# Supplementary material
Source: PubMed Central journal article supplement (PMC8088285)
Supplement: NIHMS1696609-supplement-SI.pdf [file NIHMS1696609-supplement-SI.pdf]

## Supporting Information

### **AggFluor: Fluorogenic Toolbox Enables Direct Visualization of the Multi- Step Protein Aggregation Process in Live Cells**

Charles H. Wolstenholme<sup>1</sup>, Hang Hu<sup>4,5</sup>, Songtao Ye<sup>1</sup>, Brian E. Funk<sup>1</sup>, Divya Jain<sup>1</sup>, Chia-Heng Hsiung<sup>2</sup>, Gang Ning<sup>3</sup>, Yu Liu<sup>\*1,6</sup>, Xiaosong Li<sup>\*4</sup>, Xin Zhang<sup>\*1,2,3</sup>

<sup>1</sup>Department of Chemistry, <sup>2</sup>Department of Biochemistry and Molecular Biology, <sup>3</sup>The Huck Institute of Life Sciences, The Pennsylvania State University, University Park, Pennsylvania 16802, United States, <sup>4</sup>Department of Chemistry, <sup>5</sup>Molecular Engineering and Sciences Institute, University of Washington, Seattle, Washington 98105, United States, <sup>6</sup>Dalian Institute of Chemical Physics, 457 Zhongshan Road, Dalian 116023, China

Corresponding Authors: Xin Zhang ([xuz31@psu.edu](mailto:xuz31@psu.edu)), Xiaosong Li ([xsli@uw.edu](mailto:xsli@uw.edu)), Yu Liu ([liuyu@dicp.ac.cn](mailto:liuyu@dicp.ac.cn)).

## Contents

### 1. Experimental Methods

- 1.1. Viscosity Sensitivity Measurements
- 1.2. Absorbance, Spectra, Fluorescence Spectra
- 1.3. Quantum Yield and Brightness
- 1.4. Purification of Recombinant POI-Halo Proteins
- 1.5. In Vitro Aggregation Assays of SOD1-Halo and FLuc-Halo
- 1.6. Negative Staining Electron Microscopy
- 1.7. Confocal Fluorescence Microscopy
- 1.8. Small molecule Induced Aggregation, Disaggregation and Degradation
- 1.9. PES of the Rotational Motion Along the  $\varphi$  Dihedral Angle Using CASSCF Rigid Scan
- 1.10. In Vitro Tubridy Assays of SOD1-Halo and Fluc-Halo

### 2. Supplementary Tables

### 3. Supplementary Figures

- 3.1. Spectra of P1(P1h), P18(P18h), and P2-P17
- 3.2. Viscosity Sensitivity
- 3.3. Molecular Orbital Analyses
- 3.4. Potential Energy Surfaces
- 3.5. In vitro Protein Aggregation Assays
- 3.6. Confocal Fluorescence Microscopy

### 4. Synthetic Methods

- 4.1. General methods
- 4.2. Supplementary Schemes

### 5. NMR Characterizations

### 6. Supplementary Notes

### 7. References

## 1. Experimental methods

### 1.1 Viscosity Sensitivity Measurements.

From 2 mM probe stock solutions in DMSO, all probes were prepared as 5  $\mu$ M, 25 °C in a series of ethylene glycol/glycerol (EG/G) solutions in the following mixing ratios: EG/G = 70/30 (81 cP), 50/50 (183 cP), 40/60 (283 cP), 30/70 (426 cP), 20/80 (621 cP), 0/100 (1069 cp). All samples were placed on a Vortex-Genie 2 for at least 15 minutes to thoroughly mix before transferring to a 96-well clear flat bottom polystyrene plate (Costar) for spectral measurements. Fluorescent measurements were initially carried out on each dye dissolved in 100% glycerol to determine wavelength of maximal excitation and emission peaks. Subsequently, emission intensity at the peak wavelength was used to record fluorescence intensity for each probe in EG/G mixtures as defined above. Six independent measurements were conducted to produce an average value for each data. Logarithm plot of emission intensity as a function of viscosity was used to determine the value of viscosity sensitivity ( $x$ ) based on the Förster-Hoffmann equation  $\log I = x \log \eta + A$ , wherein  $\eta$  is viscosity (cP),  $I$  is the fluorescence intensity,  $x$  is the viscosity sensitivity.

### 1.2 Absorbance, Spectra, Fluorescence Spectra.

Absorbance, excitation and emission spectra were recorded using a Tecan M1000Pro fluorescence plate reader from 10  $\mu$ M probe solutions in glycerol, 25°C. After thorough mixing, 100  $\mu$ L sample aliquots were transferred to a 96-well clear flat bottom polystyrene plate (Costar).

### 1.3 Quantum Yield and Brightness.

Quantum yield measurements were carried out following established protocol<sup>1</sup>. P1 ( $\Phi_{\text{std}} = 0.22$ , 100% glycerol, 25 °C) was used as the reference standard. Probes were diluted independently from a 2 mM stock solution in DMSO to produce samples (1–5  $\mu$ M in 1  $\mu$ M increments) in 100% glycerol, 25 °C for analysis. Emission spectra were recorded with excitation at wavelengths that overlap with the P1 absorption standard. The integrals of the resulting emission spectra were plotted as a function of the absorbances at the excitation wavelength for each sample. Quantum yields were calculated from the obtained data according to **Equation 1**, where gradient corresponds to the linear slope of the relationship between absorbance and emission integral and  $\eta$  is the refractive index of the solvent. Standard error of this gradient is reported as percent of the

slope for all quantum yields, example gradient for compound 1 shown below. Absorbance maxima for each sample were plotted as a function of concentration to obtain the respective molar extinction coefficient ( $\epsilon$ ) via the slope of the resulting linear curve. Brightness was calculated to be  $\Phi \times \epsilon$ .

**Equation 1:** 
$$\Phi_x = \frac{\text{Gradient}_x}{\text{Gradient}_{\text{std}}} \cdot \frac{\eta_x^2}{\eta_{\text{std}}^2} \cdot \Phi_{\text{std}}$$

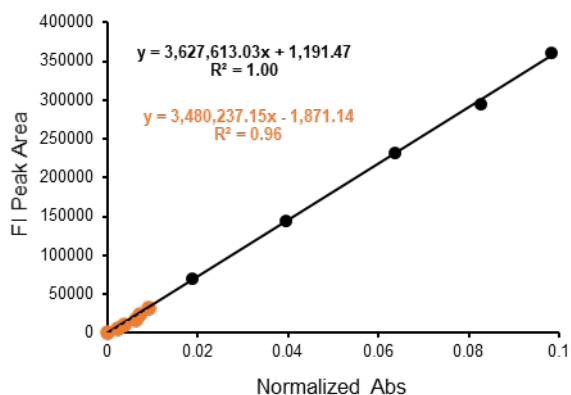

#### 1.4 Purification of Recombinant POI-Halo Proteins.

SOD1(A4V)-Halo-His6 plasmid was constructed from the SOD1(WT)-Halo-His6 using the QuickChange PCR to introduce point mutations of A4V, G85R or G93A. Fluc(R188Q) was acquired as a gift from Ulric Hartl (Addgene Plasmid # 90171). This gene was sub-cloned into a pET29b vector containing Halo-6His to generate the Fluc(R188Q)-Halo-His6 plasmid.

Plasmids were transformed into *E. coli* BL21DE3\* competent cells harboring a pBAD vector encoding  $\sigma_{32}$ -I54N<sup>2</sup>. A single colony was picked and inoculated into 5 mL LB containing ampicillin and kanamycin, followed by serial dilution. The cultures were grown overnight at 37°C with shaking at 200 rpm. Once OD<sub>600</sub> reached ~0.8, 15 mL of starter culture was introduced into a 1.5 L LB media supplemented with ampicillin and kanamycin. When OD<sub>600</sub> reached ~0.4, L-arabinose was added to a final concentration of 0.2 mg/ml to induce the expression of  $\sigma_{32}$ -I54N that could globally upregulate cellular chaperones to assist folding of recombinant proteins. Subsequently, the cultured was subjected to 30 °C for further growth. When OD<sub>600</sub> reached ~0.8, isopropyl -D-1-thiogalactopyranoside was added to a final concentration of 0.5 mM to induce the expression of recombinant protein. Expression was carried out overnight at 18 °C. Cells were harvested and stored in a -80°C freezer until use.

To carry out protein purification, cells were thawed and lysed by sonication on ice in Buffer A (50 mM Tris-HCl, pH 7.5, 100 mM NaCl) with addition of 1mM phenylmethyl sulfonyl fluoride (PMSF). The lysate was cleared by centrifugation at 16,000 G for 60 min at 4°C. Supernatant was collected and loaded onto a 6 mL pre-charged IMAC Ni<sup>2+</sup> column (Profinity™ IMAC Resin, Bio-Rad), followed by a washing step with Buffer A. SOD1 or FLUC was then eluted with gradient addition of Buffer B (50 mM Tris-HCl, pH 7.5, 100 mM NaCl, 500 mM imidazole). Fractions were identified by SDS-PAGE analyses, pooled and loaded onto a gel filtration column (HiPrep™ 16/60 Sephacryl™ S200HR, GE Healthcare) to allow further purification and buffer exchange (50 mM Tris-HCl, pH 7.5, 100 mM NaCl). The resulted protein fractions were analyzed by SDS-PAGE to have >95% purity before concentrated and flash frozen.

### ***1.5 In Vitro Aggregation Assays of SOD1-Halo and Fluc-Halo.***

**SOD1(mutants)-Halo:** Aggregation was carried out with DPBS buffer with 80 mM EDTA added after conjugation to chelate the structural metal. Conjugation of P1h or P18h to purified SOD1-Halo protein was completed by incubation of the probe (5 μM) with protein (25 μM) in a 1.5 mL microcentrifuge tube for 15 min in the absence of ambient light prior. Reaction was carried out quiescently at indicated temperatures. Fluorescence of P1h was measured at  $E_x = 530 \text{ nm}/E_m = 620 \text{ nm}$  and P18h  $E_x = 450 \text{ nm}/E_m = 510 \text{ nm}$  using a Tecan M1000Pro fluorescence plate reader.

**Fluc-R118Q-Halo:** Aggregation was carried out with DPBS buffer. Conjugation of P1h or P18h to purified Fluc-Halo protein was completed by incubation of the probe (5 μM) with protein (25 μM) in a 1.5 mL microcentrifuge tube for 15 min at 4°C in the absence of ambient light prior. Reaction was carried out quiescently at indicated temperatures. Fluorescence of P1h was measured at  $E_x = 530 \text{ nm}/E_m = 620 \text{ nm}$  and P18h  $E_x = 450 \text{ nm}/E_m = 510 \text{ nm}$  using a Tecan M1000Pro fluorescence plate reader.

### ***1.6 Negative Staining Electron Microscopy.***

Before applying for sample, Formvar films with carbon-coated 400 mesh EM grids were plasma-discharged. A small amount of sample (~5 μL) was loaded into the grid. The grids were cleaned to remove excess of the sample, stained with 1% aqueous uranyl and then imaged.

### ***1.7 Confocal Fluorescence Microscopy.***

HEK293T cells were seeded at approximately 25% confluency in poly-D-lysine coated 35 mm glass bottom dishes. For 24 hrs, cells were grown in DMEM media supplemented with 10% FBS and Penicillin-Streptomycin antibiotics until they reached 40-50% confluency. Transfection was carried out using X-tremeGene™ 9 DNA transfection reagent according to the manufacturer's instructions. To label SOD1-Halo and Htt-Halo proteins, protein expression was carried out in the presence of 0.5  $\mu$ M P1h, 0.5  $\mu$ M P18h and/or 0.5  $\mu$ M Coumarin Halo-Tag ligand to form covalent conjugate with the Halo-Tag. To remove unbound Halo ligands, the cells were washed by replacing media with fresh DMEM supplemented with 0.1  $\mu$ g/mL Hoechst 33342 (no Hoechst 33342 was added if the Coumarin Halo-Tag ligand was used) and incubating for 30 min at 37 °C. Confocal images were obtained using Olympus FluoView™ FV1000 or Zeiss LSM 880 confocal microscope. P1h was visualized using the green laser (543/563 nm). P18h was visualized using the blue (453/458 nm) laser. Nuclear staining and coumarin Halo-Tag ligand were visualized using the violet laser (405 nm). For all imaging experiments, laser intensities, gain and other settings were kept identical to exclude artifacts and ensure robustness of data.

### ***1.8 Small molecule Induced Aggregation, Disaggregation and Degradation.***

**MG132:** POI-Halo was transiently transfected and expressed in HEK293T cells for 24 h (SOD1(mutant)-Halo) or 48 h (Htt-Q46-Halo), in the presence fluorescent ligands as indicated. Subsequently, excess probes were washed away by incubating cells with fresh DMEM media for 30 min at 37 °C. Then, cells were replaced into fresh DMEM media containing 5  $\mu$ M MG132 to induce proteome aggregation. Cells were treated for 8 or 24 h prior to fluorescence confocal microscopy.

**Hsp70 activator YM-1:** Htt-Q110-Halo was transiently transfected in HEK293T cells in the presence of indicated fluorescent ligands. After 30 min, YM-1 was added to a final concentration of 1  $\mu$ M. Proteins were expressed for 48 h, and subsequently excess probes were washed away by incubating cells with fresh DMEM media for 30 min at 37 °C.

**Proteasome activator PD169316:** Htt-Q46-Halo or Htt-Q110-Halo were transiently transfected in HEK293T cells in the presence of indicated fluorescent ligands. After 30 min, PD169316 was added to a final concentration of 1  $\mu$ M. Proteins were expressed for 48 h, and subsequently excess probes were washed away by incubating cells with fresh DMEM media for 30 min at 37 °C.

**Co-treatment using YM-1 and PD169316:** Htt-Q110-Halo were transiently transfected in HEK293T cells in the presence of indicated fluorescent ligands. After 30 min, YM-1 and PD169316 were added to a final concentration of 1  $\mu$ M for each compound. Proteins were expressed for 48 h, and subsequently excess probes were washed away by incubating cells with fresh DMEM media for 30 min at 37 °C.

### ***1.9 PES of the Rotational Motion Along the $\phi$ Dihedral Angle Using CASSCF Rigid Scan***

Computational analyses were carried out to study potential energy surface (PES) of the rotational motion along the  $\phi$  dihedral angle for AggFluor P1 and P18 at both the ground ( $S_0$ ) and excited ( $S_1$ ) state. To obtain accurate descriptions of electronic states across the PES of the bond rotation, the multi-reference nature of the broken bond near the twisted geometry must be addressed<sup>3</sup>. Thus, in this work, state-averaged complete active space self-consistent field (CASSCF) method was used to construct the PES of the rotational motion along the  $\phi$  dihedral angle<sup>4-8</sup>. Bases set was chosen to be 6-31G(d,p)<sup>9</sup>. All the calculations are performed in Gaussian computational package version 16 A.03.

The initial ground state geometries of both P1 and P18 were optimized in gas phase at the level of B3LYP with 6-31G(d,p)<sup>10</sup>. The optimized geometries are verified as true minima via frequency calculations. To perform rigid scans, the  $\phi$  dihedral angle was rotated from planar (0°) to perpendicular (90°) geometry with an interval of 15°, while all other degrees of freedom were frozen. Then, single-point CASSCF calculations were conducted at each geometry to plot the PES. Particularly, CASSCF calculation are state-averaged over the ground state ( $S_0$ ) and first excited state ( $S_1$ ) with equal weights. The choices of CAS for P1 and P18 are CAS(10,10) and CAS(6,6), respectively. After state-averaged CASSCF optimizations, the molecular orbitals in active space share similar characters between P1 and P18. Population analysis including Mulliken Charges was performed using state-averaged CASSCF wave functions.

### ***1.10 In Vitro Turbidity Assays of SOD1-Halo and Fluc-Halo***

**SOD1(mutants)-Halo:** Aggregation of protein (25  $\mu\text{M}$ ) was carried out with DPBS buffer with 80 mM EDTA added to chelate the structural metal. 250 $\mu\text{L}$  of protein was added to a quartz cuvette and reaction was carried out quiescently at 59°C. Light scattering was monitored over 1h via absorbance at 395nm using a temperature-controlled Agilent Technologies Carry 300 Series UV-Vis Spectrophotometer.

**Fluc-R118Q-Halo:** Aggregation of protein (25  $\mu\text{M}$ ) was carried out with DPBS buffer. 250 $\mu\text{L}$  of protein was added to a quartz cuvette and reaction was carried out quiescently at 57°C. Light scattering was monitored over 1h via absorbance at 395nm using a temperature-controlled Agilent Technologies Carry 300 Series UV-Vis Spectrophotometer.



## 2. Supplementary Tables

**Table S1:** Photophysical properties of AggFluor P1-P18, P1h, P18h.

| Compound   | $\lambda_{\max}$ (nm) | Em. (nm) | $\Phi$<br>(927 cP) | $\Phi^*$<br>( $3 \cdot 10^{11}$ cP) | $\epsilon$ | B     | $\chi$ | Stoke's<br>Shift (nm) |
|------------|-----------------------|----------|--------------------|-------------------------------------|------------|-------|--------|-----------------------|
| P1 (P1h)   | 540                   | 632      | 0.22               | 0.33                                | 36,195     | 7,963 | 0.28   | 92                    |
| P2         | 524                   | 604      | 0.21               | 0.52                                | 1,878      | 357   | 0.32   | 80                    |
| P3         | 526                   | 612      | 0.26               | 0.69                                | 14,109     | 3,668 | 0.36   | 86                    |
| P4         | 520                   | 609      | 0.20               | 0.57                                | 8,671      | 1,734 | 0.38   | 89                    |
| P5         | 519                   | 608      | 0.19               | 0.67                                | 12,071     | 2,293 | 0.41   | 89                    |
| P6         | 522                   | 649      | 0.23               | 0.90                                | 5,353      | 1,231 | 0.43   | 127                   |
| P7         | 536                   | 655      | 0.24               | 1.00                                | 8,616      | 2,068 | 0.51   | 119                   |
| P8         | 545                   | 596      | 0.20               | 0.33                                | 3,818      | 764   | 0.26   | 51                    |
| P9         | 525                   | 616      | 0.22               | 0.43                                | 12,920     | 2,842 | 0.31   | 91                    |
| P10        | 515                   | 602      | 0.20               | 0.36                                | 9,762      | 1,952 | 0.39   | 87                    |
| P11        | 520                   | 619      | 0.18               | 0.80                                | 11,382     | 2,049 | 0.49   | 99                    |
| P12        | 524                   | 600      | 0.19               | 0.84                                | 17,218     | 3,271 | 0.50   | 76                    |
| P13        | 512                   | 598      | 0.16               | 0.23                                | 3,778      | 604   | 0.30   | 86                    |
| P14        | 481                   | 577      | 0.11               | 0.52                                | 3,127      | 344   | 0.43   | 96                    |
| P15        | 473                   | 574      | 0.05               | 0.27                                | 755        | 38    | 0.47   | 101                   |
| P16        | 514                   | 599      | 0.15               | 0.98                                | 6,275      | 941   | 0.48   | 85                    |
| P17        | 511                   | 592      | 0.15               | 0.97                                | 10,895     | 1,634 | 0.53   | 81                    |
| P18 (P18h) | 450                   | 518      | 0.03               | 0.36                                | 23,717     | 949   | 0.68   | 68                    |

\*Quantum yield at  $3 \cdot 10^{11}$  cP was extrapolated using fold change of fluorescent intensity

**Table S2:** The optimized geometry of P1 at the ground state ( $S_0$ ). The total energy at this geometry is  $-1186.40684958$  Hartree. The geometry was optimized using Gaussian computational package version 16 A.03.

| Atom Label | Atom | X(Å)        | Y(Å)        | Z(Å)        |
|------------|------|-------------|-------------|-------------|
| 1          | C    | -0.03778000 | 0.93963000  | -1.03151200 |
| 2          | C    | 2.09609600  | 1.33176400  | -1.00771800 |
| 3          | C    | 1.44830100  | 2.60027500  | -1.43765800 |
| 4          | N    | 0.08674800  | 2.27556600  | -1.42997200 |
| 5          | N    | 1.11884100  | 0.36728500  | -0.77943400 |
| 6          | O    | 1.91806800  | 3.69337400  | -1.73909500 |
| 7          | C    | 3.45173700  | 1.22244900  | -0.88278100 |
| 8          | H    | 3.99160900  | 2.13638600  | -1.12532100 |
| 9          | C    | -1.33533100 | 0.30770600  | -0.92634200 |
| 10         | H    | -2.19708800 | 0.92181900  | -1.16873700 |
| 11         | C    | -1.49118800 | -0.98549000 | -0.54682100 |
| 12         | H    | -0.58016000 | -1.53744400 | -0.32267100 |
| 13         | C    | 4.26167200  | 0.09567400  | -0.48458100 |
| 14         | C    | 5.66555800  | 0.24476600  | -0.43319100 |
| 15         | C    | 3.74281100  | -1.17149500 | -0.12851800 |
| 16         | C    | 6.50814100  | -0.79107600 | -0.05852100 |
| 17         | H    | 6.10262500  | 1.20614000  | -0.69213400 |
| 18         | C    | 4.57373900  | -2.21537100 | 0.24732600  |
| 19         | H    | 2.66936800  | -1.31833100 | -0.14970500 |
| 20         | C    | 5.98490700  | -2.06325400 | 0.28520000  |
| 21         | H    | 7.57532600  | -0.60941800 | -0.03346700 |
| 22         | H    | 4.12045000  | -3.16179500 | 0.51547700  |
| 23         | N    | 6.81441300  | -3.11393700 | 0.63484000  |
| 24         | C    | 6.24149900  | -4.34860000 | 1.14942000  |
| 25         | H    | 5.69015100  | -4.19752900 | 2.09034400  |
| 26         | H    | 5.55741500  | -4.79941200 | 0.42164800  |
| 27         | H    | 7.04407400  | -5.06383000 | 1.33422300  |
| 28         | C    | 8.23702200  | -2.87755600 | 0.82775500  |
| 29         | H    | 8.69828100  | -2.48284700 | -0.08465500 |
| 30         | H    | 8.43952700  | -2.17089000 | 1.64745000  |
| 31         | H    | 8.72734300  | -3.82324400 | 1.06231400  |

|    |   |             |             |             |
|----|---|-------------|-------------|-------------|
| 32 | C | -2.73186500 | -1.72827300 | -0.40351500 |
| 33 | C | -2.68627800 | -3.07897400 | -0.00338600 |
| 34 | C | -4.01352600 | -1.18452100 | -0.63464600 |
| 35 | C | -3.83190500 | -3.84786800 | 0.15410400  |
| 36 | H | -1.71972100 | -3.53635700 | 0.19326200  |
| 37 | C | -5.16868900 | -1.93516200 | -0.48337100 |
| 38 | H | -4.11481800 | -0.14616900 | -0.93612600 |
| 39 | C | -5.11449300 | -3.29969500 | -0.09257100 |
| 40 | H | -3.72555700 | -4.87800500 | 0.47008500  |
| 41 | H | -6.12260600 | -1.45782800 | -0.66994700 |
| 42 | N | -6.26344900 | -4.05858400 | 0.03367400  |
| 43 | C | -7.56805700 | -3.42004800 | -0.05757000 |
| 44 | H | -7.70184900 | -2.93092100 | -1.02921300 |
| 45 | H | -8.34413700 | -4.18038900 | 0.03738500  |
| 46 | H | -7.72478600 | -2.66757800 | 0.73048700  |
| 47 | C | -6.18349500 | -5.40099300 | 0.58940200  |
| 48 | H | -5.52298300 | -6.03729500 | -0.01068300 |
| 49 | H | -5.81516800 | -5.40583600 | 1.62686600  |
| 50 | H | -7.17635200 | -5.85212000 | 0.57689600  |
| 51 | C | -0.95791200 | 3.21474400  | -1.78682300 |
| 52 | H | -1.52795400 | 2.86723800  | -2.65509200 |
| 53 | H | -1.64311400 | 3.38697200  | -0.94989200 |
| 54 | H | -0.46361700 | 4.15509300  | -2.04002700 |

---

**Table S3:** The optimized geometry of P1 at the excited state ( $S_1$ ). The total energy at this geometry is  $-1186.32262097$  Hartree. The geometry was optimized using Gaussian computational package version 16 A.03.

| Atom Label | Atom | X(Å)        | Y(Å)        | Z(Å)        |
|------------|------|-------------|-------------|-------------|
| 1          | C    | -0.07818300 | 1.02860100  | -1.06644500 |
| 2          | C    | 2.07895700  | 1.38135400  | -1.01026800 |
| 3          | C    | 1.43933000  | 2.66076700  | -1.45462400 |
| 4          | N    | 0.07957600  | 2.35415000  | -1.46417400 |
| 5          | N    | 1.12281800  | 0.44343700  | -0.79392600 |
| 6          | O    | 1.93615100  | 3.74234700  | -1.75058300 |
| 7          | C    | 3.45902300  | 1.28542200  | -0.87404600 |
| 8          | H    | 4.00429600  | 2.19490300  | -1.11326200 |
| 9          | C    | -1.33031600 | 0.39744000  | -0.96621900 |
| 10         | H    | -2.21220900 | 0.97805500  | -1.21290100 |
| 11         | C    | -1.43800200 | -0.93443200 | -0.56198100 |
| 12         | H    | -0.50337400 | -1.44233200 | -0.33674700 |
| 13         | C    | 4.22286900  | 0.14903200  | -0.46257400 |
| 14         | C    | 5.64036700  | 0.24705100  | -0.38192700 |
| 15         | C    | 3.65186900  | -1.11082100 | -0.11694000 |
| 16         | C    | 6.43328900  | -0.81368400 | 0.00931300  |
| 17         | H    | 6.11406000  | 1.19136500  | -0.63766400 |
| 18         | C    | 4.43900000  | -2.17837000 | 0.27586200  |
| 19         | H    | 2.57492400  | -1.21859000 | -0.16809300 |
| 20         | C    | 5.85441600  | -2.06890900 | 0.35336000  |
| 21         | H    | 7.50673800  | -0.67535900 | 0.05051000  |
| 22         | H    | 3.95114400  | -3.11248200 | 0.52709200  |
| 23         | N    | 6.63720100  | -3.13277400 | 0.74545200  |
| 24         | C    | 6.02469300  | -4.40719300 | 1.09074400  |
| 25         | H    | 5.33237700  | -4.30581800 | 1.93718000  |
| 26         | H    | 5.46892800  | -4.83067800 | 0.24343900  |
| 27         | H    | 6.80429600  | -5.11474300 | 1.37291400  |
| 28         | C    | 8.08459300  | -2.99618300 | 0.81606600  |
| 29         | H    | 8.51549200  | -2.74619500 | -0.16270800 |
| 30         | H    | 8.38258500  | -2.21725000 | 1.53055200  |
| 31         | H    | 8.51786200  | -3.94060300 | 1.14519000  |

|    |   |             |             |             |
|----|---|-------------|-------------|-------------|
| 32 | C | -2.63397800 | -1.69567800 | -0.41424700 |
| 33 | C | -2.56641500 | -3.05249700 | 0.00850600  |
| 34 | C | -3.94273700 | -1.18826200 | -0.65826500 |
| 35 | C | -3.69121200 | -3.84013800 | 0.16993200  |
| 36 | H | -1.59019400 | -3.48389100 | 0.21707600  |
| 37 | C | -5.07546300 | -1.96836900 | -0.49949200 |
| 38 | H | -4.07004800 | -0.15710800 | -0.97276000 |
| 39 | C | -4.99105900 | -3.32591500 | -0.09081100 |
| 40 | H | -3.56294000 | -4.86335400 | 0.50123400  |
| 41 | H | -6.04088100 | -1.51761400 | -0.69537500 |
| 42 | N | -6.12309600 | -4.11914600 | 0.03308200  |
| 43 | C | -7.44044200 | -3.50634900 | -0.03626900 |
| 44 | H | -7.58525300 | -2.99519400 | -0.99422300 |
| 45 | H | -8.20046500 | -4.28542800 | 0.03884100  |
| 46 | H | -7.61112300 | -2.77605700 | 0.77132000  |
| 47 | C | -6.01663900 | -5.42958700 | 0.65532200  |
| 48 | H | -5.31117000 | -6.06641500 | 0.11068700  |
| 49 | H | -5.68830800 | -5.37465700 | 1.70600700  |
| 50 | H | -6.99144800 | -5.91856800 | 0.62535800  |
| 51 | C | -0.95513300 | 3.29887400  | -1.83427000 |
| 52 | H | -1.51749200 | 2.94180600  | -2.70331700 |
| 53 | H | -1.64710600 | 3.46605400  | -1.00225700 |
| 54 | H | -0.46032400 | 4.23873000  | -2.08621000 |

---

**Table S4:** Potential energy surface (PES) of P1 at both  $S_0$  and  $S_1$  states as a function of the  $\varphi$  angle using SA-CASSCF. Plot of the PES is shown in **Figure 2e**.

| Dihedral Angle $\varphi$ | Energy Raw (A.U.) |              | Energy relative to $S_0$ (eV) |             |
|--------------------------|-------------------|--------------|-------------------------------|-------------|
|                          | $S_0$             | $S_1$        | $S_0$                         | $S_1$       |
| 0                        | -1178.85699       | -1178.706589 | 0                             | 4.092561611 |
| 15                       | -1178.853035      | -1178.703802 | 0.107619505                   | 4.168398668 |
| 30                       | -1178.841752      | -1178.695365 | 0.414641218                   | 4.397977875 |
| 45                       | -1178.841513      | -1178.693456 | 0.421144647                   | 4.449923674 |
| 60                       | -1178.831856      | -1178.6942   | 0.683921274                   | 4.42967869  |
| 70                       | -1178.809217      | -1178.700269 | 1.299951103                   | 4.264535131 |
| 80                       | -1178.793322      | -1178.707498 | 1.732469948                   | 4.067826812 |
| 90                       | -1178.779813      | -1178.715317 | 2.100063347                   | 3.855064003 |

**Table S5:** Mulliken Charges Analysis of P1 at both  $S_0$  and  $S_1$  states as a function of the  $\varphi$  angle.

| Dihedral<br>Angle<br>$\varphi$ | CSF  1><br>Coefficients |         | CSF  2><br>Coefficients |          | Q_EDG    |         | Q_EWG    |          | Q_EDG –<br>Q_EWG |         |
|--------------------------------|-------------------------|---------|-------------------------|----------|----------|---------|----------|----------|------------------|---------|
|                                | $S_0$                   | $S_1$   | $S_0$                   | $S_1$    | $S_0$    | $S_1$   | $S_0$    | $S_1$    | $S_0$            | $S_1$   |
|                                | 0                       | 0.89421 | -0.26304                | 0.25742  | 0.88530  | 0.18834 | 0.18446  | -0.18834 | -0.18446         | 0.37668 |
| 15                             | 0.89417                 | 0.26197 | -0.25671                | 0.88607  | 0.19678  | 0.18167 | -0.19678 | -0.18167 | 0.39357          | 0.36334 |
| 30                             | 0.89954                 | 0.23381 | -0.23043                | 0.89581  | 0.21869  | 0.16746 | -0.21869 | -0.16745 | 0.43738          | 0.33491 |
| 45                             | 0.77457                 | 0.51613 | -0.50107                | 0.76426  | 0.15742  | 0.56475 | -0.15742 | -0.56475 | 0.31483          | 1.12950 |
| 60                             | 0.64646                 | 0.67251 | 0.66039                 | -0.63484 | 0.14433  | 0.65590 | -0.14433 | -0.65590 | 0.28866          | 1.31179 |
| 70                             | 0.52431                 | 0.77190 | -0.75990                | 0.51493  | 0.11073  | 0.73147 | -0.11073 | -0.73147 | 0.22146          | 1.46294 |
| 80                             | 0.32248                 | 0.87599 | -0.86314                | 0.31710  | 0.04363  | 0.82488 | -0.04363 | -0.82488 | 0.08727          | 1.64975 |
| 90                             | 0.00000                 | 0.93351 | -0.92009                | 0.00000  | -0.00857 | 0.88368 | 0.00857  | -0.88367 | -0.01713         | 1.76735 |

**Table S6:** The optimized geometry of P18 at the ground state ( $S_0$ ). The total energy at this geometry is  $-783.268427396$  Hartree. The geometry was optimized using Gaussian computational package version 16 A.03.

| Atom Label | Atom | X(Å)        | Y(Å)        | Z(Å)        |
|------------|------|-------------|-------------|-------------|
| 1          | C    | -1.30584500 | -1.00916000 | 1.39520800  |
| 2          | C    | 0.12134900  | -1.07072400 | -0.23240000 |
| 3          | C    | -1.16637300 | -1.54696800 | -0.79720700 |
| 4          | N    | -2.03443900 | -1.47991600 | 0.30568700  |
| 5          | N    | -0.05562700 | -0.76056700 | 1.12596400  |
| 6          | O    | -1.47814000 | -1.92090200 | -1.92315200 |
| 7          | C    | 1.25545200  | -0.97732700 | -0.98141100 |
| 8          | H    | 1.12384900  | -1.28269600 | -2.01861700 |
| 9          | C    | 2.58378600  | -0.54314100 | -0.61613200 |
| 10         | C    | 3.59621500  | -0.54195700 | -1.60084200 |
| 11         | C    | 2.95106900  | -0.10588400 | 0.67835800  |
| 12         | C    | 4.89436300  | -0.13826700 | -1.32821400 |
| 13         | H    | 3.35065300  | -0.86516500 | -2.60957600 |
| 14         | C    | 4.24446400  | 0.29995100  | 0.96483000  |
| 15         | H    | 2.19728900  | -0.08819700 | 1.45684600  |
| 16         | C    | 5.26175600  | 0.28925700  | -0.02671800 |
| 17         | H    | 5.62340700  | -0.15520800 | -2.12857100 |
| 18         | H    | 4.46862500  | 0.63012800  | 1.97164200  |
| 19         | N    | 6.55516600  | 0.67372700  | 0.26610500  |
| 20         | C    | 6.86940000  | 1.23953200  | 1.56977200  |
| 21         | H    | 6.32393300  | 2.17552000  | 1.76225500  |
| 22         | H    | 6.63326300  | 0.53461200  | 2.37543200  |
| 23         | H    | 7.93809700  | 1.45132100  | 1.61822000  |
| 24         | C    | 7.54020300  | 0.77922300  | -0.79973600 |
| 25         | H    | 7.67376100  | -0.18082100 | -1.31209200 |
| 26         | H    | 7.26399900  | 1.53358500  | -1.55184600 |
| 27         | H    | 8.50209600  | 1.06170200  | -0.37051000 |
| 28         | C    | -1.93757100 | -0.82059600 | 2.73337300  |
| 29         | H    | -2.76667800 | -0.10443000 | 2.68593100  |
| 30         | H    | -2.34171400 | -1.76375500 | 3.12028900  |
| 31         | H    | -1.18511700 | -0.44602400 | 3.42840500  |



|    |   |             |             |             |
|----|---|-------------|-------------|-------------|
| 32 | C | -3.43494000 | -1.85183300 | 0.25194500  |
| 33 | H | -4.08275800 | -1.00406200 | 0.49856100  |
| 34 | H | -3.63985800 | -2.16963700 | -0.77256900 |
| 35 | H | -3.65426300 | -2.68093600 | 0.93293300  |

---

**Table S7:** The optimized geometry of P18 at the excited state ( $S_1$ ). The total energy at this geometry is  $-783.155254054$  Hartree. The geometry was optimized using Gaussian computational package version 16 A.03.

| Atom Label | Atom | X(Å)        | Y(Å)        | Z(Å)        |
|------------|------|-------------|-------------|-------------|
| 1          | C    | -1.31185400 | -1.00684100 | 1.39420500  |
| 2          | C    | 0.11133300  | -1.07342600 | -0.25807100 |
| 3          | C    | -1.16937500 | -1.55523200 | -0.79249400 |
| 4          | N    | -2.03440100 | -1.48288700 | 0.33072400  |
| 5          | N    | -0.03643600 | -0.75690000 | 1.06863000  |
| 6          | O    | -1.50316400 | -1.94464400 | -1.91636400 |
| 7          | C    | 1.26752800  | -0.98274500 | -1.06015400 |
| 8          | H    | 1.12190800  | -1.29770600 | -2.09030200 |
| 9          | C    | 2.56898000  | -0.53777300 | -0.68608600 |
| 10         | C    | 3.61539000  | -0.52168600 | -1.65785600 |
| 11         | C    | 2.91860600  | -0.09189600 | 0.62930500  |
| 12         | C    | 4.89560500  | -0.10193800 | -1.35901600 |
| 13         | H    | 3.39213200  | -0.85270600 | -2.66879400 |
| 14         | C    | 4.20191700  | 0.32995700  | 0.93252000  |
| 15         | H    | 2.15119400  | -0.09015500 | 1.39434900  |
| 16         | C    | 5.23270100  | 0.34084600  | -0.04529800 |
| 17         | H    | 5.64410700  | -0.11409300 | -2.14196000 |
| 18         | H    | 4.40950800  | 0.65665200  | 1.94460600  |
| 19         | N    | 6.51364200  | 0.76315200  | 0.25904800  |
| 20         | C    | 6.83670000  | 1.20900200  | 1.60416200  |
| 21         | H    | 6.22756600  | 2.07483900  | 1.89889400  |
| 22         | H    | 6.67364300  | 0.41234200  | 2.34349400  |
| 23         | H    | 7.88593000  | 1.50137300  | 1.64415800  |
| 24         | C    | 7.55205300  | 0.76137200  | -0.75851300 |
| 25         | H    | 7.73237600  | -0.24893400 | -1.15131100 |
| 26         | H    | 7.29163800  | 1.41367000  | -1.60351700 |
| 27         | H    | 8.48196500  | 1.12653400  | -0.32275700 |
| 28         | C    | -1.88745300 | -0.79620700 | 2.74783600  |
| 29         | H    | -2.71739500 | -0.07525500 | 2.73597500  |
| 30         | H    | -2.28012400 | -1.72814600 | 3.17913700  |
| 31         | H    | -1.10414000 | -0.41300700 | 3.40425400  |

|    |   |             |             |             |
|----|---|-------------|-------------|-------------|
| 32 | C | -3.43197200 | -1.86357700 | 0.28826400  |
| 33 | H | -4.08015700 | -1.01572400 | 0.53443600  |
| 34 | H | -3.64208300 | -2.19269600 | -0.73164900 |
| 35 | H | -3.63899300 | -2.68518100 | 0.98230700  |

---

**Table S8:** Potential energy surface (PES) of P18 at both  $S_0$  and  $S_1$  states as a function of the  $\varphi$  angle using SA-CASSCF. Plot of the PES is shown in **Figure 4e**.

| Dihedral Angle $\varphi$ | Energy Raw (A.U.) |              | Energy relative to $S_0$ (eV) |             |
|--------------------------|-------------------|--------------|-------------------------------|-------------|
|                          | $S_0$             | $S_1$        | $S_0$                         | $S_1$       |
| 0                        | -778.3427395      | -778.1600738 | 0                             | 4.970516363 |
| 15                       | -778.3383638      | -778.1585174 | 0.119067173                   | 5.012867563 |
| 30                       | -778.3236779      | -778.1569341 | 0.518685198                   | 5.055950739 |
| 45                       | -778.3037824      | -778.1589319 | 1.060061648                   | 5.001588604 |
| 60                       | -778.2797177      | -778.167343  | 1.7148862                     | 4.772714162 |
| 70                       | -778.2626953      | -778.1761654 | 2.178082726                   | 4.532647835 |
| 80                       | -778.2478885      | -778.1855009 | 2.580990561                   | 4.278619545 |
| 90                       | -778.2411303      | -778.190128  | 2.764887941                   | 4.152711527 |

**Table S9:** Mulliken charges analysis of P18 at both  $S_0$  and  $S_1$  states as a function of the  $\varphi$  angle.

| Dihedral<br>Angle<br>$\varphi$ | CSF  1><br>Coefficients |         | CSF  2><br>Coefficients |          | Q_EDG    |         | Q_EWG    |          | Q_EDG -<br>Q_EWG |         |
|--------------------------------|-------------------------|---------|-------------------------|----------|----------|---------|----------|----------|------------------|---------|
|                                | $S_0$                   | $S_1$   | $S_0$                   | $S_1$    | $S_0$    | $S_1$   | $S_0$    | $S_1$    | $S_0$            | $S_1$   |
|                                | 0                       | 0.93920 | 0.03230                 | 0.07114  | -0.85117 | 0.15329 | 0.26822  | -0.15329 | -0.26822         | 0.30659 |
| 15                             | 0.93821                 | 0.02769 | 0.06718                 | -0.86217 | 0.15844  | 0.28811 | -0.15843 | -0.28811 | 0.31687          | 0.57622 |
| 30                             | 0.92654                 | 0.18736 | 0.15659                 | -0.90953 | 0.16803  | 0.46876 | -0.16803 | -0.46876 | 0.33606          | 0.93752 |
| 45                             | 0.80462                 | 0.52606 | 0.50967                 | -0.79030 | 0.17636  | 0.56502 | -0.17636 | -0.56502 | 0.35273          | 1.13003 |
| 60                             | 0.67799                 | 0.68591 | 0.67392                 | -0.66411 | 0.16497  | 0.63691 | -0.16497 | -0.63691 | 0.32995          | 1.27382 |
| 70                             | 0.56074                 | 0.78513 | 0.77329                 | -0.54988 | 0.13112  | 0.70670 | -0.13112 | -0.70670 | 0.26224          | 1.41340 |
| 80                             | 0.35642                 | 0.89700 | 0.88405                 | -0.35015 | 0.05730  | 0.80448 | -0.05730 | -0.80448 | 0.11460          | 1.60895 |
| 90                             | 0.00000                 | 0.96528 | 0.95150                 | 0.00547  | -0.00676 | 0.87547 | 0.00676  | -0.87547 | -0.01352         | 1.75094 |

### 3. Supplementary Figures

#### 3.1 Figures 1-20: Spectra of AggFluor P1-P18, P1h, P18h

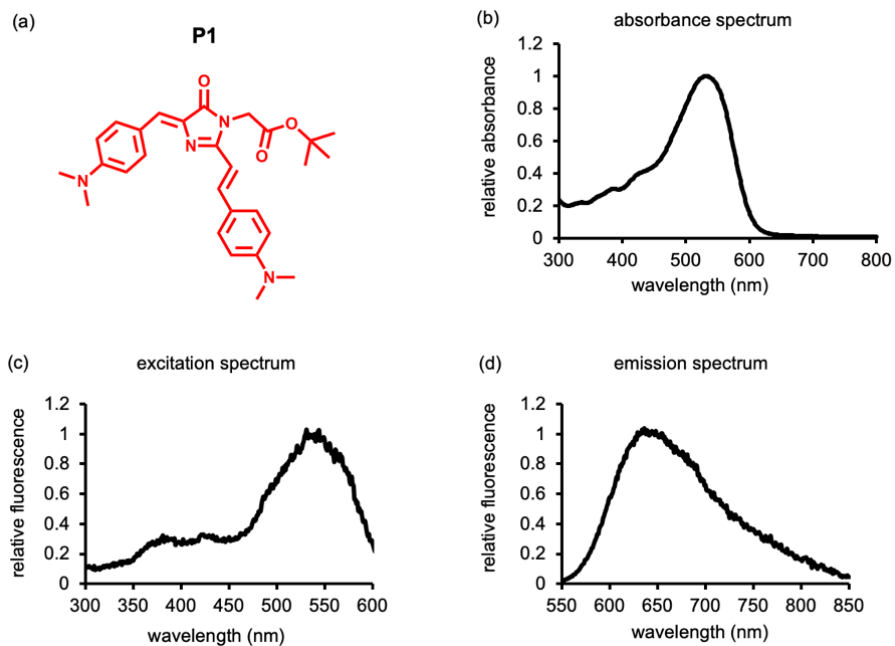

**Figure S1:** a) Structure of AggFluor P1. b) Normalized absorbance spectrum. c) Normalized excitation spectrum. d) Normalized emission spectrum. All spectra were collected using 10  $\mu\text{M}$  compound in 100% glycerol, 25°C.

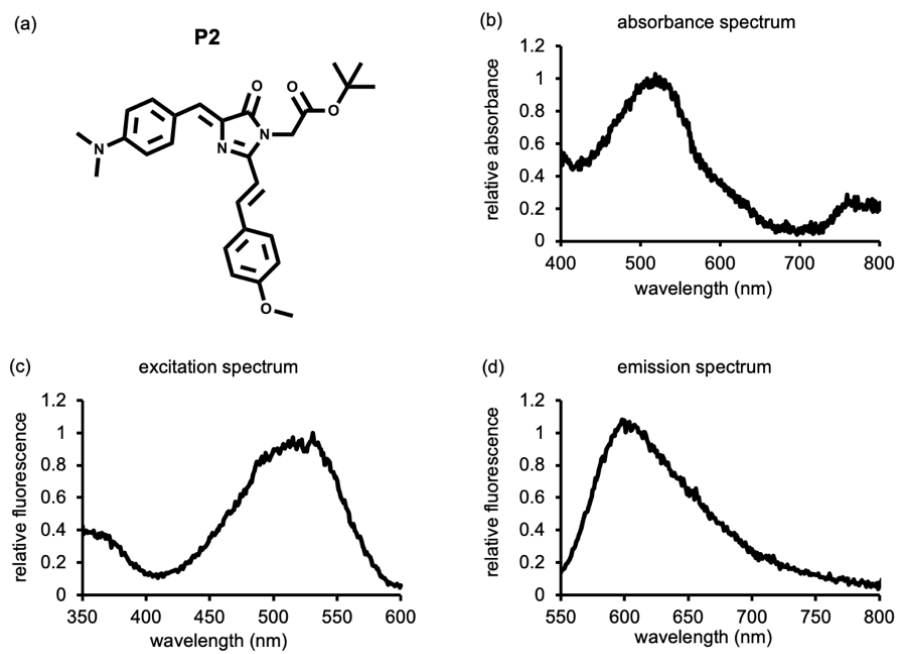

**Figure S2:** a) Structure of AggFluor P2. b) Normalized absorbance spectrum. c) Normalized excitation spectrum. d) Normalized emission spectrum. All spectra were collected using 10  $\mu$ M compound in 100% glycerol, 25°C.

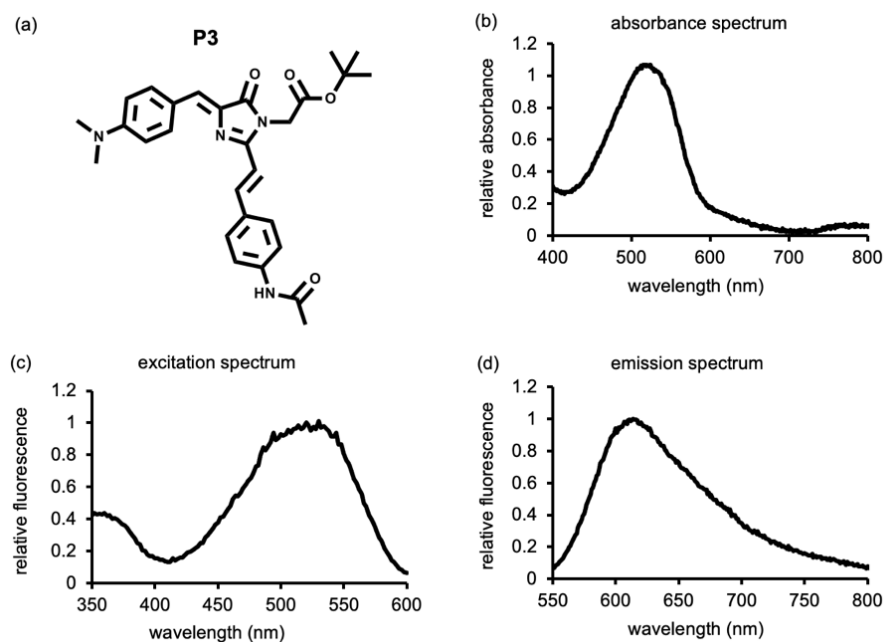

**Figure S3:** a) Structure of AggFluor P3. b) Normalized absorbance spectrum. c) Normalized excitation spectrum. d) Normalized emission spectrum. All spectra were collected using 10  $\mu$ M compound in 100% glycerol, 25°C.



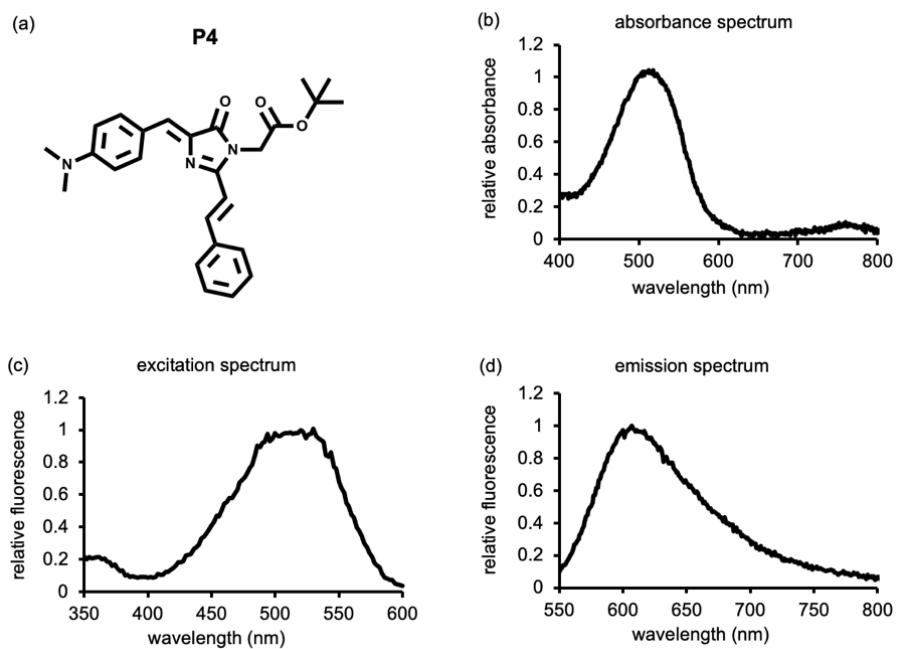

**Figure S4:** a) Structure of AggFluor P4. b) Normalized absorbance spectrum. c) Normalized excitation spectrum. d) Normalized emission spectrum. All spectra were collected using 10  $\mu\text{M}$  compound in 100% glycerol, 25°C.

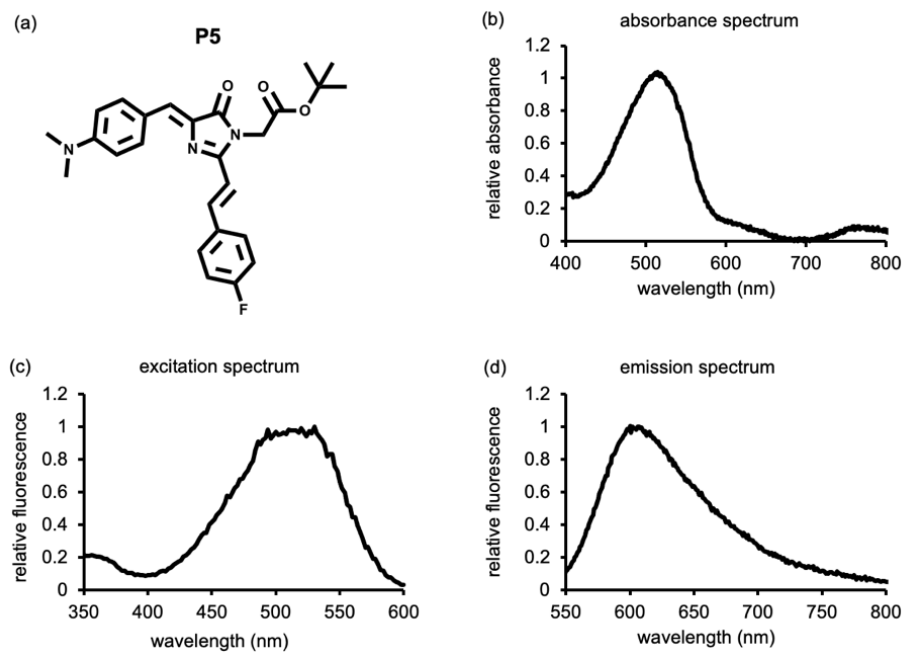

**Figure S5:** a) Structure of AggFluor P5. b) Normalized absorbance spectrum. c) Normalized excitation spectrum. d) Normalized emission spectrum. All spectra were collected using 10  $\mu\text{M}$  compound in 100% glycerol, 25°C.

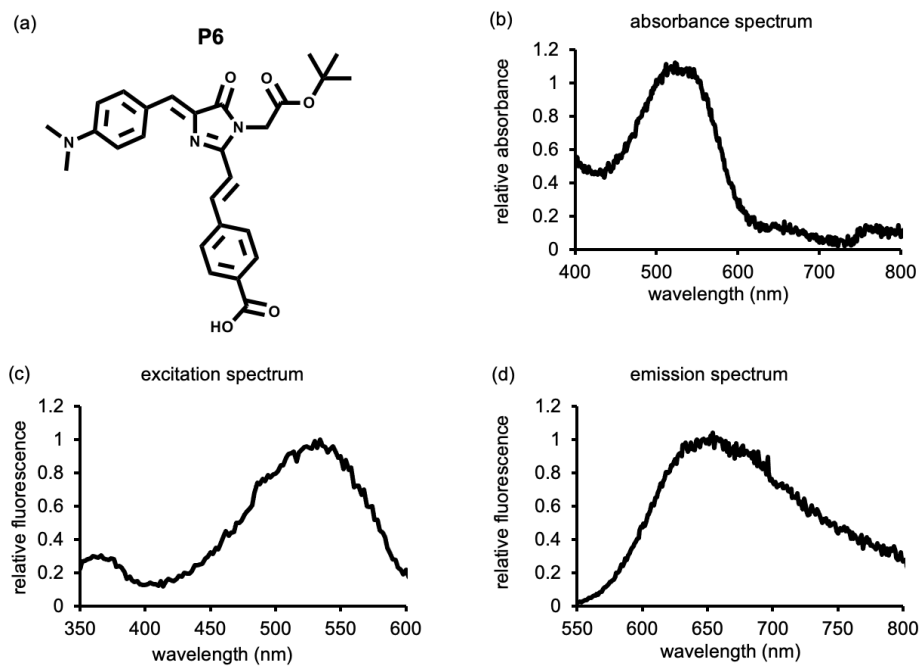

**Figure S6:** a) Structure of AggFluor P6. b) Normalized absorbance spectrum. c) Normalized excitation spectrum. d) Normalized emission spectrum. All spectra were collected using 10  $\mu$ M compound in 100% glycerol, 25°C.

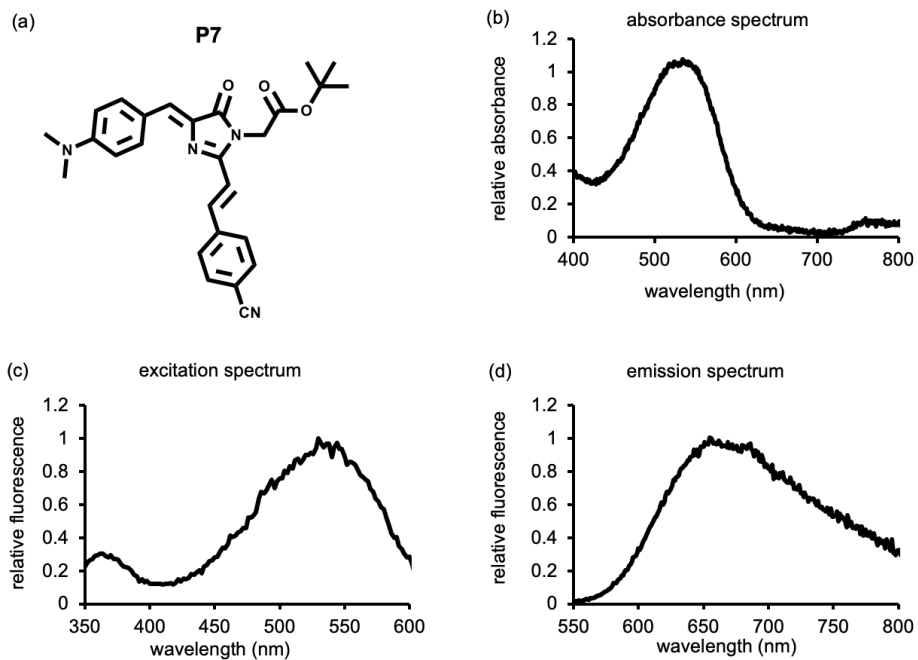

**Figure S7:** **a)** Structure of AggFluor P7. **b)** Normalized absorbance spectrum. **c)** Normalized excitation spectrum. **d)** Normalized emission spectrum. All spectra were collected using 10  $\mu\text{M}$  compound in 100% glycerol, 25°C.

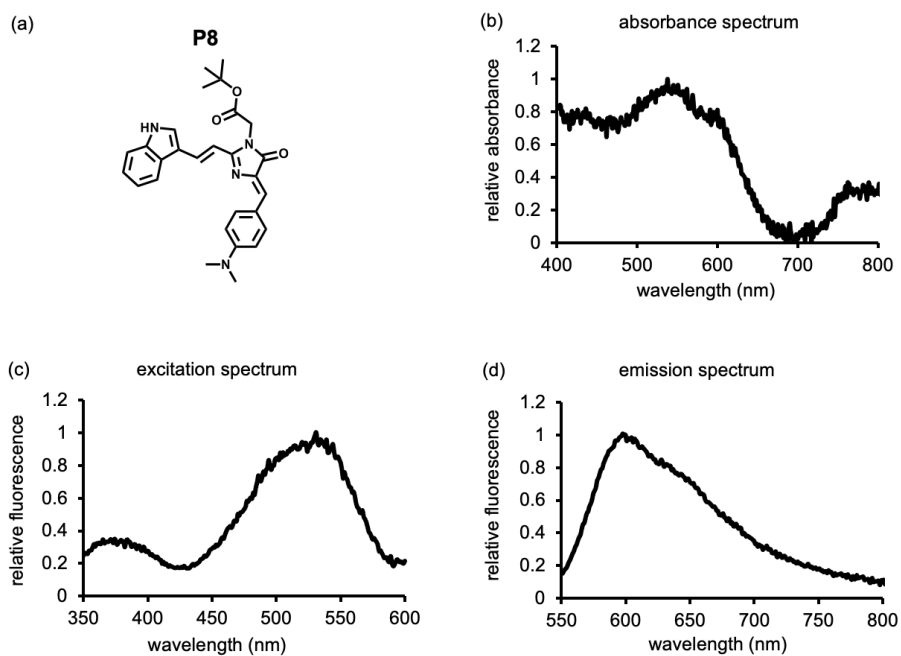

**Figure S8:** a) Structure of AggFluor P8. b) Normalized absorbance spectrum. c) Normalized excitation spectrum. d) Normalized emission spectrum. All spectra were collected using 10  $\mu\text{M}$  compound in 100% glycerol, 25°C.

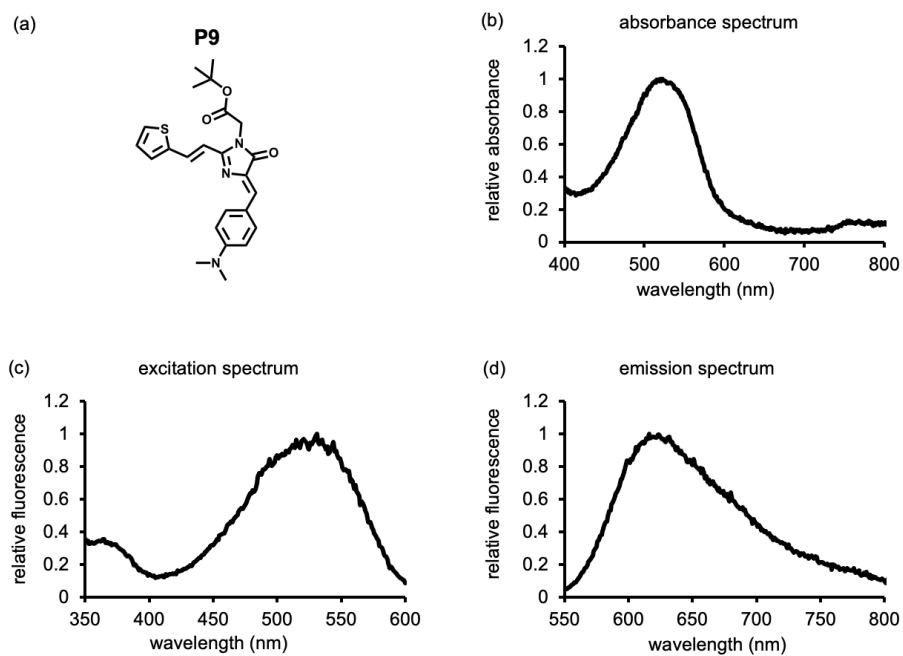

**Figure S9:** a) Structure of AggFluor P9. b) Normalized absorbance spectrum. c) Normalized excitation spectrum. d) Normalized emission spectrum. All spectra were collected using 10  $\mu$ M compound in 100% glycerol, 25°C.

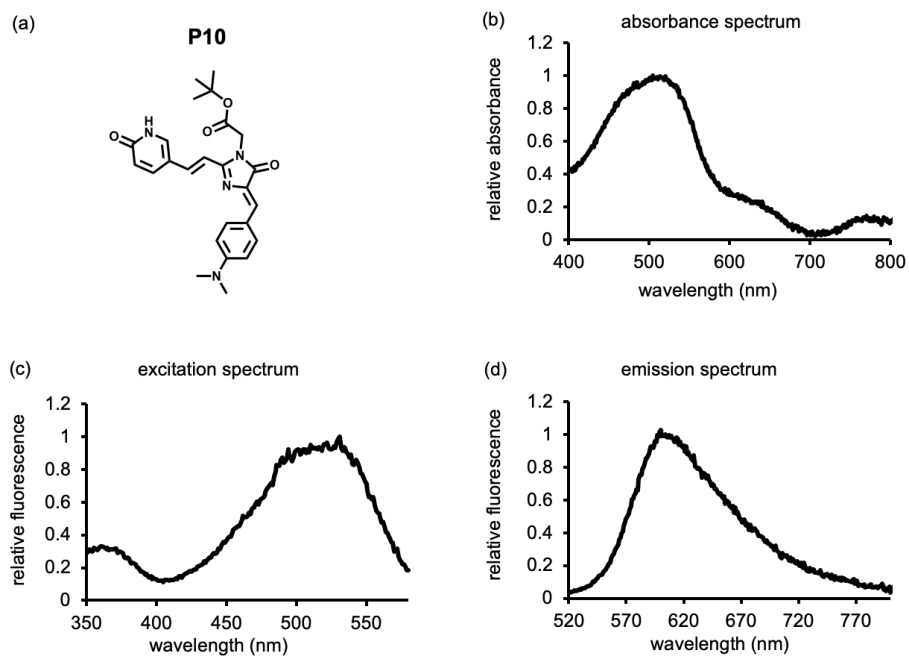

**Figure S10:** **a)** Structure of AggFluor P10. **b)** Normalized absorbance spectrum. **c)** Normalized excitation spectrum. **d)** Normalized emission spectrum. All spectra were collected using 10  $\mu\text{M}$  compound in 100% glycerol, 25°C.

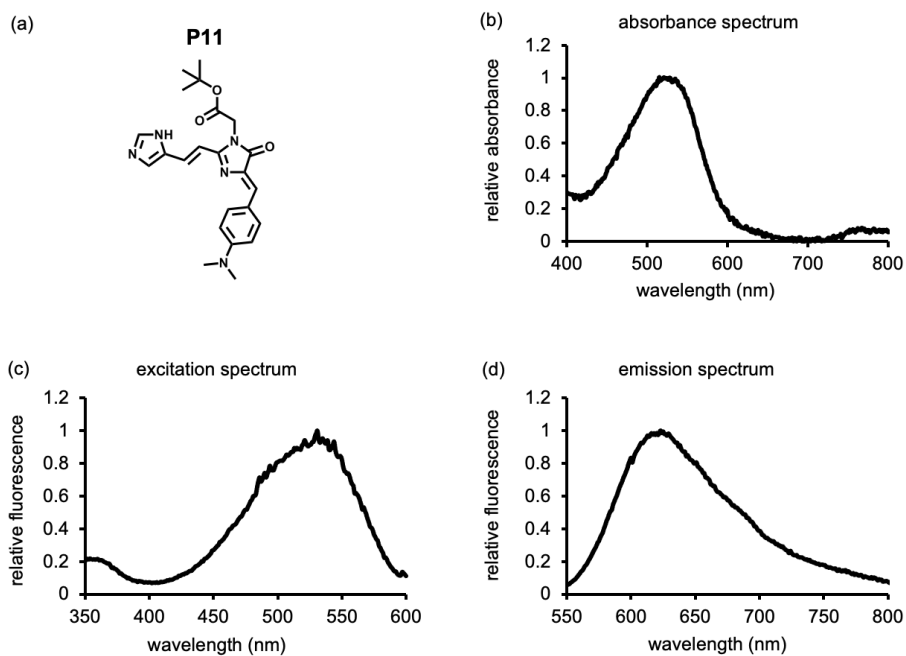

**Figure S11:** a) Structure of AggFluor P11. b) Normalized absorbance spectrum. c) Normalized excitation spectrum. d) Normalized emission spectrum. All spectra were collected using 10  $\mu\text{M}$  compound in 100% glycerol, 25°C.



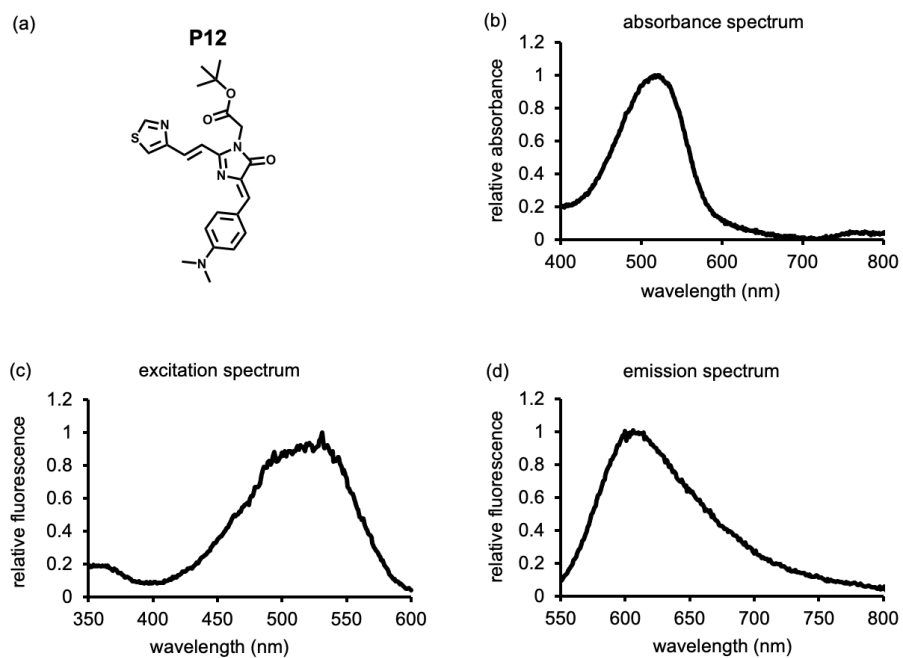

**Figure S12:** a) Structure of AggFluor P12. b) Normalized absorbance spectrum. c) Normalized excitation spectrum. d) Normalized emission spectrum. All spectra were collected using 10  $\mu\text{M}$  compound in 100% glycerol, 25°C.

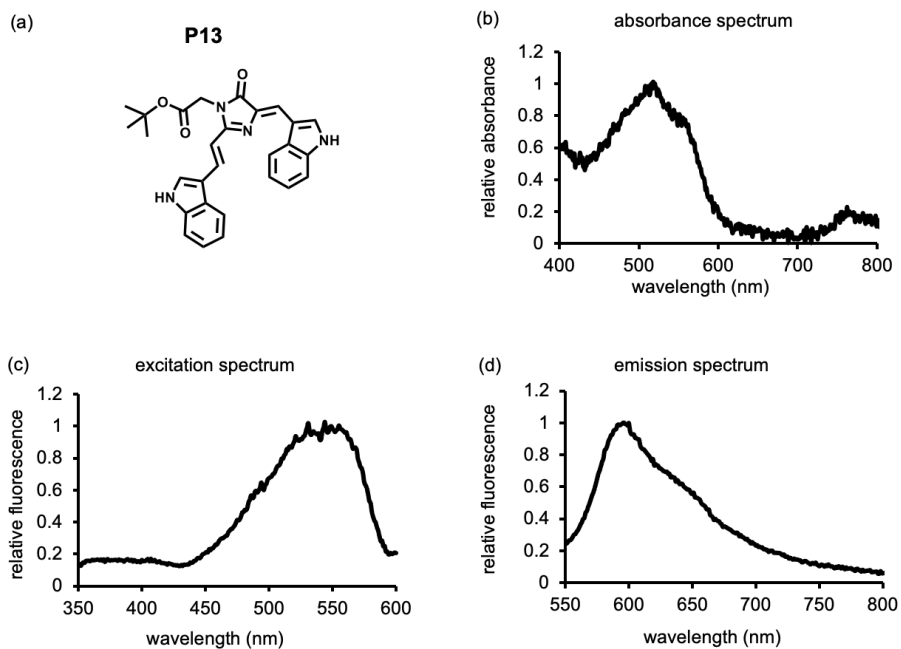

**Figure S13:** a) Structure of AggFluor P13. b) Normalized absorbance spectrum. c) Normalized excitation spectrum. d) Normalized emission spectrum. All spectra were collected using 10  $\mu\text{M}$  compound in 100% glycerol, 25°C.

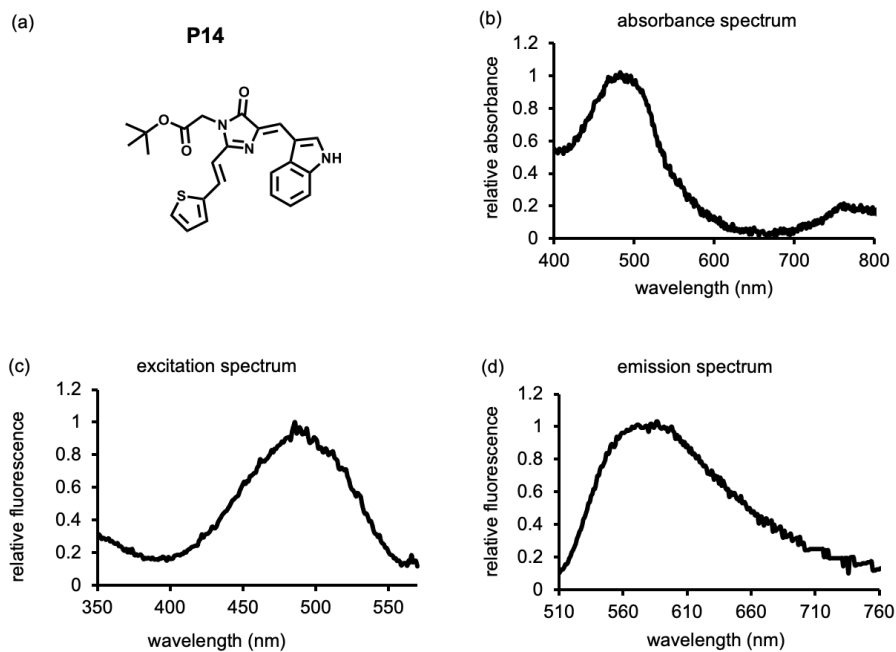

**Figure S14:** **a)** Structure of AggFluor P14. **b)** Normalized absorbance spectrum. **c)** Normalized excitation spectrum. **d)** Normalized emission spectrum. All spectra were collected using 10  $\mu\text{M}$  compound in 100% glycerol, 25°C.

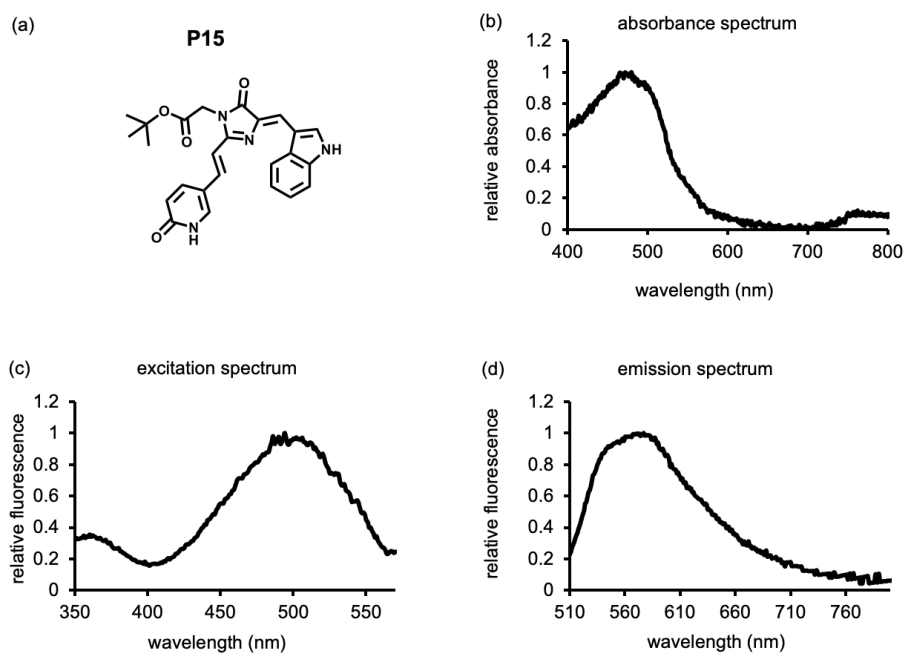

**Figure S15:** a) Structure of AggFluor P15. b) Normalized absorbance spectrum. c) Normalized excitation spectrum. d) Normalized emission spectrum. All spectra were collected using 10  $\mu\text{M}$  compound in 100% glycerol, 25°C.

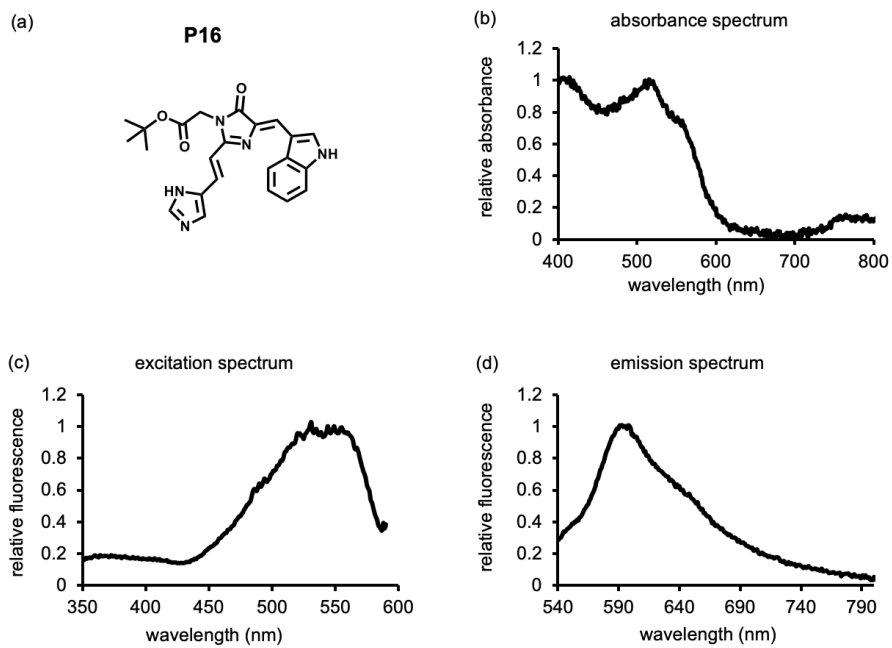

**Figure S16:** **a)** Structure of AggFluor P16. **b)** Normalized absorbance spectrum. **c)** Normalized excitation spectrum. **d)** Normalized emission spectrum. All spectra were collected using 10  $\mu\text{M}$  compound in 100% glycerol, 25°C.

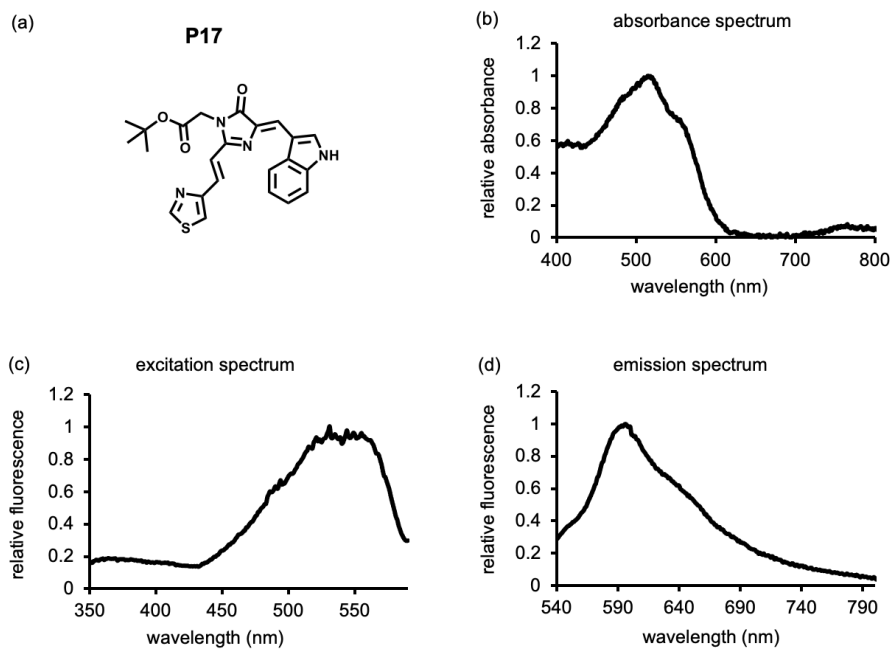

**Figure S17:** **a)** Structure of AggFluor P17. **b)** Normalized absorbance spectrum. **c)** Normalized excitation spectrum. **d)** Normalized emission spectrum. All spectra were collected using 10  $\mu\text{M}$  compound in 100% glycerol, 25°C.

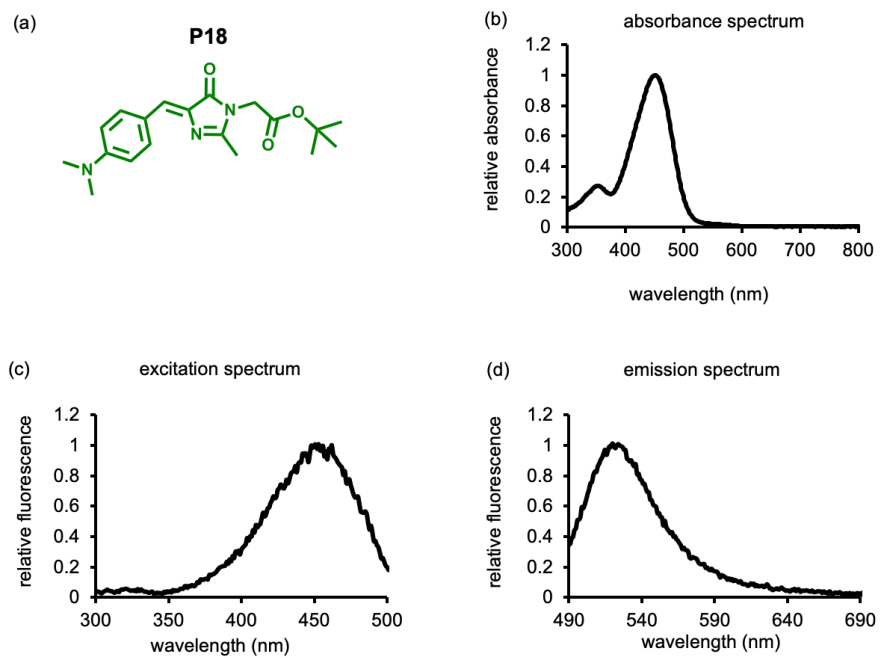

**Figure S18:** **a)** Structure of AggFluor P18. **b)** Normalized absorbance spectrum. **c)** Normalized excitation spectrum. **d)** Normalized emission spectrum. All spectra were collected using 10  $\mu\text{M}$  compound in 100% glycerol, 25°C.

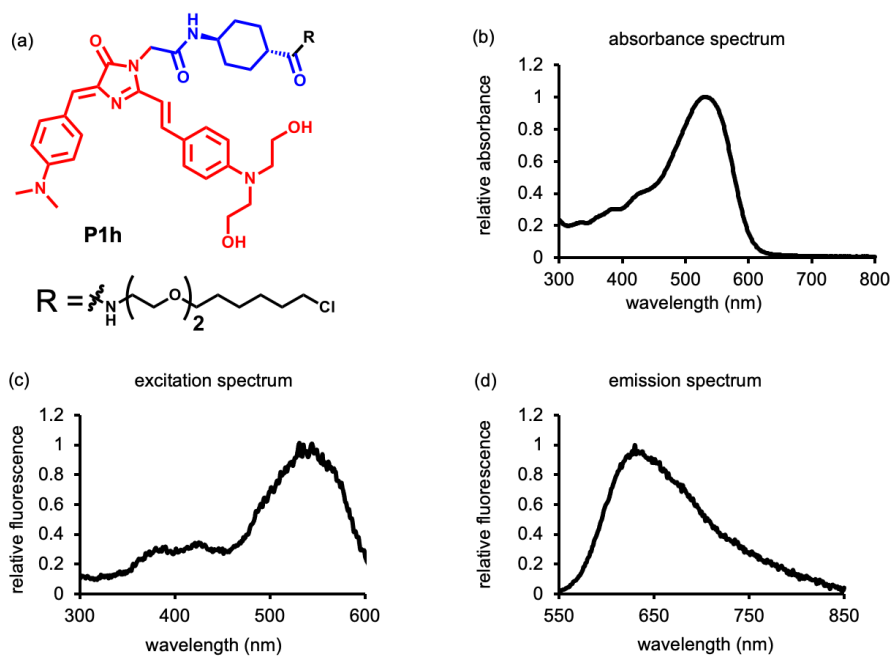

**Figure S19:** **a)** Structure of AggFluor P1h. **b)** Normalized absorbance spectrum. **c)** Normalized excitation spectrum. **d)** Normalized emission spectrum. All spectra were collected using 10  $\mu\text{M}$  compound in 100% glycerol, 25°C.



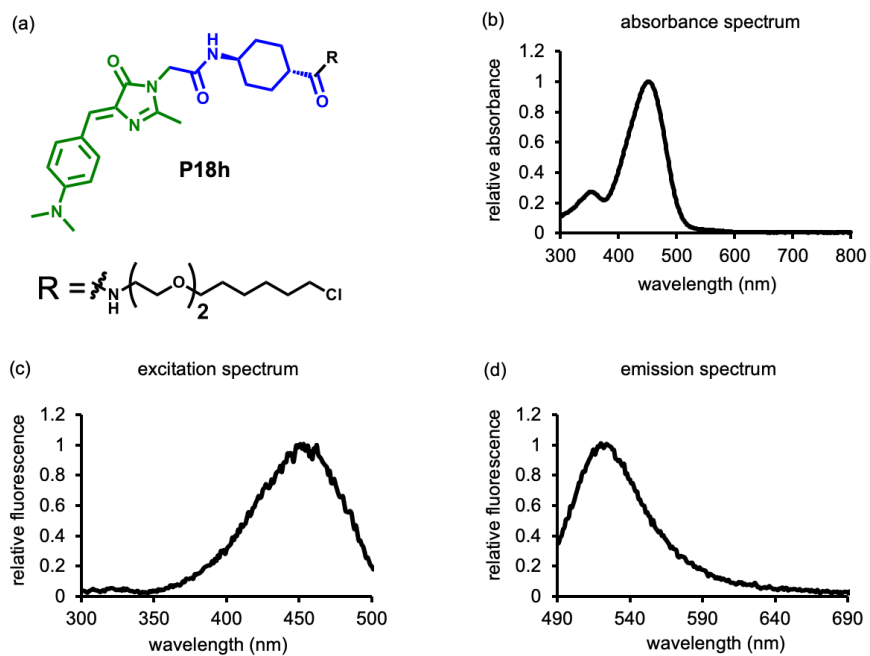

**Figure S20:** **a)** Structure of AggFluor P18h. **b)** Normalized absorbance spectrum. **c)** Normalized excitation spectrum. **d)** Normalized emission spectrum. All spectra were collected using 10  $\mu\text{M}$  compound in 100% glycerol, 25°C.

### 3.2 Viscosity Sensitivity

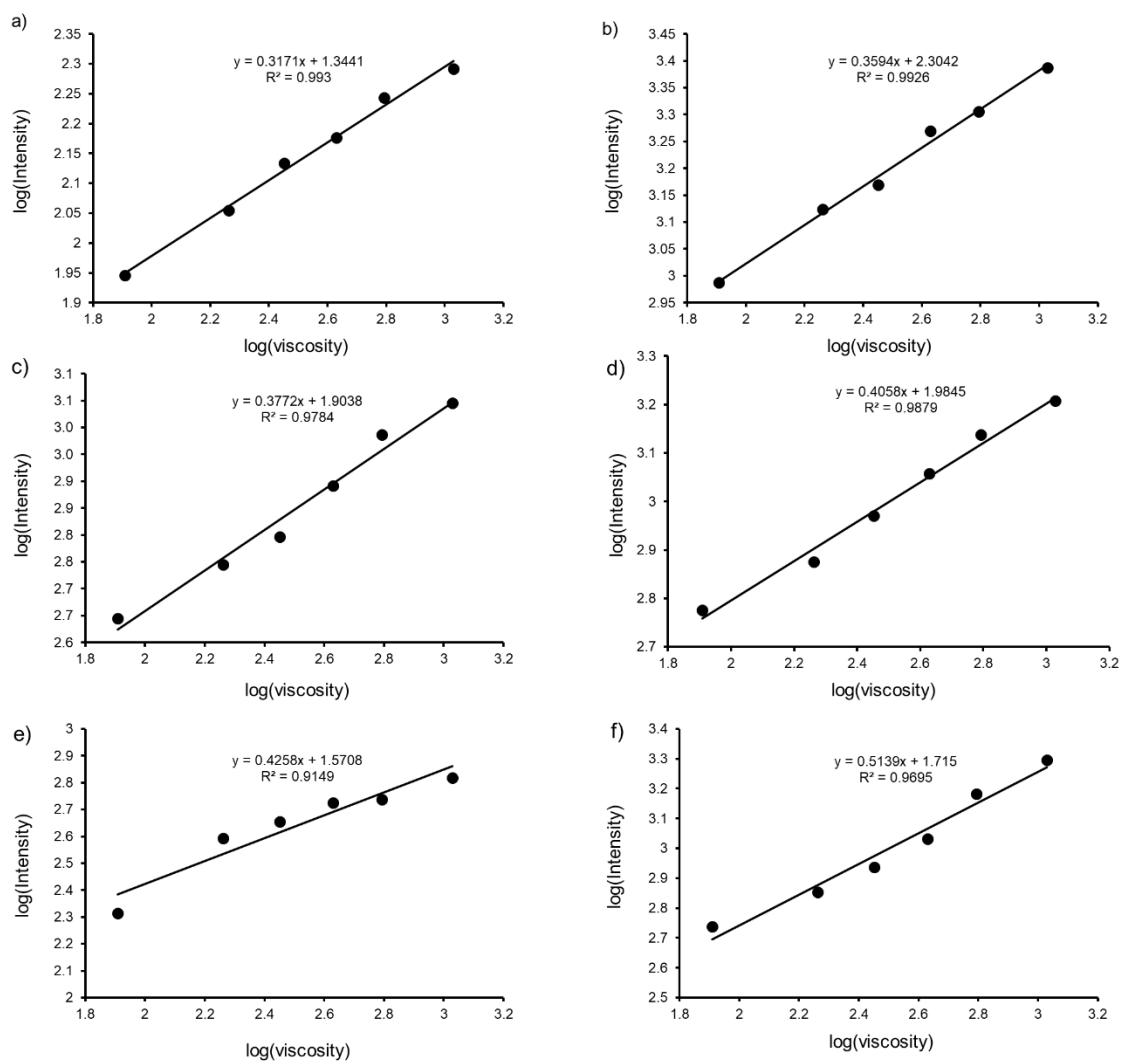

**Figure S21:** Logarithmic plot of fluorescent intensity as a function of solvent viscosity for P2-7: a) P2, b) P3, c) P4, d) P5, e) P6, f) P7. Fluorescence measurement was carried out using 5  $\mu\text{M}$  compounds in a series of ethylene glycol/glycerol (EG/G) solutions in the following mixing ratios: EG/G = 70/30 (81 cP), 50/50 (183 cP), 40/60 (283 cP), 30/70 (426 cP), 20/80 (621 cP), 0/100 (1069 cp).

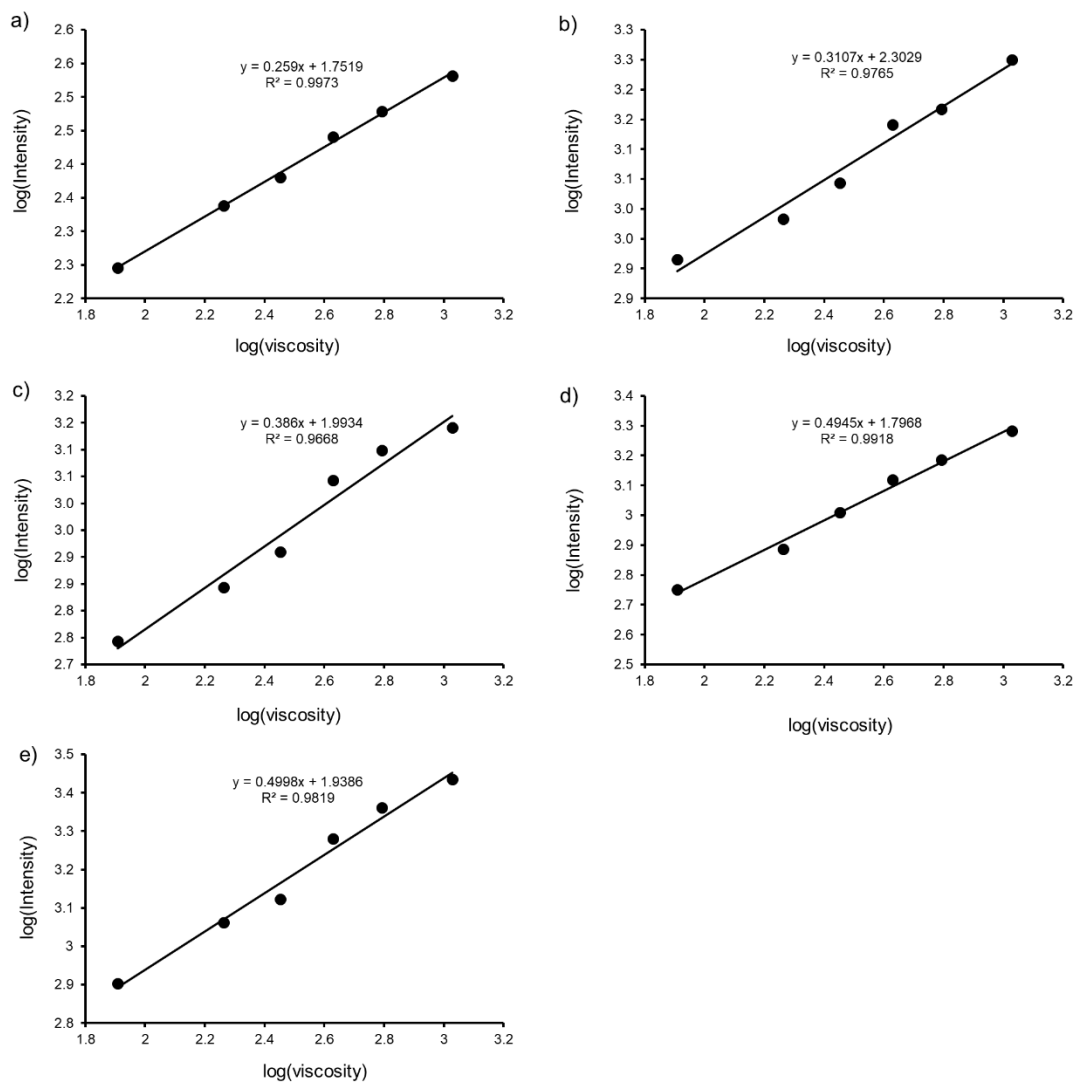

**Figure S22:** Logarithmic plot of fluorescent intensity as a function of solvent viscosity for P8-P12: **a)** P8, **b)** P9, **c)** P10, **d)** P11, **e)** P12. Fluorescence measurement was carried out using 5  $\mu$ M compounds in a series of ethylene glycol/glycerol (EG/G) solutions in the following mixing ratios: EG/G = 70/30 (81 cP), 50/50 (183 cP), 40/60 (283 cP), 30/70 (426 cP), 20/80 (621 cP), 0/100 (1069 cp).

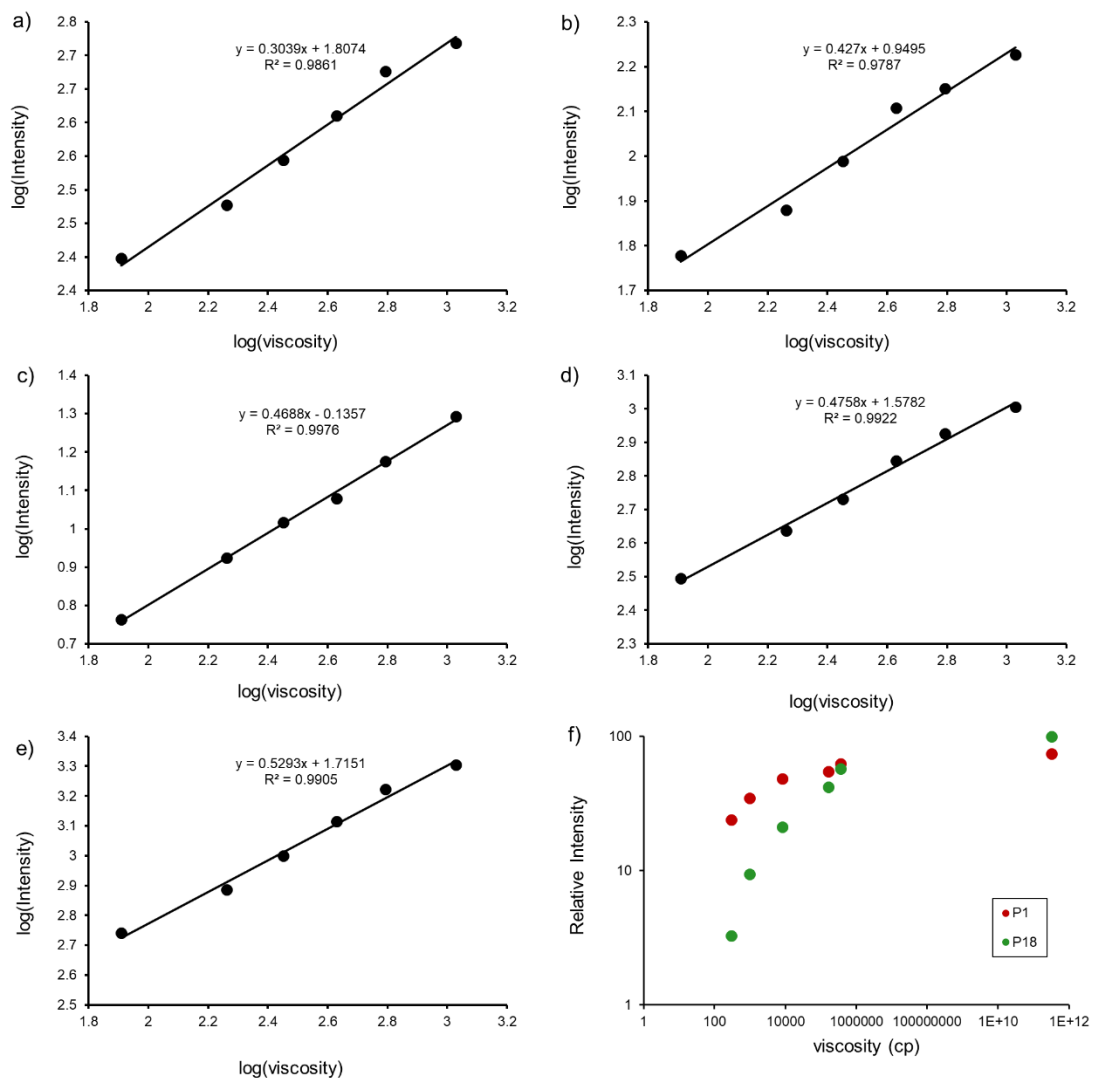

**Figure S23:** Logarithmic plot of fluorescent intensity as a function of solvent viscosity for P13-17: **a)** P13, **b)** P14, **c)** P15, **d)** P16, **e)** P17. Fluorescence measurement was carried out using 5  $\mu$ M compounds in a series of ethylene glycol/glycerol (EG/G) solutions in the following mixing ratios: EG/G = 70/30 (81 cP), 50/50 (183 cP), 40/60 (283 cP), 30/70 (426 cP), 20/80 (621 cP), 0/100 (1069 cp). **f)** Logarithmic plot of fluorescent intensity as a function of solvent viscosity for P1 and P18. Fluorescence measurement was carried out using 5  $\mu$ M compounds in pure glycerol at various temperatures: 37  $^{\circ}$ C, 22  $^{\circ}$ C, 4  $^{\circ}$ C, 0  $^{\circ}$ C, -30  $^{\circ}$ C and -80  $^{\circ}$ C.

### 3.3 In vitro Protein Aggregation Assays

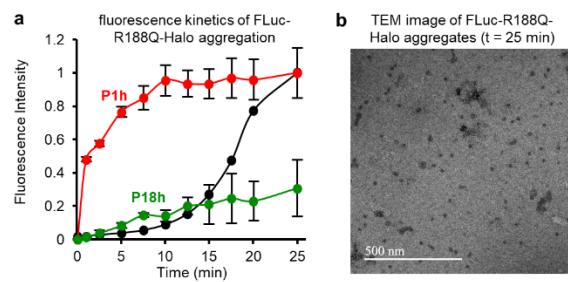

**Figure S24:** a) Fluorescence and turbidity kinetics of heat-induced FLuc-R188Q-Halo aggregation at 57°C, 25  $\mu$ M proteins and 5  $\mu$ M probes. b) TEM images of FLuc-R188Q-Halo aggregates exhibited dispersed and loosely packed structures (57°C, 25  $\mu$ M proteins, 20 min).

### 3.4 Confocal Fluorescence Microscopy

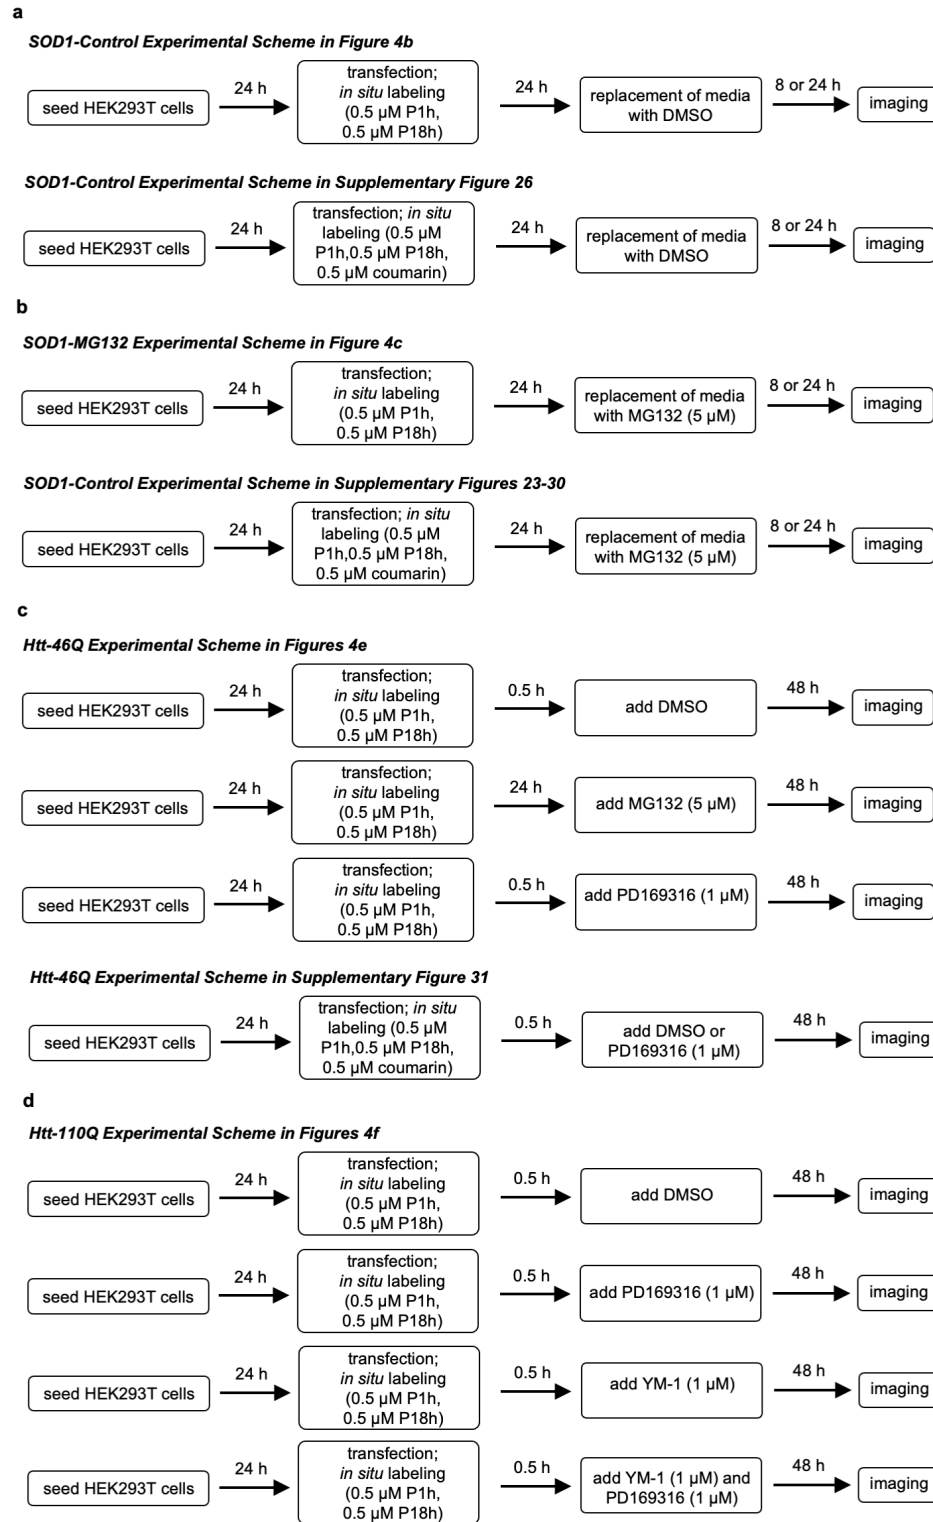

**Figure S25:** Experimental scheme for confocal fluorescence microscopy experiments.

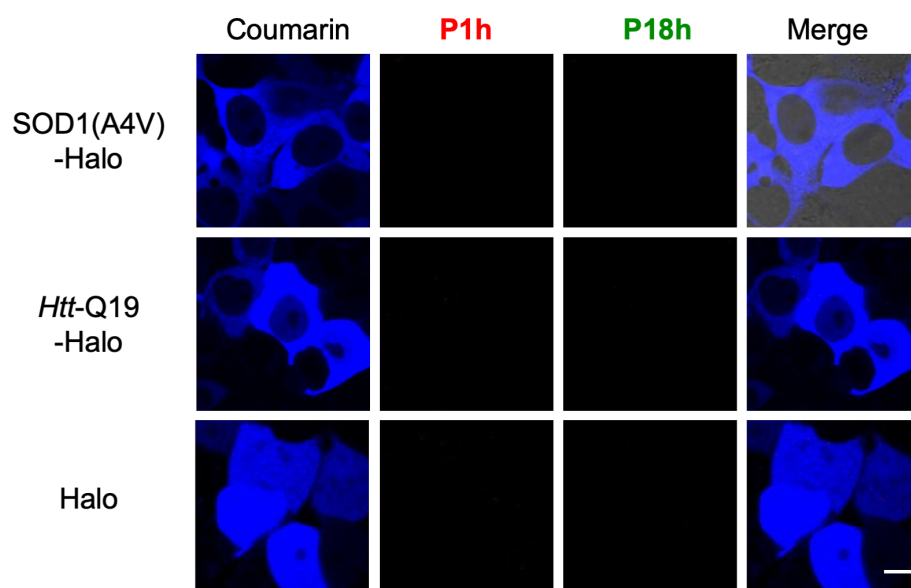

**Figure S26:** The SOD1(A4V)-Halo, Htt-Q19-Halo and Halo proteins were transiently transfected and expressed in HEK293T cells for 24 h, in the presence of 0.5  $\mu$ M coumarin Halo-Tag ligand, 0.5  $\mu$ M P1h and 0.5  $\mu$ M P18h. Prior to imaging, excess probes were washed away by incubating cells with fresh DMEM media for 30 min at 37  $^{\circ}$ C. Only diffuse coumarin fluorescence was observed in cells expressing the POI and no turn-on fluorescence of P1h or P18h was found. Blue: coumarin Halo-Tag ligand. Red: P1h. Green: P18h. Scale bar: 5  $\mu$ m.

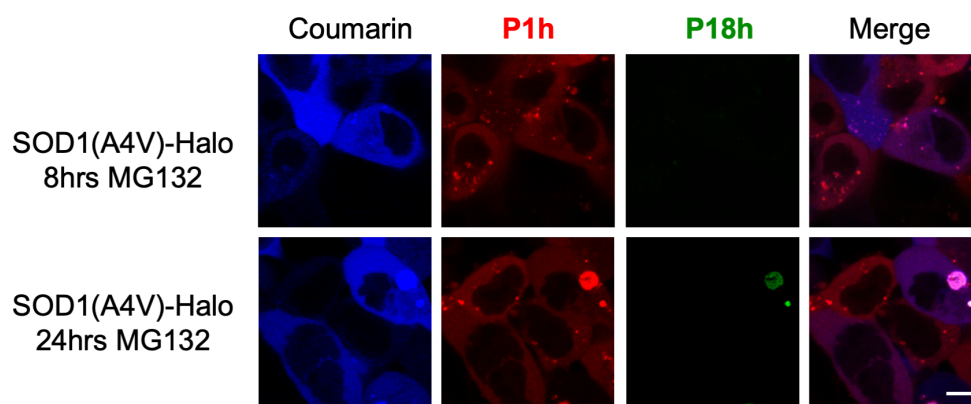

**Figure S27:** SOD1(A4V)-Halo was transiently transfected and expressed in HEK293T cells for 24 h, in the presence of 0.5  $\mu$ M coumarin Halo-Tag ligand, 0.5  $\mu$ M P1h and 0.5  $\mu$ M P18h. Then, cells were replaced into fresh DMEM media containing 5  $\mu$ M MG132 to induce proteome aggregation. Cells were treated for 8 or 24 h prior to fluorescence confocal microscopy. Before imaging, excess probes were washed away by incubating cells with fresh DMEM media for 30 min at 37 °C. Cells stressed with MG132 for 8hrs showed a turn-on fluorescence of P1h, signifying the formation of soluble oligomeric protein aggregates. Whereas, no P18h fluorescence was found at this condition. By contrast, the 24-h stress condition induced turn-on fluorescence of both P1h and P18h, wherein the green fluorescent turn-on of P18h was only found in aggresomes. Blue: coumarin Halo-Tag ligand. Red: P1h. Green: P18h. Scale bar: 5  $\mu$ m.



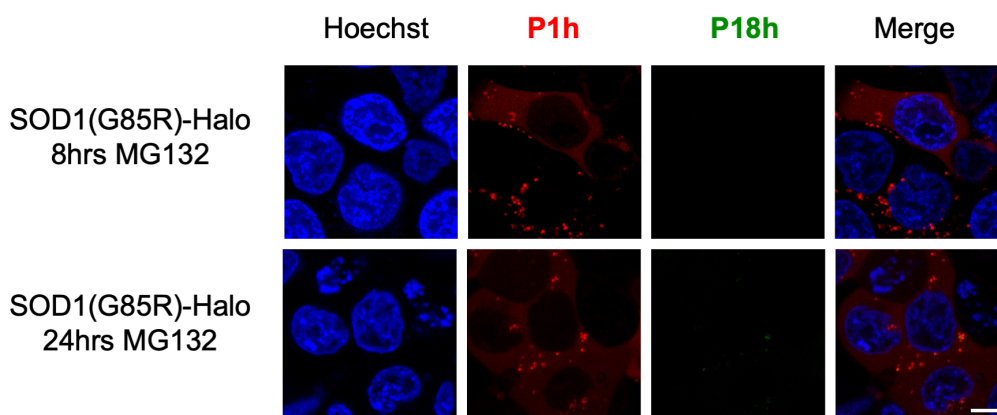

**Figure S28:** SOD1(G85R)-Halo was transiently transfected and expressed in HEK293T cells for 24 h, in the presence of 0.5  $\mu$ M P1h and 0.5  $\mu$ M P18h. Then, cells were replaced into fresh DMEM media containing 5  $\mu$ M MG132 to induce proteome aggregation. Cells were treated for 8 or 24 h prior to fluorescence confocal microscopy. Before imaging, excess probes were washed away by incubating cells with fresh DMEM supplemented with 0.1  $\mu$ g/mL Hoechst 33342 for 30 min at 37  $^{\circ}$ C. Cells stressed with MG132 for 8hrs showed a turn-on fluorescence of P1h, signifying the formation of soluble oligomeric protein aggregates. Whereas, no P18h fluorescence was found at this condition. The 24-h stress condition induced turn-on fluorescence of P1h. However, the green fluorescent turn-on of P18h was rarely found. Blue: Hoechst 33342. Red: P1h. Green: P18h. Scale bar: 5  $\mu$ m.

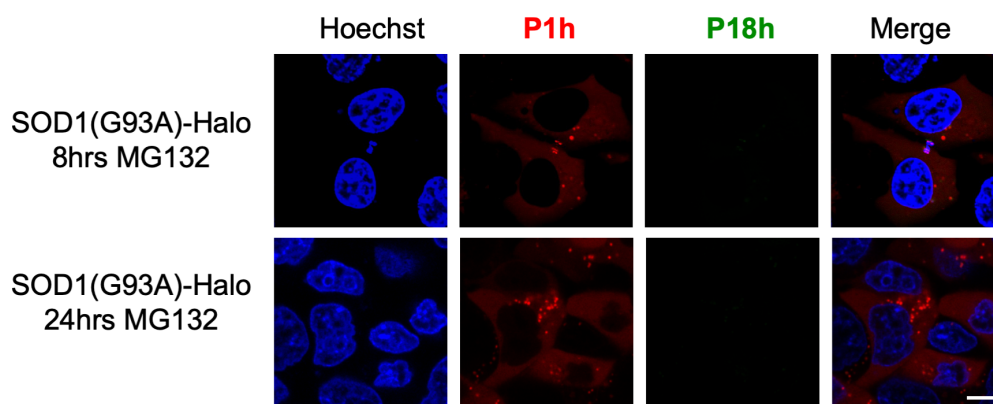

**Figure S29:** SOD1(G93A)-Halo was transiently transfected and expressed in HEK293T cells for 24 h, in the presence of 0.5  $\mu$ M P1h and 0.5  $\mu$ M P18h. Then, cells were replaced into fresh DMEM media containing 5  $\mu$ M MG132 to induce proteome aggregation. Cells were treated for 8 or 24 h prior to fluorescence confocal microscopy. Before imaging, excess probes were washed away by incubating cells with fresh DMEM supplemented with 0.1  $\mu$ g/mL Hoechst 33342 for 30 min at 37  $^{\circ}$ C. Cells stressed with MG132 for 8hrs showed a turn-on fluorescence of P1h, signifying the formation of soluble oligomeric protein aggregates. Whereas, no P18h fluorescence was found at this condition. The 24-h stress condition induced turn-on fluorescence of P1h. However, no P18h fluorescence was found. Blue: Hoechst 33342. Red: P1h. Green: P18h. Scale bar: 5  $\mu$ m.

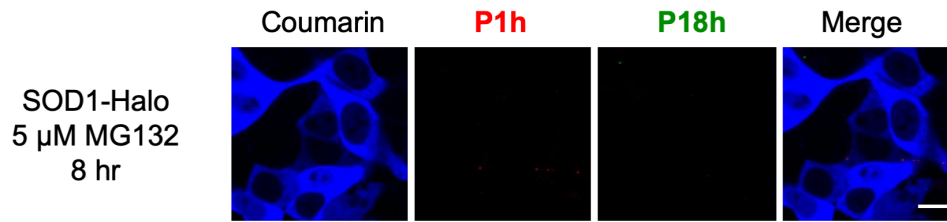

**Figure S30:** SOD1(WT)-Halo was transiently transfected and expressed in HEK293T cells for 24 h, in the presence of 0.5  $\mu$ M coumarin Halo-Tag ligand, 0.5  $\mu$ M P1h and 0.5  $\mu$ M P18h. Subsequently, excess probes were washed away by incubating cells with fresh DMEM media for 30 min at 37  $^{\circ}$ C. Then, cells were replaced into fresh DMEM media containing 5  $\mu$ M MG132 to induce proteome aggregation. Cells were treated for 8 h prior to fluorescence confocal microscopy. Only diffuse coumarin fluorescence was observed and no turn-on fluorescence of P1h or P18h was found. Blue: coumarin Halo-Tag ligand. Red: fluorescence of P1h. Green: fluorescence of P18h. Scale bar: 5  $\mu$ m.

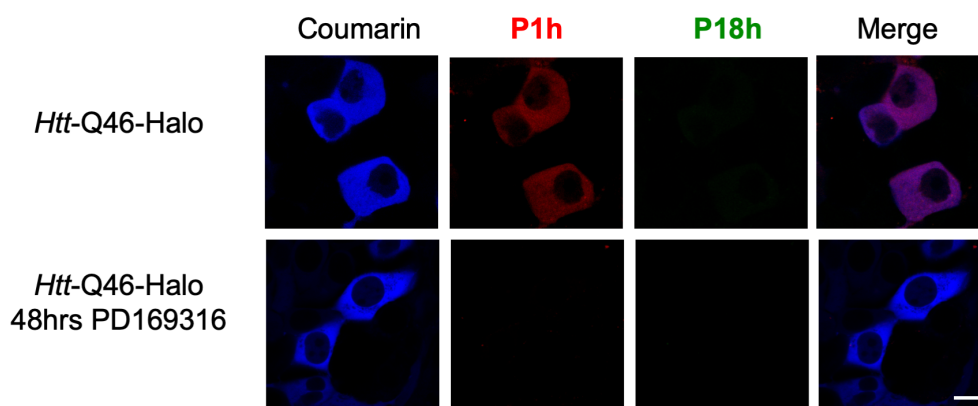

**Figure S31:** Htt-Q46-Halo was transiently transfected and expressed in HEK293T cells for 48 h, with or without 1  $\mu$ M PD169316, in the presence of 0.5  $\mu$ M coumarin Halo-Tag ligand, 0.5  $\mu$ M P1h and 0.5  $\mu$ M P18h. Subsequently, excess probes were washed away by incubating cells with fresh DMEM media for 30 min at 37 °C. Cells expressing Htt-Q46-Halo, which is known to form predominantly soluble oligomeric protein species, show diffuse coumarin fluorescence along with an obvious turn-on of red fluorescence of P1h, with not fluorescence from P18h. In the presence of PD169316, cells show only diffusive coumarin fluorescence, indicating presence of proteins. However, there was no fluorescence observed in the channels of P1h and P18h, indicating the clearance of protein aggregates. Blue: coumarin Halo-Tag ligand. Red: fluorescence of P1h. Green: fluorescence of P18h. Scale bar: 5  $\mu$ m.

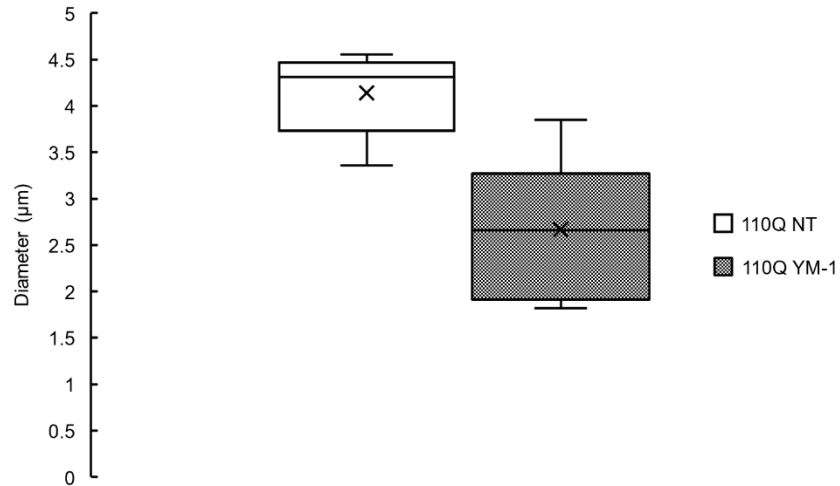

**Figure S32:** Htt-Q110-Halo was transiently transfected and expressed in HEK293T cells for 48 h with or without 1  $\mu\text{M}$  of Hsp70 activator YM-1, in the presence of 0.5  $\mu\text{M}$  of P1h and 0.5  $\mu\text{M}$  of P18h. Subsequently, excess probes were washed away by incubating cells with fresh DMEM media for 30 min at 37  $^{\circ}\text{C}$ . Using Zen Blue profile application, the pixel length of the 110Q puncta was determined using green fluorescence from P18h, which was then converted to the unit of nm using ratio of 0.07 $\mu\text{m}$ /pixel. The average diameter of non-treated 110Q puncta was determined to be  $4.1 \pm 0.45 \mu\text{m}$  and YM-1 treated 110Q puncta showed average diameter of  $2.6 \pm 0.75 \mu\text{m}$ . (n = 6 for each)

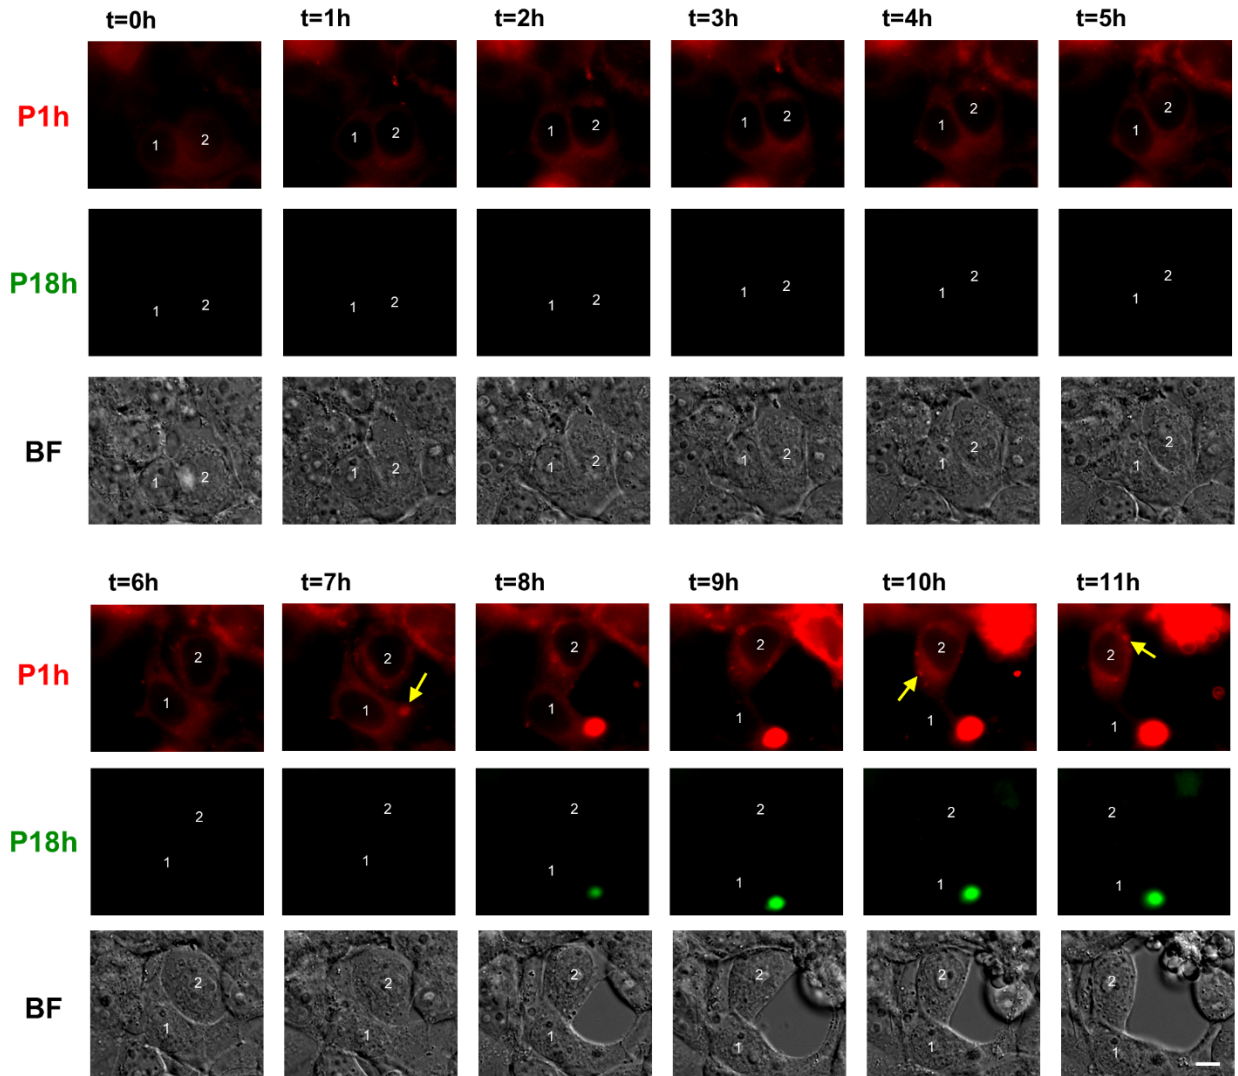

**Figure S33:** Htt-Q72-Halo was transiently transfected and expressed in HEK293T cells for 36 h in the presence of 0.5  $\mu$ M P1h and 0.5  $\mu$ M P18h. Then, cells were replaced into fresh DMEM media containing 5  $\mu$ M MG132 to induce proteome aggregation and imaged over the course of 12 h. The time-lapse imaging experiment revealed that misfolding oligomers appear first, with diffuse P1h signal observed the beginning of imaging. At the 7-h time point, the P1h signal shows that misfolded oligomers begin to condense to form aggresome-like structures near the nucleus. Signal from P18h started to appear around the 8-h time point and the signal originated from the core of the aggresome. In addition to aggresomes, small puncta structures with no P18h green fluorescence were also found at final time points at 10 or 11 h, suggesting that these granules containing misfolded oligomers were in the process to form insoluble aggregates. Red: fluorescence of P1h. Green: fluorescence of P18h. Scale bar: 5  $\mu$ m.

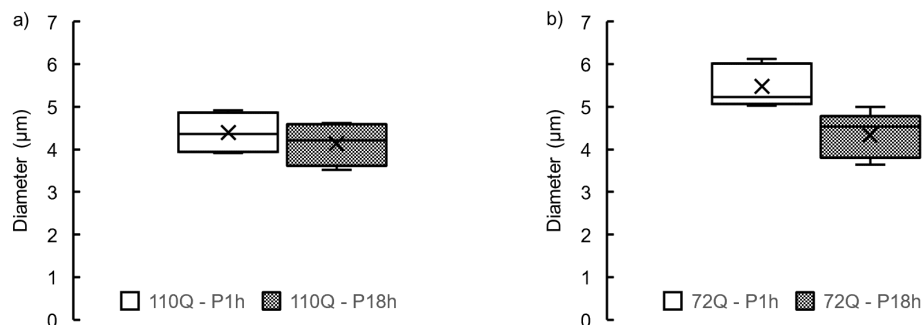

**Figure S34: a)** Htt-Q110-Halo was transiently transfected and expressed in HEK293T cells for 48 h in the presence of 0.5  $\mu\text{M}$  of P1h and 0.5  $\mu\text{M}$  of P18h. Then, cells were replaced into fresh DMEM and imaged. Cells expressing Htt-Q110-Halo formed perinuclear granular aggregates that are detected by P1h and P18h. The average diameter 110Q puncta determined via P1h fluorescence to be  $4.4 \pm 0.43 \mu\text{m}$  and by P18h fluorescence had an average diameter of  $4.1 \pm 0.45 \mu\text{m}$  ( $n = 6$  for each). **b)** Htt-Q72-Halo was transiently transfected and expressed in HEK293T cells for 36 h in the presence of 0.5  $\mu\text{M}$  of P1h and 0.5  $\mu\text{M}$  of P18h. Then, cells were replaced into fresh DMEM media containing 5  $\mu\text{M}$  MG132 to induce proteome aggregation and imaged after 12 h. Cells expressing Htt-Q72-Halo, which is known to form mainly soluble oligomeric protein species, which can be driven to form perinuclear granular aggregates that are detected by P1h and P18h. Using Zen Blue profile analyses, the average diameter of MG132 induced 72Q puncta determined via P1h fluorescence to be  $5.5 \pm 0.50 \mu\text{m}$  and by P18h fluorescence had an average diameter of  $4.3 \pm 0.54 \mu\text{m}$  ( $n = 6$  for each).

## 4. Synthetic Methods and Schemes

### 4.1 General Methods.

All reagents and anhydrous solvents of commercial grade were used as received unless otherwise states. Reaction progress was monitored by thin layer chromatography (TLC) analysis using Silicycle® glass backed, extra hard sheets (60 Å, 250 µm thickness). Reaction components were detected by UV-absorption (254 or 365 nm) or by the indicated stain. Purifications by way of flash column chromatography were completed using SiliaFlash® F60 (40-63 µm) eluting with the indicated solvent mixture. <sup>1</sup>H-NMR and <sup>13</sup>C-NMR characterization of isolated products was completed using a Bruker AV-III-HD-500 spectrometer in chloroform-*d* (CDCl<sub>3</sub>) or *d*<sub>6</sub>-dimethylsulfoxide (DMSO-*d*<sub>6</sub>) unless otherwise noted. Chemical shifts (δ) are reported relative to a tetramethylsilane (TMS) standard (δ 0.00 ppm) or to that of the solvent residual peak. Coupling constants (*J*) are reported in Hz. All <sup>13</sup>C-NMR spectra are reported as proton decoupled. High resolution mass spectrometry was completed with a Waters Q-TOF Premier quadrupole/time-of-flight (TOF) mass spectrometer. M



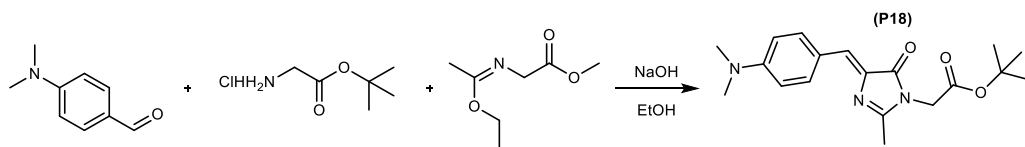

**Scheme S1:** Synthesis of P18

Conditions: glycine *tert*-butyl ester hydrochloride (183.7 mg, 1.1 mmol) was combine with NaOH (39.9 mg, 1 mmol) in EtOH (2 mL) and stirred for 1 hr. at room temperature. 4-(Dimethylamino)benzaldehyde (149.0 mg, 1.0 mmol) was added and stirred overnight and 25°C. Methyl (Z)-2-((1-ethoxyethylidene)amino)acetate (159mg, 1.0 mmol) was prepared according to literature and added in one portion<sup>11</sup>. The reaction was stirred overnight at 25°C, was then quenched by water (5 mL) and extracted with ether (3x10 mL). The organic fraction was collected and dried in vacuo. Compounds were further purified by flash chromatography (50% Ethyl Acetate, 50% Hexanes) to yield P18 an orange solid.

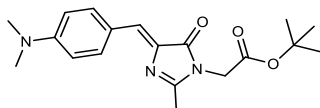

**P18:** (Z)-*tert*-butyl 2-(4-(4-(dimethylamino)benzylidene)-2-methyl-5-oxo-4,5-dihydro-1H-imidazol-1-yl)acetate. Crystalline orange solid (63%).

<sup>1</sup>H NMR (500 MHz, Chloroform-*d*) δ 8.07 (d, *J* = 8.9 Hz, 2H), 7.11 (s, 1H), 6.70 (d, *J* = 8.8 Hz, 2H), 4.29 (s, 2H), 3.05 (s, 6H), 2.31 (s, 3H), 1.48 (s, 9H). <sup>13</sup>C NMR (126 MHz, Chloroform-*d*) δ 170.12, 166.91, 158.04, 151.58, 134.28, 134.24, 129.42, 122.20, 111.73, 82.84, 42.15, 40.05, 27.99, 15.43. [M+H] Calcd, 344.1896; Obsd, 344.1983

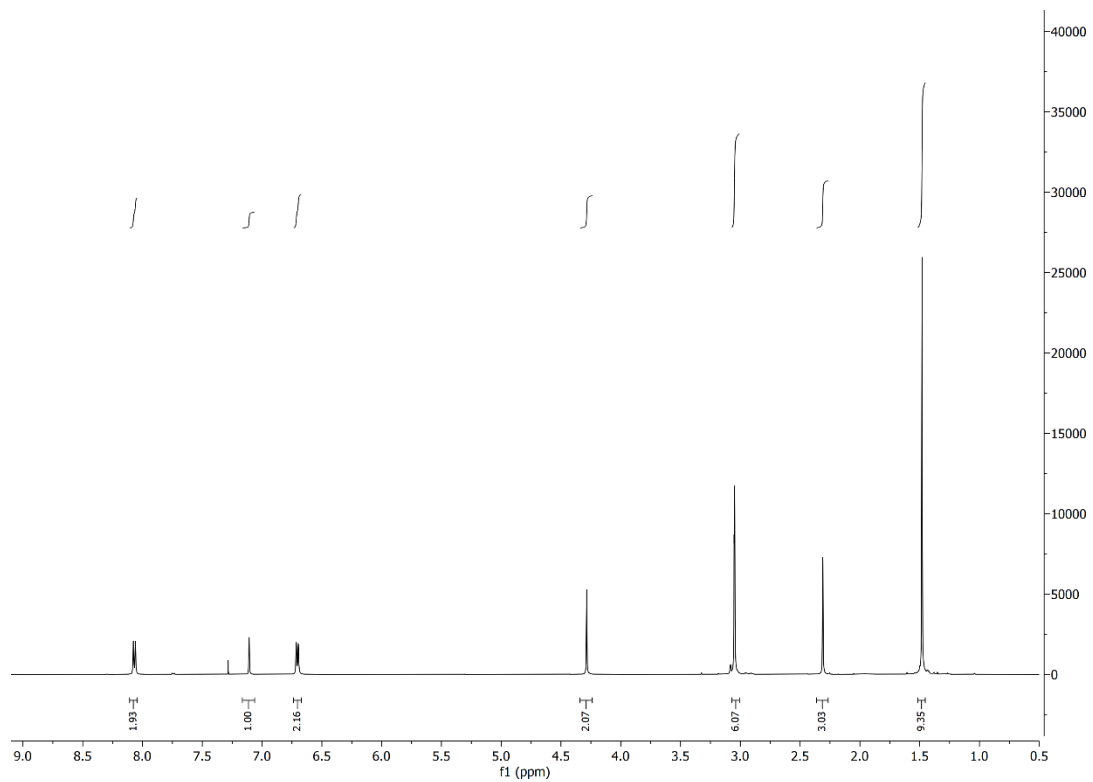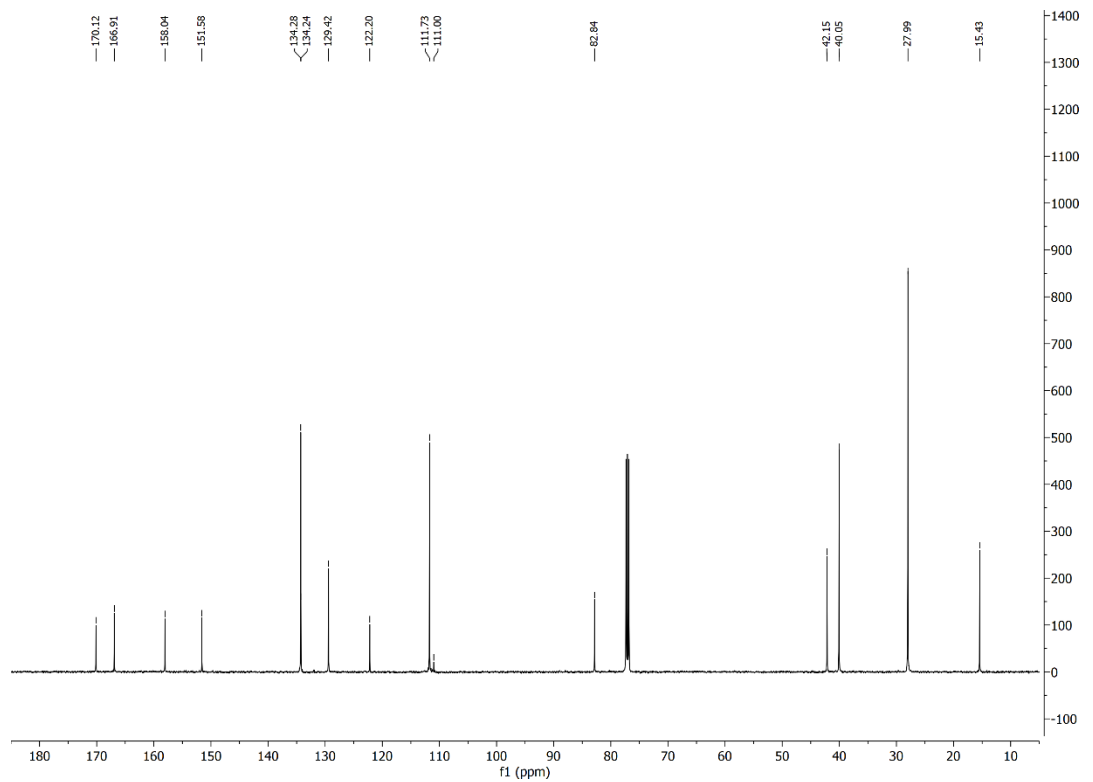

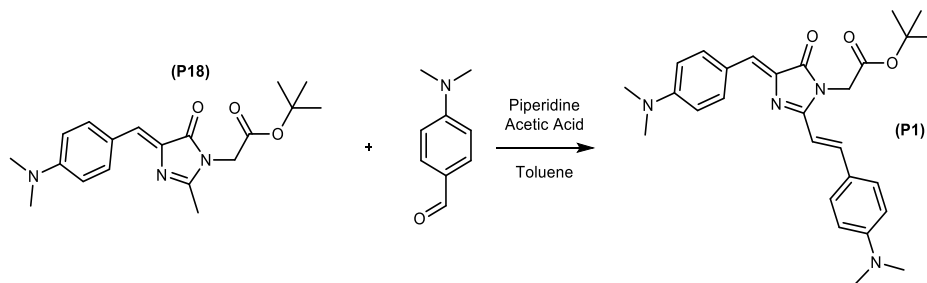

**Scheme S2:** Synthesis of P1

Conditions: 4-(Dimethylamino)benzaldehyde (223.3 mg, 1.5 mmol), P18 (343.0 mg, 1.0 mmol) were combine in toluene (2 mL) under Argon. Piperidine (824  $\mu$ L, 8.0 mmol) and then acetic acid (458  $\mu$ L, 8.0 mmol) were added and the reaction was refluxed at 110°C overnight. Solvent was removed and was purified by flash chromatography (50% Ethyl Acetate, 50% Hexanes) to yield P1 a red solid.

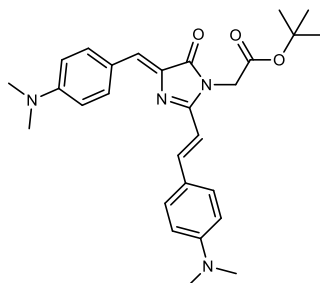

**P1:** Tert-butyl 2-((Z)-4-(4-(dimethylamino)benzylidene)-2-((E)-4-(dimethylamino)styryl)-5-oxo-4,5-dihydro-1H-imidazol-1-yl)acetate. Red Solid (44%).

$^1\text{H}$  NMR (500 MHz, Chloroform-*d*)  $\delta$  8.19 (d,  $J$  = 8.6 Hz, 2H), 7.97 (d,  $J$  = 15.6 Hz, 1H), 7.48 (d,  $J$  = 8.7, 2H), 7.12 (s, 1H), 6.75 (d,  $J$  = 8.6, 2H), 6.70 (d,  $J$  = 8.6, 2H), 6.42 (d,  $J$  = 15.6 Hz, 1H), 4.45 (s, 2H), 3.07 (s, 6H), 3.05 (s, 6H), 1.49 (m, 9H).  $^{13}\text{C}$  NMR (126 MHz, Chloroform-*d*)  $\delta$  170.38, 167.13, 156.62, 151.44, 151.35, 139.94, 135.55, 134.32, 129.42, 127.64, 123.54, 123.22, 111.96, 111.86, 111.72, 107.59, 82.73, 42.38, 40.17, 40.11, 40.03, 28.03, 28.01, 27.98. [M+H] Calcd, 475.2664; Obsd, 475.3517

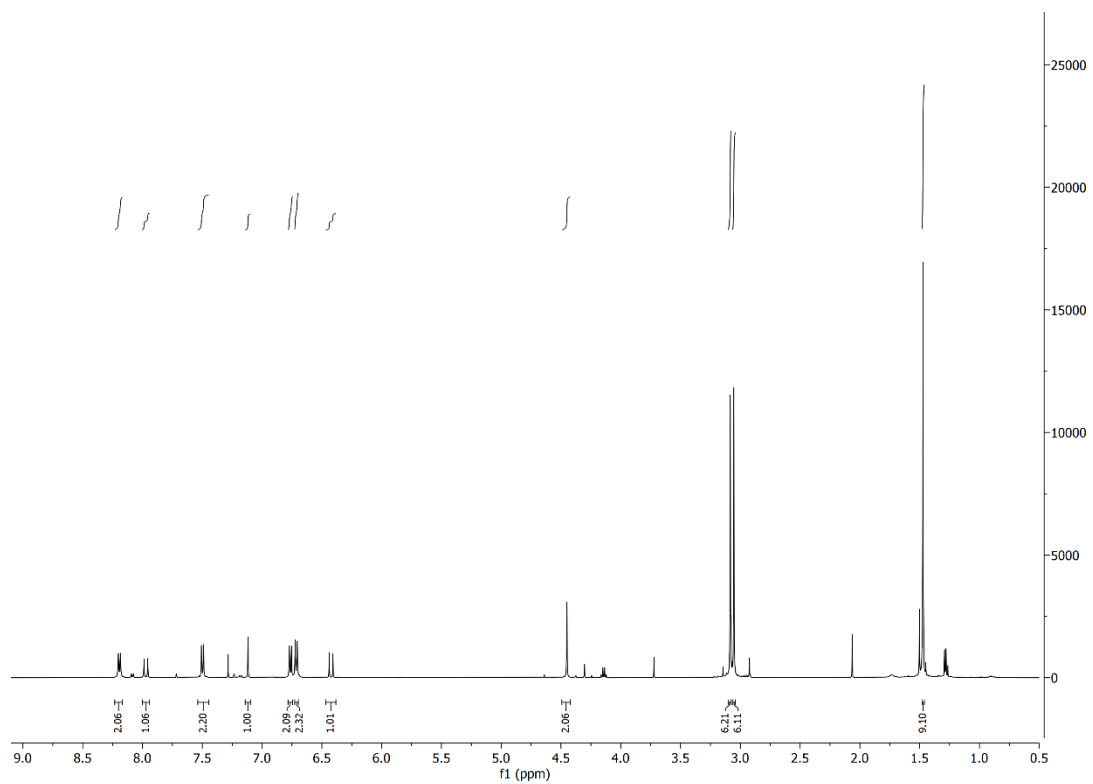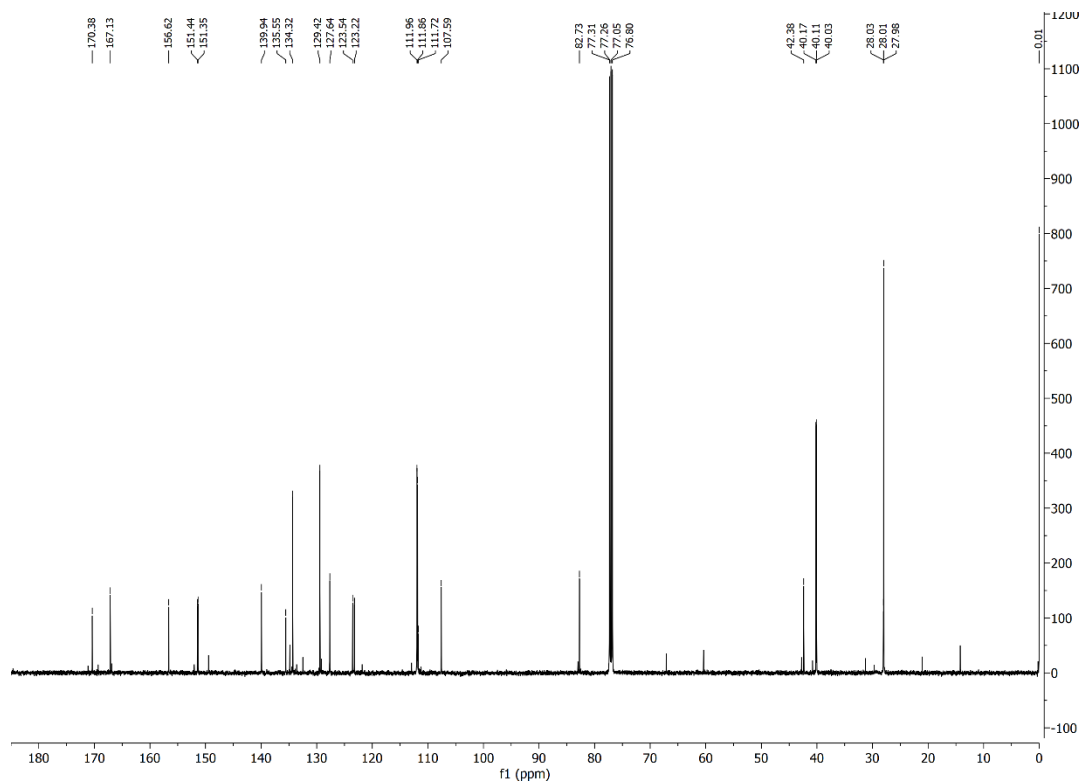

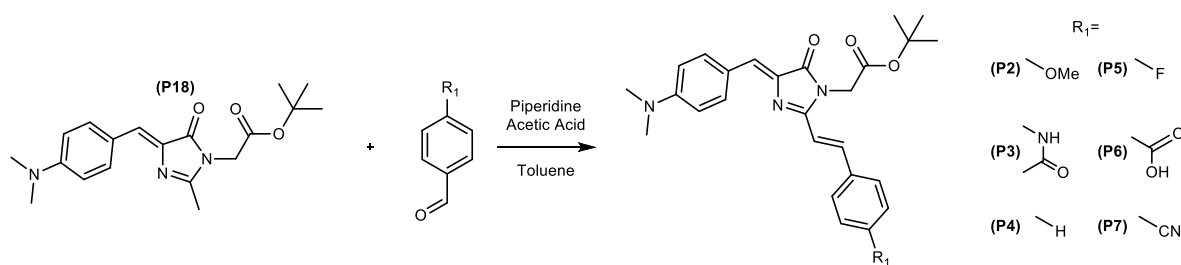

**Scheme S3:** Synthesis of P2-P7

Conditions: benzaldehyde (1.5 mmol), P18 (343.0 mg, 1 mmol) were combine in toluene (2 mL) under Argon. Piperidine (824  $\mu$ L, 8.0 mmol) and then acetic acid (458  $\mu$ L, 8.0 mmol) were added and the reaction was refluxed at 110°C overnight. Solvent was removed and was purified by flash chromatography (various conditions) to yield P2-P7.

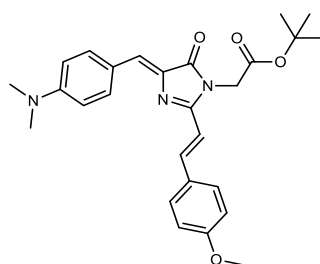

**P2: Tert-butyl 2-(4-((Z)-4-(dimethylamino)benzylidene)-2-((E)-4-methoxystyryl)-5-oxo-4,5-dihydro-1H-imidazol-1-yl)acetate.** Red Solid (37%).

$^1\text{H}$  NMR (500 MHz,  $\text{CDCl}_3$ )  $\delta$  8.20 (d,  $J$  = 8.6 Hz, 2H), 7.98 (d,  $J$  = 15.7 Hz, 1H), 7.55 (d, 2H), 7.17 (s, 1H), 6.95 (d, 2H), 6.77 (d,  $J$  = 8.9 Hz, 2H), 6.53 (d,  $J$  = 15.7 Hz, 1H), 4.46 (s, 2H), 3.88 (s, 3H), 3.10 (s, 6H), 1.48 (s, 9H).  $^{13}\text{C}$  NMR (126 MHz,  $\text{CDCl}_3$ )  $\delta$  134.56, 129.31, 114.43, 111.84, 55.42, 40.12, 31.95, 29.72, 27.98, 22.71, 14.15, 1.04.  $[\text{M}+\text{H}]$  Calcd, 462.2388; Obsd, 462.2385

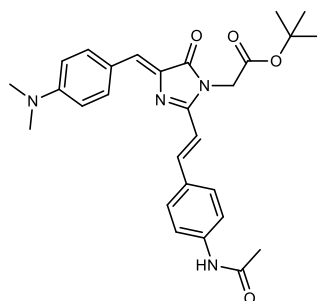

**P3: tert-butyl 2-(2-((E)-4-acetamidostyryl)-4-((Z)-4-(dimethylamino)benzylidene)-5-oxo-4,5-dihydro-1H-imidazol-1-yl)acetate.** Red Solid (31%).

$^1\text{H}$  NMR (500 MHz,  $\text{CDCl}_3$ )  $\delta$  8.33 (s, 1H), 8.10 (d,  $J = 6.6$  Hz, 2H), 8.03 (d,  $J = 15.9, 2.5$  Hz, 1H), 7.58 (d,  $J = 7.7$  Hz, 2H), 7.51 (d,  $J = 7.9$  Hz, 2H), 7.19 (s, 1H), 6.76 (d,  $J = 8.6, 3.4$  Hz, 2H), 6.58 (d,  $J = 15.8, 4.4$  Hz, 1H), 4.51 (s, 2H), 3.10 (s, 6H), 2.21 (s, 3H), 1.49 (s, 9H).  $^{13}\text{C}$  NMR (126 MHz,  $\text{CDCl}_3$ )  $\delta$  166.66, 155.62, 152.03, 134.96, 130.11, 129.89, 129.12, 122.06, 119.86, 112.08, 111.76, 84.35, 83.45, 42.36, 40.22, 40.19, 29.72, 27.98, 24.66, 22.71, 14.15.  $[\text{M}+\text{H}]$  Calcd, 489.2497; Obsd, 489.2496

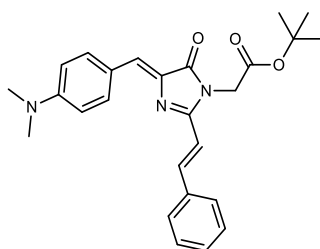

**P4: Tert-butyl 2-(4-((Z)-4-(dimethylamino)benzylidene)-5-oxo-2-((E)-styryl)-4,5-dihydro-1H-imidazol-1-yl)acetate.** Red solid (15%).

$^1\text{H}$  NMR (500 MHz,  $\text{CDCl}_3$ )  $\delta$  8.20 (d,  $J = 8.5$  Hz, 2H), 8.01 (d,  $J = 15.9$  Hz, 1H), 7.60 (d, 2H), 7.46 – 7.37 (m, 5H), 7.20 (s, 1H), 6.68 (d,  $J = 15.8$  Hz, 1H), 4.47 (s, 2H), 3.73 (s, 6H), 1.48 (s, 9H).  $^{13}\text{C}$  NMR (126 MHz,  $\text{CDCl}_3$ )  $\delta$  171.20, 170.13, 167.01, 155.57, 151.69, 139.14, 135.55, 135.02, 134.72, 129.74, 128.96, 127.68, 122.81, 113.31, 111.84, 82.94, 67.10, 60.43, 53.45, 42.33, 40.11, 31.95, 30.96, 29.72, 29.38, 27.98, 22.72, 21.08, 14.22, 14.15, 1.94, 1.04.  $[\text{M}+\text{H}]$  Calcd, 432.2282; Obsd, 432.2281

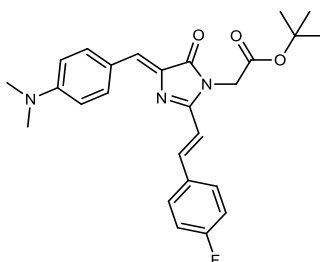

**P5: Tert-butyl 2-(4-((Z)-4-(dimethylamino)benzylidene)-2-((E)-4-fluorostyryl)-5-oxo-4,5-dihydro-1H-imidazol-1-yl)acetate.** Red solid (21%).

$^1\text{H}$  NMR (500 MHz,  $\text{CDCl}_3$ )  $\delta$  8.20 (d,  $J = 8.5$  Hz, 2H), 8.01 (d,  $J = 15.9$  Hz, 1H), 7.60 (d, 2H), 7.46 – 7.37 (m, 5H), 7.20 (s, 1H), 6.68 (d,  $J = 15.8$  Hz, 1H), 4.47 (s, 2H), 3.73 (s, 6H), 1.48 (s, 9H).  $^{13}\text{C}$  NMR (126 MHz,  $\text{CDCl}_3$ )  $\delta$  168.92, 166.66, 165.29, 164.84, 162.84, 155.52, 151.84, 149.90, 146.23, 140.60, 139.65, 137.15, 134.96, 132.42, 131.54, 131.51, 131.04, 130.96, 130.27, 129.83, 129.76, 122.61, 116.68, 116.50, 116.43, 116.30, 116.12, 112.23, 111.89, 111.87, 111.81, 83.24, 42.37, 42.32, 40.31, 40.23, 29.71, 29.10, 27.96, 26.27, 22.71, 14.14, 1.93.  $[\text{M}+\text{H}]$  Calcd, 450.2188; Obsd, 450.2188

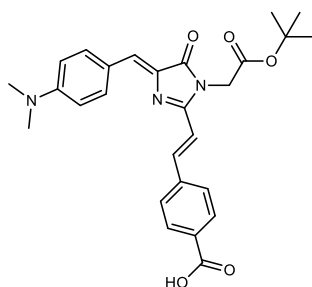

**P6:** 4-((E)-2-(1-(2-(tert-butoxy)-2-oxoethyl)-4-((Z)-4-(dimethylamino)benzylidene)-5-oxo-4,5-dihydro-1H-imidazol-2-yl)vinyl)benzoic acid. Red solid (40%).

$^1\text{H}$  NMR (500 MHz, MeOD)  $\delta$  8.21 (d,  $J = 8.7$  Hz, 2H), 8.09 (d, 2H), 8.02 (d,  $J = 15.8$  Hz, 1H), 7.82 (d, 2H), 7.15 (s, 1H), 7.12 (d,  $J = 15.9$  Hz, 1H), 6.85 (d, 2H), 4.62 (s, 2H), 3.14 (s, 6H), 1.49 (s, 9H).  $^{13}\text{C}$  NMR (126 MHz, MeOD)  $\delta$  167.40, 134.90, 129.95, 127.43, 122.20, 111.52, 82.54, 66.74, 38.77, 31.69, 29.36, 29.09, 26.81, 22.35, 13.05, 1.44.  $[\text{M}+\text{H}]$  Calcd, 476.2180; Obsd, 476.2140

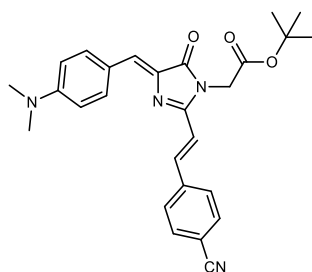

**P7:** Tert-butyl 2-(2-((E)-4-cyanostyryl)-4-((Z)-4-(dimethylamino)benzylidene)-5-oxo-4,5-dihydro-1H-imidazol-1-yl)acetate. Red solid (33%).

$^1\text{H}$  NMR (500 MHz,  $\text{CDCl}_3$ )  $\delta$  8.20 (d,  $J = 8.6$  Hz, 2H), 7.97 (d,  $J = 15.7$  Hz, 1H), 7.71 (d, 2H), 7.67 (d,  $J = 8.4$  Hz, 2H), 7.25 (s, 1H), 6.79 – 6.74 (m, 3H), 4.48 (s, 2H), 3.12 (s, 6H), 1.48 (s, 9H).

$^{13}\text{C}$  NMR (126 MHz,  $\text{CDCl}_3$ )  $\delta$  169.81, 166.97, 154.51, 151.95, 139.85, 136.30, 135.04, 134.70, 132.71, 131.11, 127.91, 122.61, 118.58, 116.84, 112.56, 111.86, 83.12, 42.26, 40.11, 31.95, 29.72, 29.39, 27.99, 22.72, 14.15, 1.04. [M+H] Calcd, 457.2234; Obsd, 457.2234



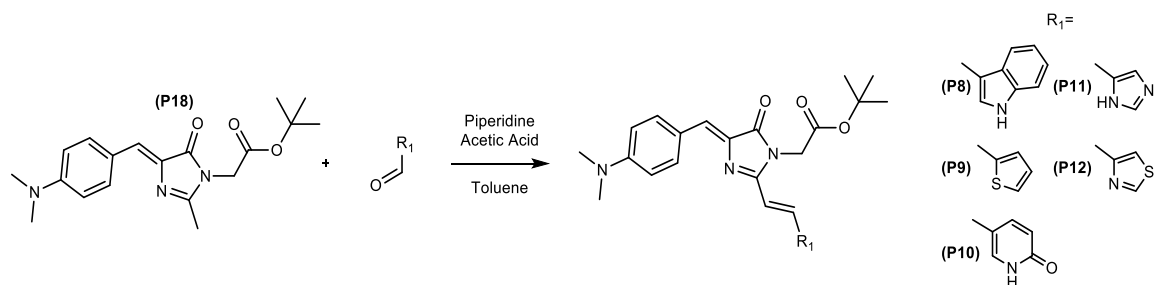

**Scheme S4:** Synthesis of P8-12

Conditions: aldehyde (1.5 mmol), P18 (343.0 mg, 1 mmol) were combine in toluene (2 mL) under Argon. Piperidine (824  $\mu$ L, 8.0 mmol) and then acetic acid (458  $\mu$ L, 8.0 mmol) were added and the reaction was refluxed at 110°C overnight. Solvent was removed and was purified by flash chromatography (various conditions) to yield P8-P12.

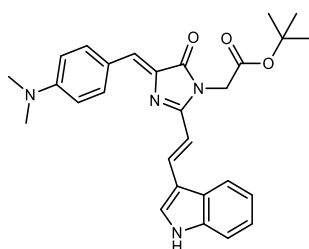

**P8:** Tert-butyl 2-(2-((E)-2-(1H-indol-3-yl)vinyl)-4-((Z)-4-(dimethylamino)benzylidene)-5-oxo-4,5-dihydro-1H-imidazol-1-yl)acetate. Red solid (25%).

$^1\text{H}$  NMR (500 MHz,  $\text{CDCl}_3$ )  $\delta$  8.49 (s, 1H), 8.27 (d,  $J$  = 15.6 Hz, 1H), 8.22 (d,  $J$  = 8.7 Hz, 1H), 7.99 – 7.90 (m, 1H), 7.80 – 7.74 (m, 2H), 7.55 (d,  $J$  = 34.1, 2.8 Hz, 1H), 7.46 (t,  $J$  = 7.2 Hz, 1H), 7.38 – 7.29 (m, 2H), 7.14 (s, 1H), 6.78 (d,  $J$  = 8.7 Hz, 1H), 6.73 (d,  $J$  = 8.9 Hz, 2H), 6.69 (d, 1H), 4.52 (s, 2H), 3.12 (s, 6H).  $^{13}\text{C}$  NMR (126 MHz,  $\text{CDCl}_3$ )  $\delta$  190.39, 154.35, 134.32, 128.48, 123.46, 121.52, 120.51, 111.91, 111.86, 111.00, 82.86, 42.34, 40.15, 40.12, 28.02.  $[\text{M}+\text{H}]$  Calcd, 471.2391; Obsd, 471.2391

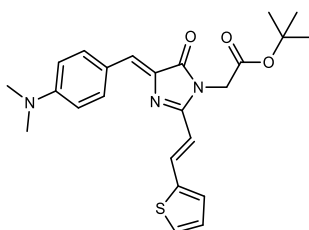

**P9: Tert-butyl 2-(4-((Z)-4-(dimethylamino)benzylidene)-5-oxo-2-((E)-2-(thiophen-2-yl)vinyl)-4,5-dihydro-1H-imidazol-1-yl)acetate.** Red solid (47%).

$^1\text{H}$  NMR (500 MHz,  $\text{CDCl}_3$ )  $\delta$  8.19 (d,  $J = 8.6$  Hz, 2H), 8.13 (d,  $J = 15.4$  Hz, 1H), 7.38 (d,  $J = 5.0$ , 1.0 Hz, 1H), 7.31 (d,  $J = 3.6$  Hz, 1H), 7.18 (s, 1H), 7.10 (dd,  $J = 5.1$ , 3.6 Hz, 1H), 6.77 (d, 2H), 6.43 (d,  $J = 15.5$  Hz, 1H), 4.45 (s, 2H), 3.10 (s, 6H), 1.49 (s, 9H).  $^{13}\text{C}$  NMR (126 MHz,  $\text{CDCl}_3$ )  $\delta$  170.06, 166.94, 155.30, 151.64, 141.18, 135.16, 134.67, 131.70, 130.10, 129.34, 128.26, 127.62, 122.89, 112.21, 111.84, 111.38, 82.96, 42.18, 40.11, 40.06, 29.72, 27.99 [M+H] Calcd, 438.1846; Obsd, 438.1844

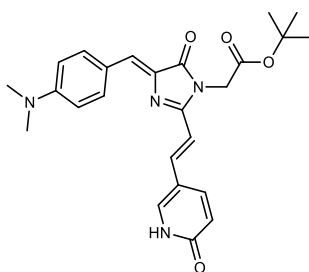

**P10: Tert-butyl 2-(4-((Z)-4-(dimethylamino)benzylidene)-5-oxo-2-((E)-2-(6-oxo-1,6-dihydropyridin-3-yl)vinyl)-4,5-dihydro-1H-imidazol-1-yl)acetate.** Red solid (17%)

$^1\text{H}$  NMR (500 MHz, MeOD)  $\delta$  8.00 (d, 2H), 7.77 – 7.73 (m, 1H), 7.53 – 7.50 (m, 3H), 7.31 – 7.27 (m, 3H), 7.12 (s, 1H), 4.45 (s, 2H), 3.11 (s, 6H), 1.51 (s, 9H).  $^{13}\text{C}$  NMR (126 MHz, MeOD)  $\delta$  190.98, 169.25, 167.13, 152.40, 134.64, 134.34, 130.11, 128.10, 121.19, 116.63, 111.58, 110.81, 102.62, 82.74, 82.54, 43.12, 41.72, 38.85, 38.76, 26.81, 26.78, 1.44. [M+H] Calcd, 449.2184; Obsd, 449.2182

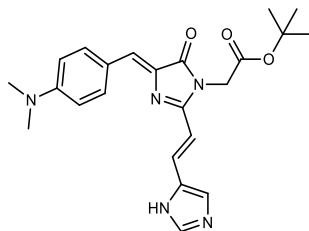

**P11: Tert-butyl 2-(2-((E)-2-(1H-imidazol-5-yl)vinyl)-4-((Z)-4-(dimethylamino)benzylidene)-5-oxo-4,5-dihydro-1H-imidazol-1-yl)acetate.** Red solid (19%).

$^1\text{H}$  NMR (500 MHz, MeOD)  $\delta$  8.74 (s, 1H), 8.03 – 8.01 (m, 1H), 7.97 (d, 2H), 7.44 (s, 1H), 7.32 (d,  $J = 12.8$  Hz, 1H), 7.01 (d, 2H), 6.49 (d,  $J = 12.8$  Hz, 1H), 4.71 (s, 2H), 3.22 (s, 6H), 1.52 (s,

9H).  $^{13}\text{C}$  NMR (126 MHz,  $\text{CDCl}_3$ )  $\delta$  170.45, 167.04, 151.99, 151.50, 136.76, 135.22, 134.52, 133.79, 130.07, 128.63, 128.43, 122.95, 112.63, 112.01, 111.82, 111.58, 111.36, 111.01, 110.79, 110.67, 70.39, 67.11, 42.18, 40.17, 40.11, 40.06, 29.73, 28.17, 28.08.  $[\text{M}+\text{H}]$  Calcd, 422.2187; Obsd, 422.2183

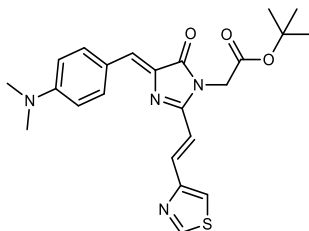

**P12: Tert-butyl 2-(4-((Z)-4-(dimethylamino)benzylidene)-5-oxo-2-((E)-2-(thiazol-4-yl)vinyl)-4,5-dihydro-1H-imidazol-1-yl)acetate.** Red solid (16%).

$^1\text{H}$  NMR (500 MHz,  $\text{CDCl}_3$ )  $\delta$  8.87 – 8.85 (m, 1H), 8.20 (d,  $J = 8.6$  Hz, 2H), 8.03 (d,  $J = 15.2$  Hz, 1H), 7.50 (d,  $J = 1.9$  Hz, 1H), 7.20 (s, 1H), 7.12 (d,  $J = 15.2$  Hz, 1H), 6.77 – 6.75 (m, 2H), 4.47 (s, 2H), 3.10 (s, 6H), 1.47 (s, 9H).  $^{13}\text{C}$  NMR (126 MHz,  $\text{CDCl}_3$ )  $\delta$  170.19, 166.87, 155.56, 153.65, 153.64, 153.51, 153.43, 152.60, 152.21, 151.68, 139.96, 135.16, 134.84, 134.76, 130.47, 129.78, 128.87, 125.40, 122.85, 122.39, 119.89, 115.95, 115.64, 111.81, 111.38, 82.93, 82.90, 53.47, 42.17, 42.14, 40.10, 40.06, 29.72, 28.00, 27.98.  $[\text{M}+\text{H}]$  Calcd, 439.1799; Obsd, 439.1797

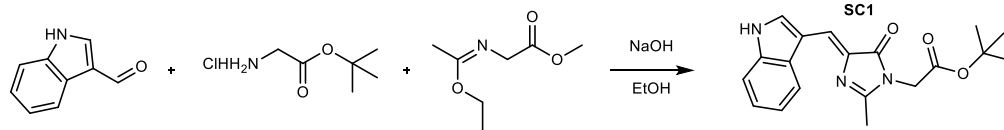

**Scheme S5:** Synthesis of Supplementary Compound 1 (**SC1**)

Conditions: glycine *tert*-butyl ester hydrochloride (183.7 mg, 1.1 mmol) was combine with NaOH (39.9 mg, 1 mmol) in EtOH (2 mL) and stirred for 1 hr. at room temperature, indole-3-carboxaldehyde (145.1 mg, 1.0 mmol) was added and stirred overnight at 25°C. Methyl (Z)-2-((1-ethoxyethylidene)amino)acetate (159 mg, 1.0 mmol) was prepared according to literature and added in one portion<sup>11</sup>. The reaction was stirred overnight at 25°C, then quenched by water (5 mL) and extracted with ether (3x10 mL). The organic fraction was collected and dried in vacuo. Compounds were further purified by flash chromatography (66% Ethyl Acetate, 33% Hexanes) to yield **SC1** a yellow solid.

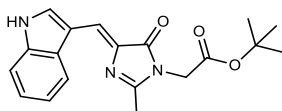

**SC1:** (Z)-*tert*-butyl 2-(4-((1H-indol-3-yl)methylene)-2-methyl-5-oxo-4,5-dihydro-1H-imidazol-1-yl)acetate. Yellow powder (45%).

<sup>1</sup>H NMR (500 MHz, DMSO-*d*<sub>6</sub>) 11.99 (s, 1H), 8.43 (d, *J*=2.8 Hz, 1H), 8.22 (d, *J*=7.7 Hz, 1H), 7.49 (d, *J*=7.9 Hz, 1H), 7.38 (s, 1H), 7.23 7.15 (m, 2H), 4.39 (s, 2H), 2.29 (s, 3H), 1.44 (s, 9H).  
<sup>13</sup>C NMR (126 MHz, DMSO-*d*<sub>6</sub>) 169.21, 167.94, 158.57, 136.90, 133.64, 127.18, 123.06, 121.30, 120.92, 120.18, 112.69, 111.56, 82.48, 42.31, 28.08, 15.54. [M+H]<sup>+</sup> Calcd, 340.1583; Obsd, 340.1873

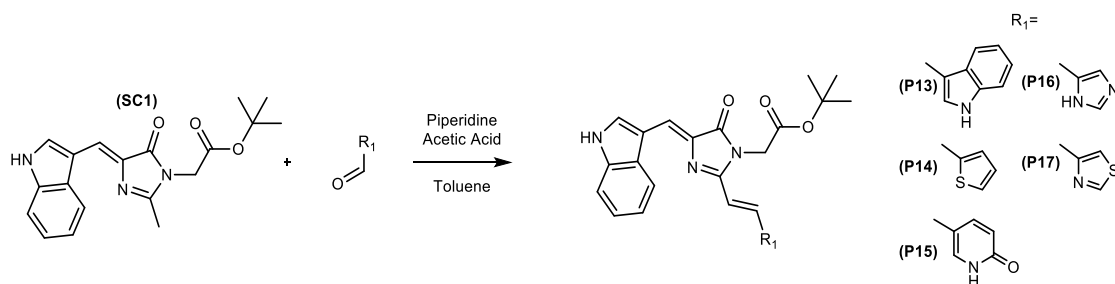

**Scheme S6:** Synthesis of P13-P17

Conditions: aldehyde (1.5 mmol), **SC1** (339.4 mg, 1 mmol) were combine in toluene (2 mL) under Argon. Piperidine (824  $\mu$ L, 8.0 mmol) and then acetic acid (458  $\mu$ L, 8.0 mmol) were added and the reaction was refluxed at 110°C overnight. Solvent was removed and was purified by flash chromatography (various conditions) to yield P13-P17.

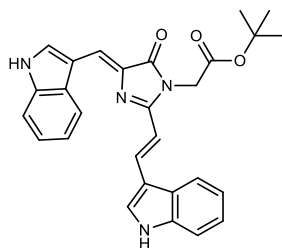

**P13:** Tert-butyl 2-((Z)-4-((1H-indol-3-yl)methylene)-2-((E)-2-(1H-indol-3-yl)vinyl)-5-oxo-4,5-dihydro-1H-imidazol-1-yl)acetate. Yellow-brown oil (20%).

$^1\text{H}$  NMR (500 MHz, DMSO- $d_6$ ) 12.02 (s, 1H), 11.84 (s, 1H), 8.60 (d,  $J=2.7$  Hz, 1H), 8.27 (d,  $J=15.6$  Hz, 1H), 8.20 (d,  $J=6.7$  Hz, 1H), 8.08 7.96 (m, 2H), 7.59 7.46 (m, 2H), 7.34 (s, 1H), 7.31 7.16 (m, 4H), 6.76 (d,  $J=15.7$  Hz, 1H), 4.65 (s, 2H), 1.42 (s, 9H).  $^{13}\text{C}$  NMR (126 MHz, DMSO- $d_6$ ) 168.04, 157.09, 137.99, 136.90, 133.32, 127.32, 125.32, 123.21, 123.09, 121.30, 120.69, 119.94, 118.39, 113.89, 112.99, 112.72, 82.43, 42.27, 28.11. [M+H] Calcd, 467.2078; Obsd, 467.2078

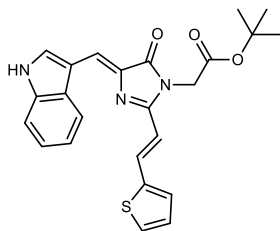

**P14: Tert-butyl 2-((Z)-4-((1H-indol-3-yl)methylene)-5-oxo-2-((E)-2-(thiophen-2-yl)vinyl)-4,5-dihydro-1H-imidazol-1-yl)acetate.** Orange oil (21%).

$^1\text{H}$  NMR (500 MHz,  $\text{CDCl}_3$ )  $\delta$  8.79 (s, 1H), 8.68 (d,  $J = 2.8$  Hz, 1H), 8.14 (d,  $J = 15.4$  Hz, 1H), 8.06 – 8.00 (m, 1H), 7.65 (s, 1H), 7.47 – 7.44 (m, 1H), 7.40 (d,  $J = 5.0$  Hz, 1H), 7.32 – 7.30 (m, 2H), 7.11 (dd,  $J = 5.0, 3.6$  Hz, 1H), 6.44 (d,  $J = 15.4$  Hz, 1H), 4.48 (s, 2H), 1.59 (s, 9H).  $^{13}\text{C}$  NMR (126 MHz,  $\text{CDCl}_3$ )  $\delta$  169.37, 166.98, 155.33, 141.03, 135.92, 131.89, 130.21, 128.30, 127.82, 127.43, 123.36, 121.68, 121.12, 119.31, 113.25, 112.15, 111.59, 83.08, 53.45, 42.19, 29.73, 28.01, 14.15.  $[\text{M}+\text{H}]$  Calcd, 434.1533; Obsd, 434.1531

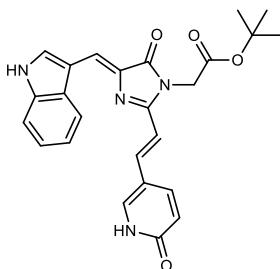

**P15: Tert-butyl 2-((Z)-4-((1H-indol-3-yl)methylene)-5-oxo-2-((E)-2-(6-oxo-1,6-dihydropyridin-3-yl)vinyl)-4,5-dihydro-1H-imidazol-1-yl)acetate.** Red oil (25%).

$^1\text{H}$  NMR (500 MHz,  $\text{CDCl}_3$ )  $\delta$  9.62 (s, 1H), 9.31 (d, 1H), 8.96 (s, 1H), 8.71 (s, 1H), 8.37 – 8.32 (m, 1H), 7.90 (s, 1H), 7.86 (d,  $J = 2.9$  Hz, 1H), 7.69 (s, 1H), 7.46 (d,  $J = 5.8$  Hz, 2H), 7.34 (d,  $J = 8.9$  Hz, 2H), 4.38 (s, 2H), 1.51 (s, 9H).  $^{13}\text{C}$  NMR (126 MHz,  $\text{CDCl}_3$ )  $\delta$  192.94, 185.21, 171.24, 167.09, 150.46, 150.09, 132.62, 132.15, 130.25, 130.00, 129.86, 129.45, 126.85, 126.49, 125.89, 124.46, 124.26, 123.32, 122.92, 122.34, 121.92, 121.56, 121.00, 111.94, 111.67, 90.79, 83.14, 70.19, 67.10, 66.15, 62.43, 60.44, 55.21, 53.46, 41.94, 29.72, 28.51, 28.21, 28.11, 28.02, 27.99, 27.69, 27.41, 21.09, 14.22.  $[\text{M}+\text{H}]$  Calcd, 445.1831; Obsd, 445.1868

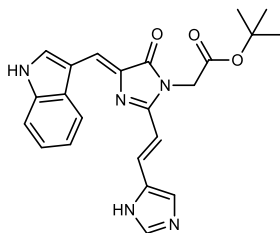

**P16: Tert-butyl 2-((Z)-2-((E)-2-(1H-indol-3-yl)methylene)-5-oxo-4,5-dihydro-1H-imidazol-1-yl)acetate.** Orange Solid (10%).

$^1\text{H}$  NMR (500 MHz,  $\text{CDCl}_3$ )  $\delta$  8.67 (s, 1H), 8.36 – 8.29 (m, 1H), 8.20 (d,  $J = 15.6$  Hz, 1H), 8.10 – 8.03 (m, 2H), 7.92 – 7.86 (m, 2H), 7.80 (d,  $J = 1.9$  Hz, 1H), 7.59 (d,  $J = 14.7$  Hz, 1H), 7.41 – 7.40 (m, 1H), 7.31 – 7.30 (m, 1H), 6.61 (d,  $J = 15.7$  Hz, 1H), 4.54 (s, 2H), 1.52 (s, 9H).  $^{13}\text{C}$  NMR (126 MHz,  $\text{CDCl}_3$ )  $\delta$  172.28, 167.19, 150.93, 141.69, 137.94, 135.79, 130.69, 129.35, 129.00, 127.66, 123.96, 122.36, 122.04, 118.16, 114.39, 113.14, 110.01, 109.70, 82.02, 44.09, 28.09. [M-H] Calcd, 416.1728; Obsd, 416.2095

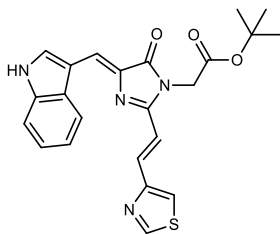

**P17: Tert-butyl 2-((Z)-4-((1H-indol-3-yl)methylene)-5-oxo-2-((E)-2-(thiazol-4-yl)vinyl)-4,5-dihydro-1H-imidazol-1-yl)acetate.** Orange Solid (10%).

$^1\text{H}$  NMR (500 MHz,  $\text{CDCl}_3$ )  $\delta$  9.11 (s, 1H), 8.79 (d, 1H), 7.64 – 7.53 (m, 2H), 7.38 (d,  $J = 8.6$  Hz, 2H), 7.29 (d,  $J = 13.7$  Hz, 1H), 7.23 (m, 1H), 7.07 (m, 1H), 6.95 (d,  $J = 13.7$  Hz, 1H), 6.88 (s, 1H), 4.45 (s, 2H) 1.50 (s, 9H).  $^{13}\text{C}$  NMR (126 MHz,  $\text{CDCl}_3$ )  $\delta$  172.28, 167.19, 150.93, 141.69, 137.94, 135.79, 130.69, 129.35, 129.00, 127.66, 123.96, 122.36, 122.04, 118.16, 114.39, 113.14, 110.01, 109.70, 82.02, 44.09, 28.09. [M+H] Calcd, 435.1486; Obsd, 435.1446

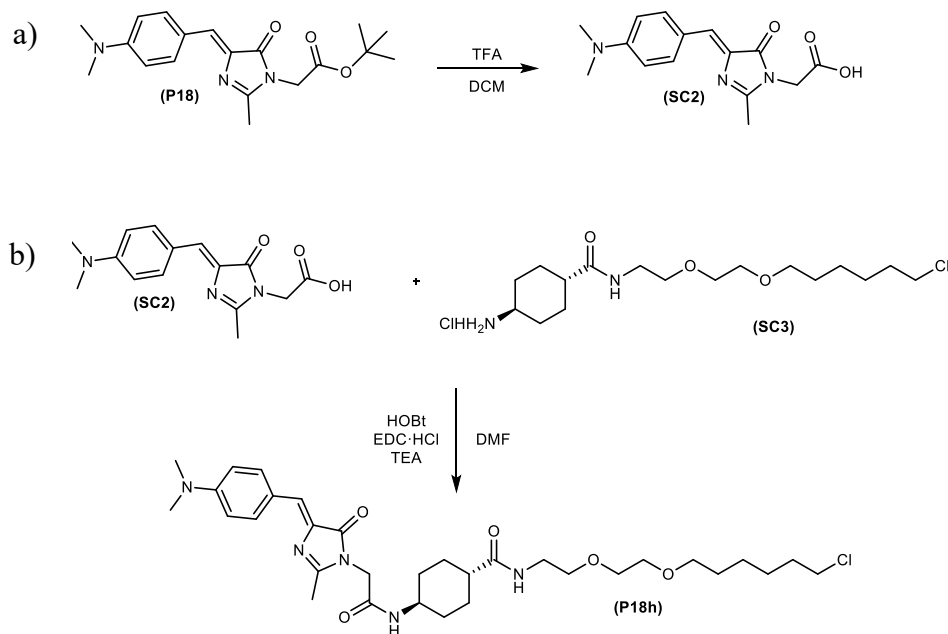

**Scheme S7:** Synthesis of P18h

Conditions: a) P18 (343.9 mg, 1.0 mmol) was deprotected according to standard protocols with trifluoroacetic acid (1.5 mL, 20 mmol) in dichloromethane (5 mL) for 1 hr. at 25°C and monitored via TLC (50% Ethyl Acetate/50% Hexanes) to yield **SC2**, which was used without further purification.

Conditions: b) **SC3** was prepared according to previous literature protocols<sup>12</sup>. **SC2** (287.1 mg, 1.0 mmol), **SC3** (384.1 mg, 1.0 mmol), 1-Hydroxybenzotriazole hydrate (270.2 mg, 2.0 mmol), N-(3-Dimethylaminopropyl)-N'-ethylcarbodiimide hydrochloride (287.6 mg, 1.5 mmol), and triethylamine (836 mg, 6.0 mmol) were combined in DMF (10 mL) and stirred overnight at 25°C. The reaction mixture was quenched by water (5 mL) and extracted with DCM (3x10 mL). The organic fraction was collected and dried in vacuo. Crude mixture was purified by flash chromatography (100% Ethyl Acetate) to yield P18h a yellow powder.



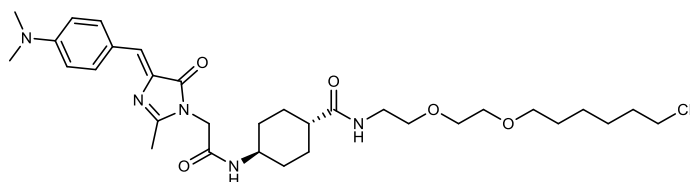

**P18h: (1r,4r)-N-(2-(2-((6-chlorohexyl)oxy)ethoxy)ethyl)-4-(2-((Z)-4-(4-(dimethylamino)benzylidene)-2-methyl-5-oxo-4,5-dihydro-1H-imidazol-1-yl)acetamido)cyclohexanecarboxamide.** Yellow powder (51%).

$^1\text{H}$  NMR (500 MHz, Chloroform-*d*)  $\delta$  8.09 (d,  $J = 8.8$  Hz, 2H), 7.14 (s, 1H), 6.73 (d,  $J = 8.9$  Hz, 2H), 6.17 – 5.87 (m, 2H), 4.23 (s, 2H), 3.60 – 3.40 (m, 12H), 3.09 (s, 6H), 2.40 (s, 3H), 2.10 – 1.18 (m, 16H), 1.22 – 1.09 (m, 2H).  $^{13}\text{C}$  NMR (126 MHz, Chloroform-*d*)  $\delta$  175.00, 170.58, 166.30, 157.55, 151.89, 134.59, 133.56, 130.57, 121.84, 111.77, 71.27, 70.24, 70.00, 69.81, 48.21, 45.08, 44.76, 44.37, 40.05, 39.02, 32.52, 32.03, 29.46, 28.26, 26.69, 25.41, 15.59. [M+H]  
Calcd, 618.3344; Obsd, 618.3441.

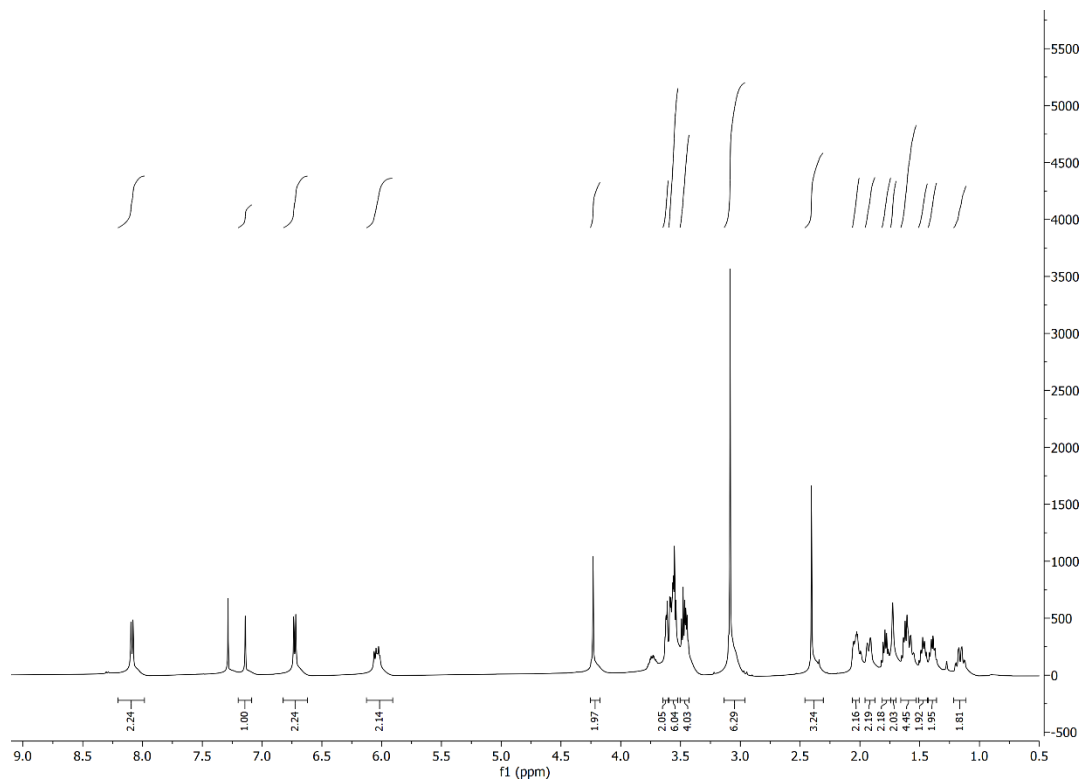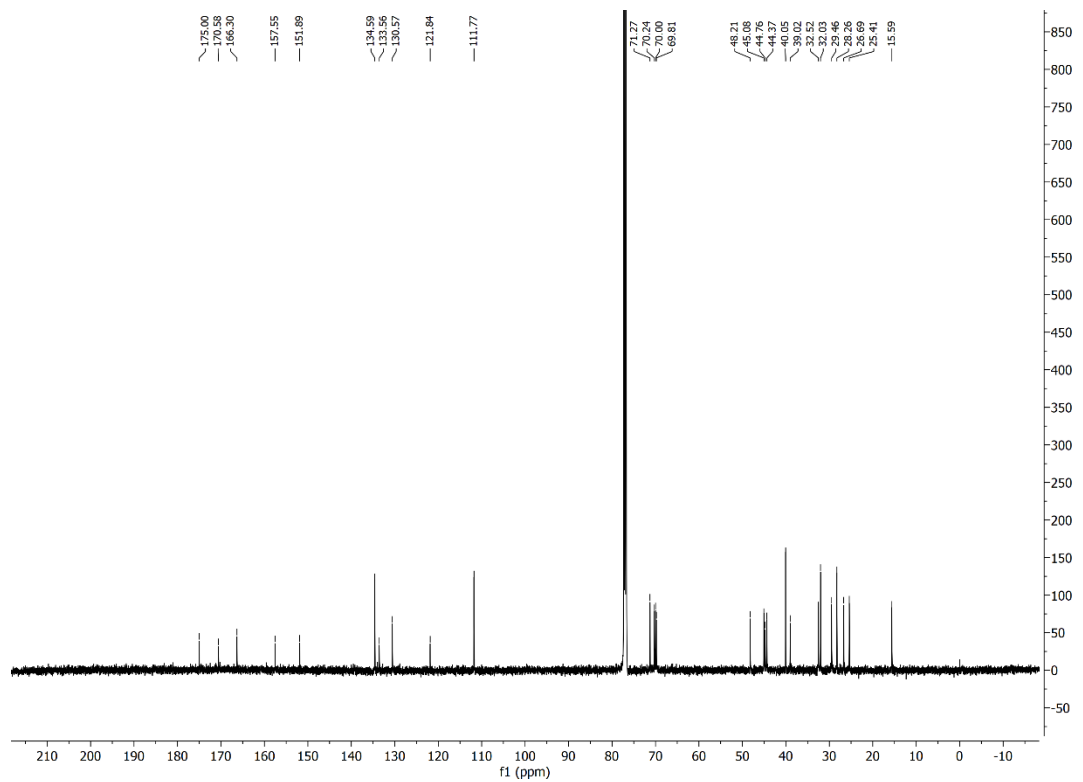

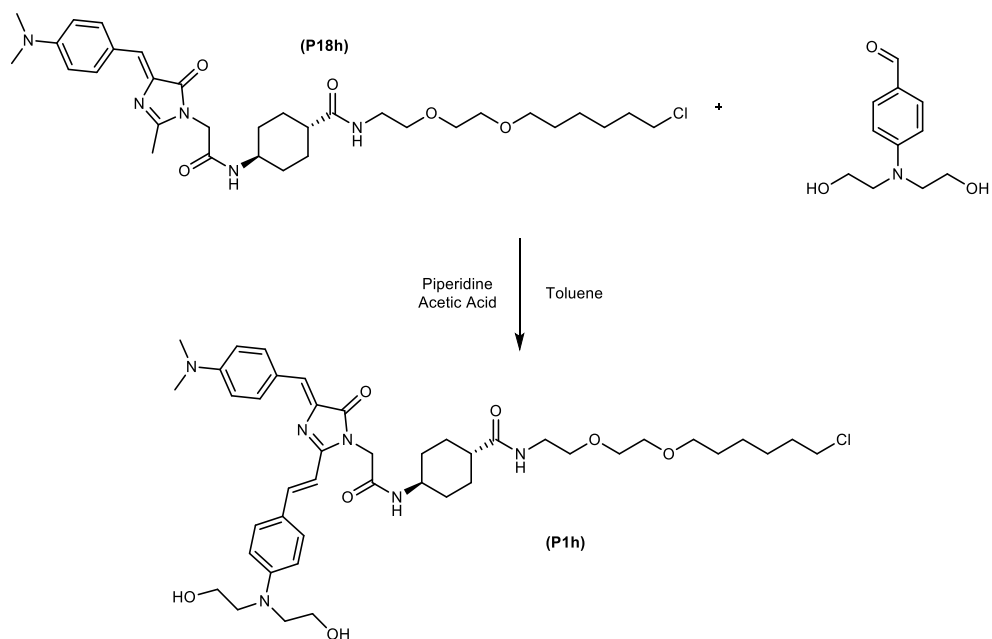

**Scheme S8:** Synthesis of P1h

Condition: 4-[Bis(2-hydroxyethyl)amino]benzaldehyde (313.6 mg, 1.5 mmol), P18h (602.3 mg, 1.0 mmol) were combine in toluene (5 mL) under Argon. Piperidine (824  $\mu$ L, 8.0 mmol) and then acetic acid (458  $\mu$ L, 8.0 mmol) were added and the reaction was refluxed at 110°C overnight. Solvent was removed and crude mixture was purified by flash chromatography (5% MeOH, 95% DMC) to yield P1h a red oil.

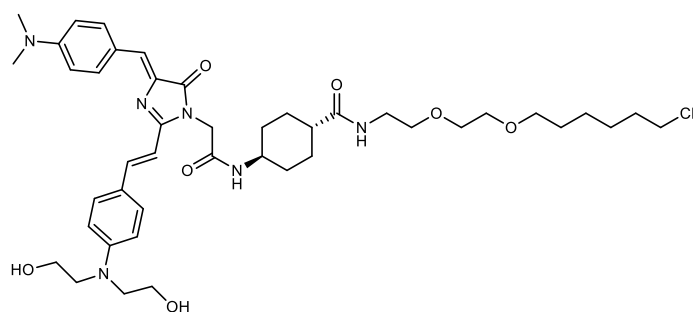

**P1h: 4-(2-((E)-2-((E)-4-(bis(2-hydroxyethyl)amino)styryl)-4-(dimethylamino)benzylidene)-5-oxo-4,5-dihydro-1H-imidazol-1-yl)acetamido)-N-(2-(2-((6-chlorohexyl)oxy)ethoxy)ethyl)cyclohexanecarboxamide.** Red solid (20%).

$^1\text{H}$  NMR (500 MHz, DMSO- $d_6$ )  $\delta$  8.17 (d,  $J$  = 8.3 Hz, 2H), 7.79 (d,  $J$  = 15.5 Hz, 1H), 7.55 (d,  $J$  = 8.7 Hz, 2H), 6.84 (s, 1H), 6.80 (d,  $J$  = 9.9, 2.7 Hz, 2H), 6.75 (d,  $J$  = 8.6, 5.5 Hz, 2H), 6.66 (d,  $J$  = 15.5 Hz, 1H), 4.82 (m, 2H), 4.38 (s, 2H), 3.64 – 3.55 (m, 8H), 3.54 – 3.43 (m, 8H), 3.40-3.36 (m, 4H), 3.22-3.12 (m, 2H), 3.04 (s, 6H), 1.86-1.81 (m, 2H), 1.75-1.66 (m, 4H), 1.53-1.45 (m, 2H), 1.43 – 1.17 (m, 10H).  $^{13}\text{C}$  NMR (126 MHz, DMSO- $d_6$ )  $\delta$  175.25, 170.23, 166.41, 158.08, 151.50, 150.03, 136.00, 134.27, 130.24, 122.98, 122.85, 112.29, 111.90, 70.64, 70.05, 69.90, 69.56, 58.61, 58.44, 53.60, 48.10, 45.84, 43.53, 38.85, 32.49, 32.08, 29.54, 28.61, 26.59, 25.40. [M+H] Calcd, 809.4357; Obsd, 809.4369

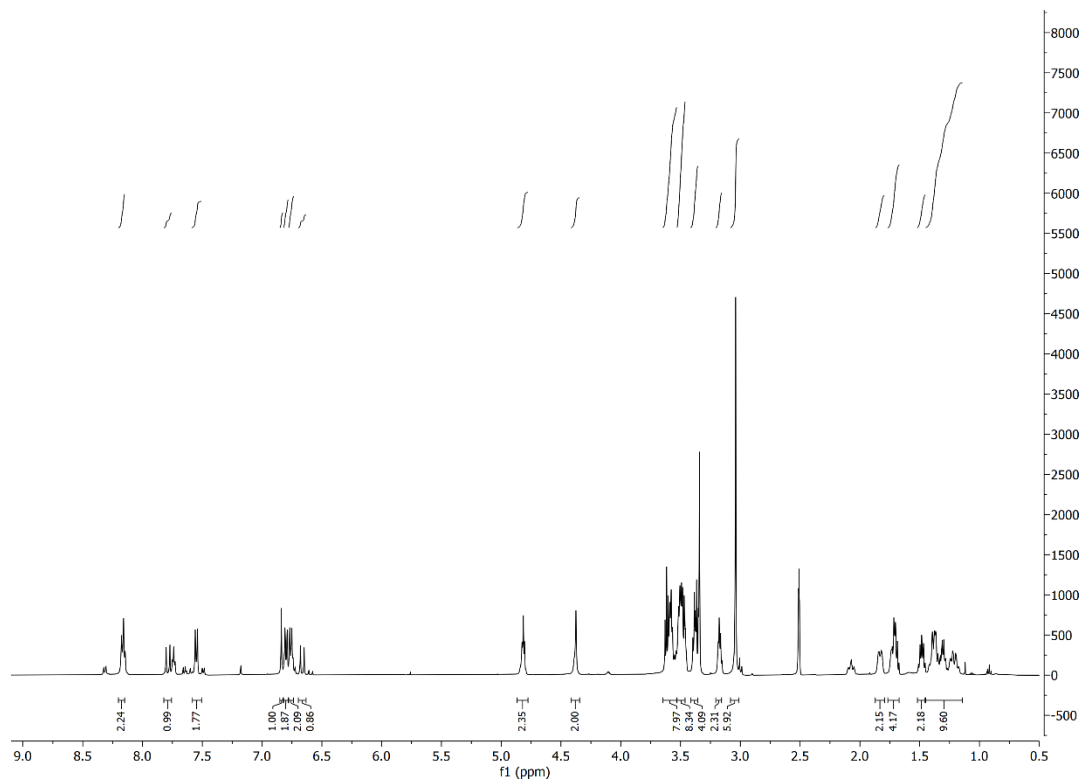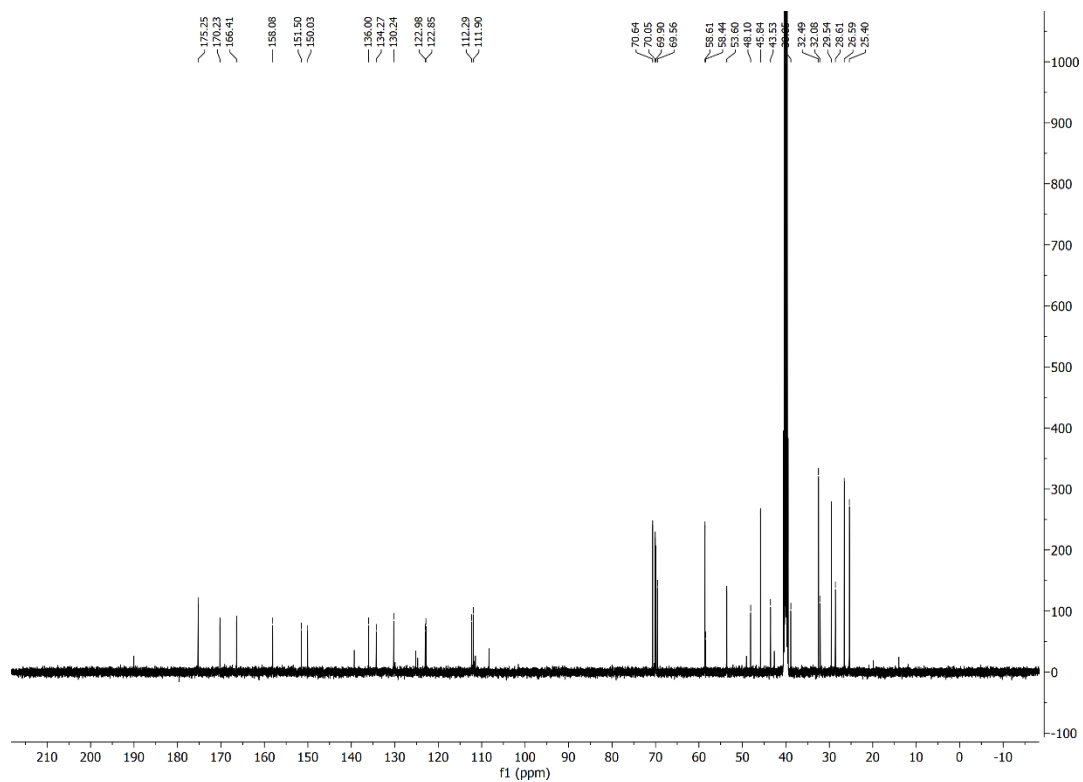

## 6. Supplementary Notes

### *Note S1. Temperature-independence of P1 and P18 Fluorescent Emission*

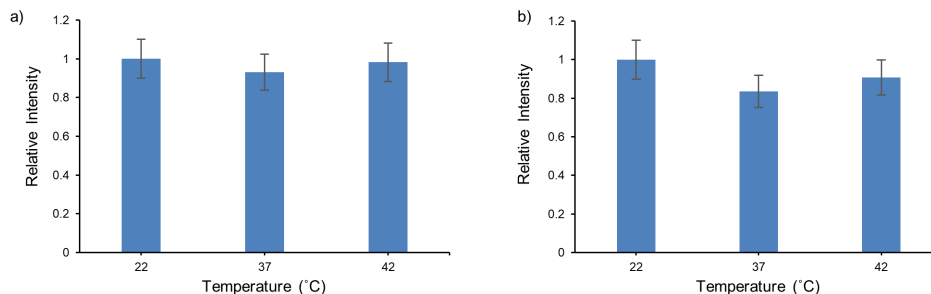

Emission spectrum for P1 (**a**) and P18 (**b**) were recorded in water and glycerol mixtures at varying temperatures. All samples exhibit similar viscosity (cp) values: 22 °C - 89.5% glycerol (243 cp), 37 °C – 97.5% glycerol (243 cp) and 42 °C – 100% glycerol (245 cp). All fluorophores were dissolved with a final concentration at 5  $\mu$ M and excited at 540 nm for P1 and 450 nm for P18 using a Tecan infinite M1000Pro fluorescence microplate reader with temperature control function. Fluorescence emission intensity of both probes were independent of temperatures of 22, 37, and 42°C.

**Note S2. Beer-Lambert Plots of P2-P17**

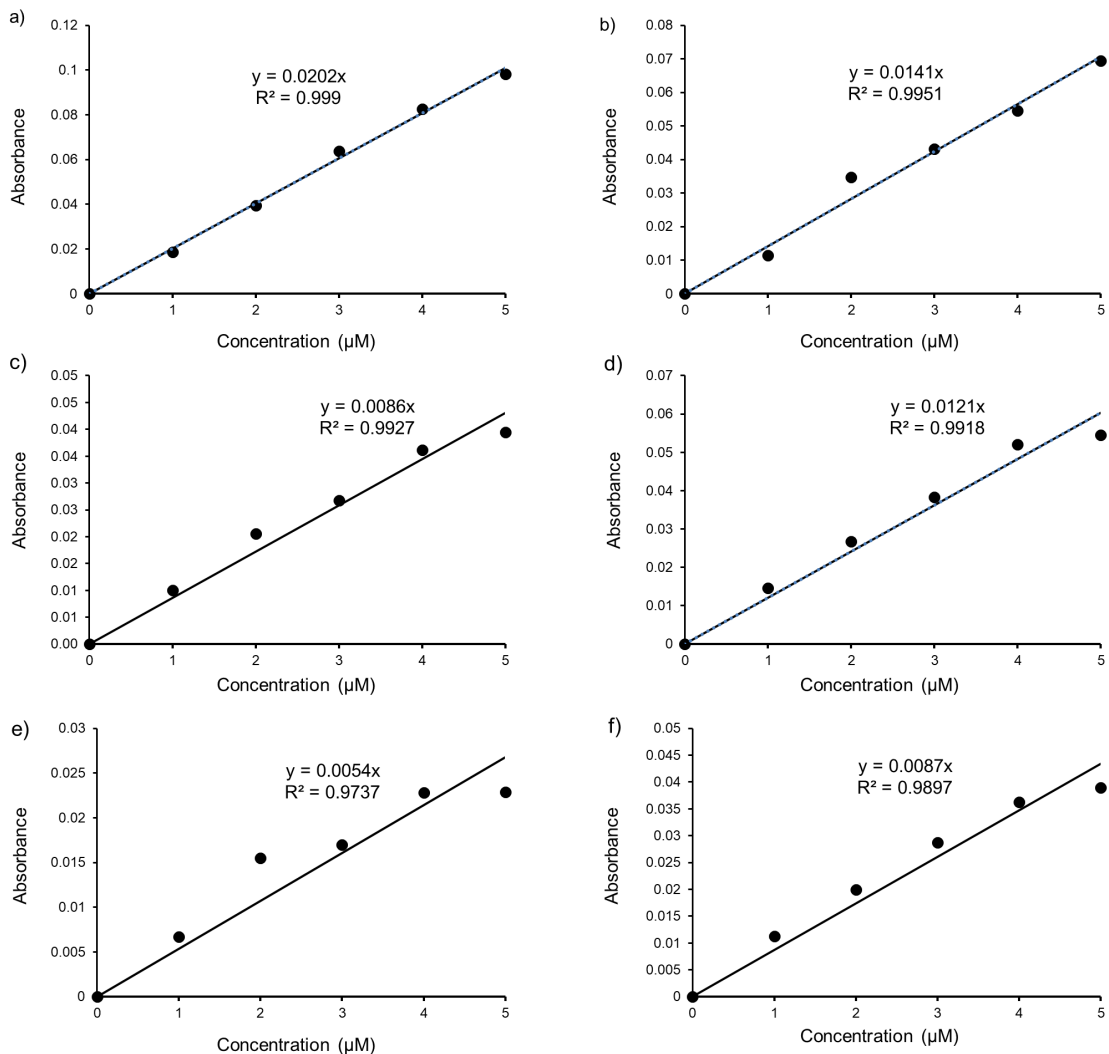

Plot of absorbance at  $\lambda_{\text{max}}$  as a function of concentration for P2-7: **a)** P2, **b)** P3, **c)** P4, **d)** P5, **e)** P6, **f)** P7. All fluorophores were dissolved in glycerol with a final concentration of 1-5  $\mu\text{M}$  and absorption peak was measured using a Tecan infinite M1000Pro fluorescence microplate reader. The linear relationship in this concentration range shows the probes are not undergoing self-induced aggregation.

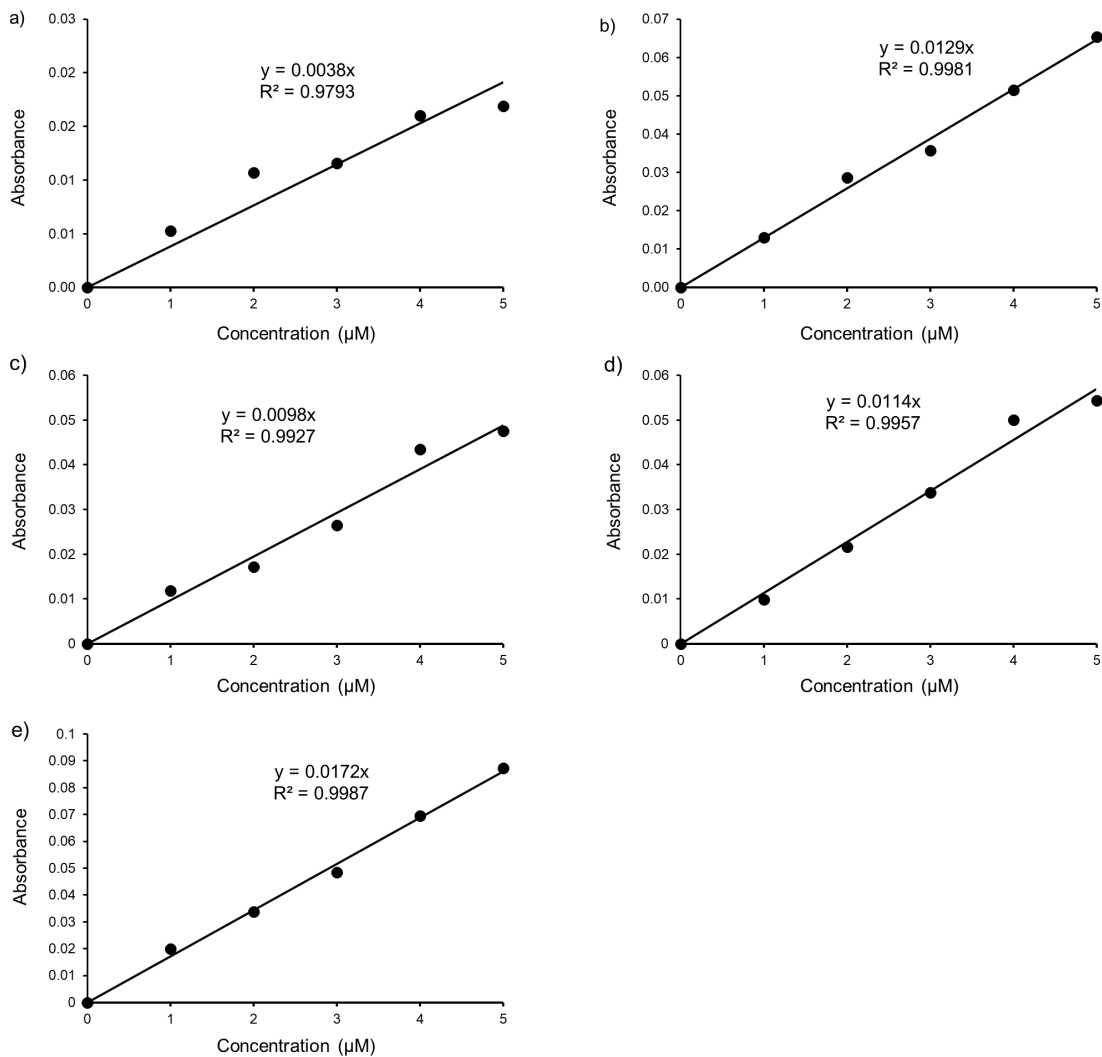

Plot of absorbance at  $\lambda_{\text{max}}$  as a function of concentration for P8-11: **a)** P8, **b)** P9, **c)** P10, **d)** P11, **e)** P12. All fluorophores were dissolved in glycerol with a final concentration of 1-5  $\mu\text{M}$  and absorption peak was measured using a Tecan infinite M1000Pro fluorescence microplate reader. The linear relationship in this concentration range shows the probes are not undergoing self-induced aggregation.



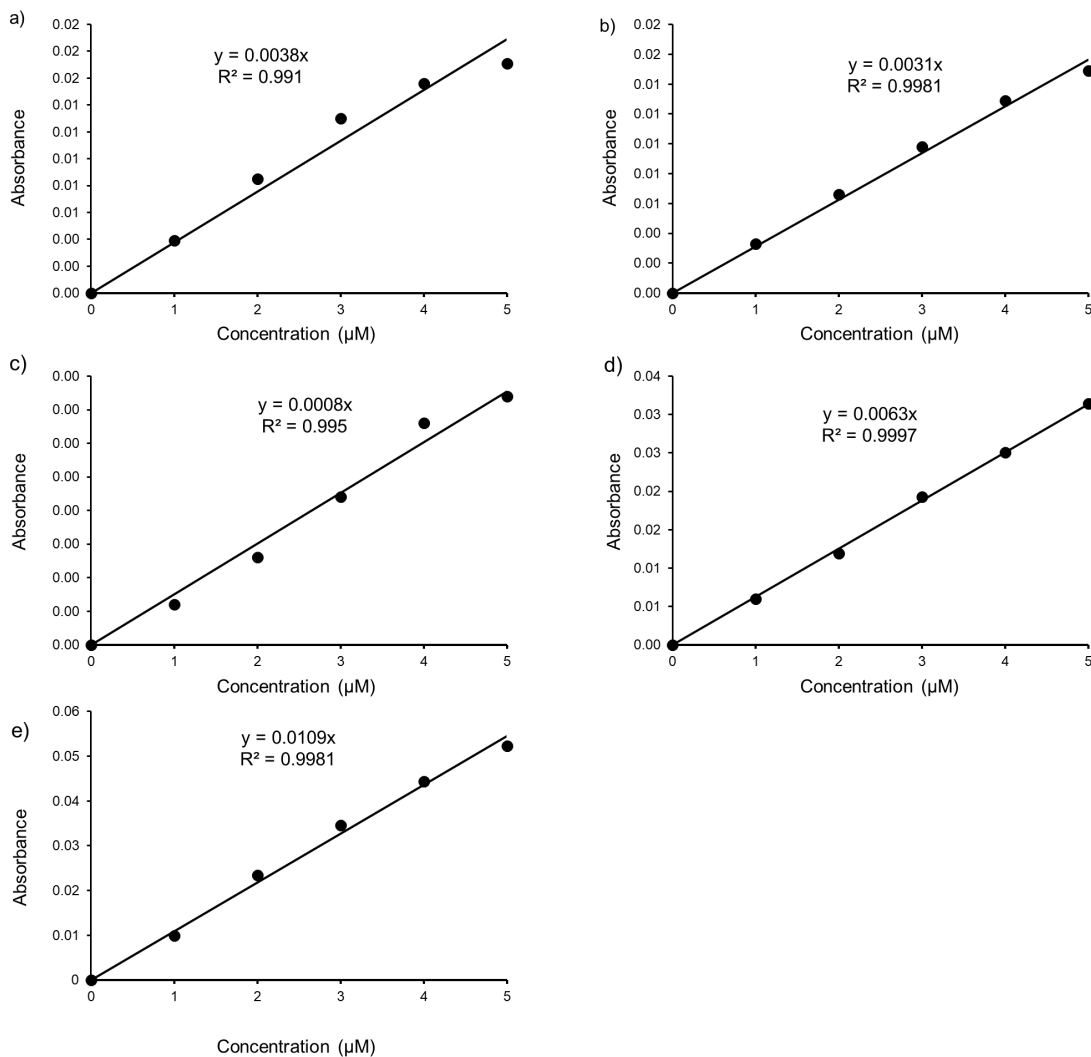

Plot of absorbance at  $\lambda_{\text{max}}$  as a function of concentration for P13-17: **a)** P13, **b)** P14, **c)** P15, **d)** P16, **e)** P17. All fluorophores were dissolved in glycerol with a final concentration of 1-5  $\mu\text{M}$  and absorption peak was measured using a Tecan infinite M1000Pro fluorescence microplate reader. The linear relationship in this concentration range shows the probes are not undergoing self-induced aggregation.

### Note S3. Limit of Detection for P1h and P18h

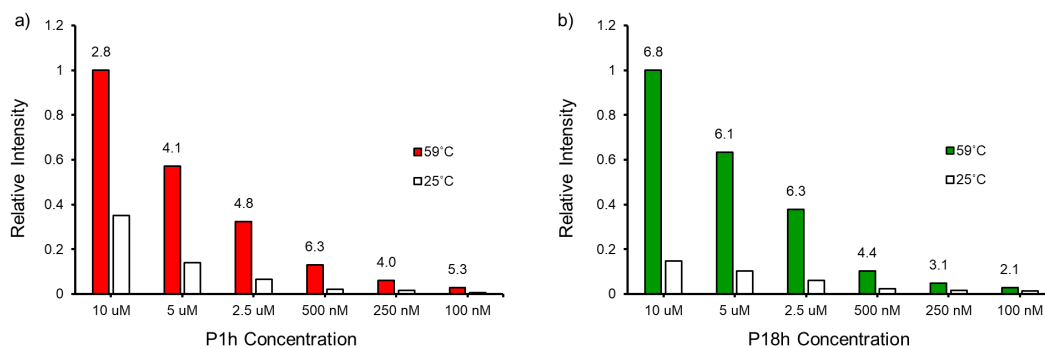

LOD refers to the lower limit amount of protein aggregates that the probe could detect. Essentially, the LOD is determined by whether the signal-to-noise ratio is sufficient at low concentrations of either protein aggregates or probes. Thus, we designed an experiment wherein the probe concentrations vary between 0.1  $\mu\text{M}$  and 10  $\mu\text{M}$ , when conjugated to 25  $\mu\text{M}$  of purified SOD1(A4V)-Halo (similar experiment to Figure 5d). The signal is defined as fluorescence intensity when P1h or P18h are detecting protein aggregates (59  $^{\circ}\text{C}$  that induced aggregation of SOD1-A4V-Halo) and the noise is defined as fluorescence intensity when P1h or P18h conjugated with folded proteins (25  $^{\circ}\text{C}$  wherein SOD1-A4V-Halo is folded). For P1h, our results show that concentrations between 0.1 to 5  $\mu\text{M}$  yields the best fluorescence increase (4-6 fold) induced by protein aggregation. For P18h, this range is between 0.5 to 10  $\mu\text{M}$  (4-7 fold). Thus, we conclude that the LOD for P1h is 0.1  $\mu\text{M}$  and P18h is 0.5  $\mu\text{M}$ . In our applications, the in vitro experiment used 5  $\mu\text{M}$  and cellular imaging experiment used 0.5  $\mu\text{M}$ , both of which are within the range of effective concentrations of P1h and P18h. Aggregation of SOD1-(A4V)-Halo was carried out with DPBS buffer with 80 mM EDTA added after conjugation to chelate the structural metal. Conjugation of P1h or P18h to purified SOD1-(A4V)-Halo protein was completed by incubation of the probe (various concentrations) with protein (25  $\mu\text{M}$ ) in a 1.5 mL microcentrifuge tube for 15 min in the absence of ambient light prior. Reaction was carried out quiescently at indicated temperatures for 25 minutes. Emission spectrum for P1h (a) and P18h (b) were recorded using a Tecan infinite M1000Pro fluorescence microplate reader.

## 7. References

- 1 Wurth, C., Grabolle, M., Pauli, J., Spieles, M. & Resch-Genger, U. Relative and absolute determination of fluorescence quantum yields of transparent samples. *Nat Protoc* **8**, 1535-1550, (2013).
- 2 Zhang, X. *et al.* The Heat-Shock Response Transcriptional Program Enables High-Yield and High-Quality Recombinant Protein Production in *Escherichia coli*. *ACS Chem Biol* **9**, 1945-1949 (2014).
- 3 Olsen, S. & Smith, S. C. Radiationless decay of red fluorescent protein chromophore models via twisted intramolecular charge-transfer states. *J Am Chem Soc* **129**, 2054-2065, (2007).
- 4 Eade, R. H. A. & Robb, M. A. Direct Minimization in Mc Scf Theory - the Quasi-Newton Method. *Chem Phys Lett* **83**, 362-368, (1981).
- 5 Bochenkova, A. V. & Andersen, L. H. Ultrafast dual photoresponse of isolated biological chromophores: link to the photoinduced mode-specific non-adiabatic dynamics in proteins. *Faraday Discuss* **163**, 297-319, (2013).
- 6 Paolino, M. *et al.* Design, Synthesis, and Dynamics of a Green Fluorescent Protein Fluorophore Mimic with an Ultrafast Switching Function. *J Am Chem Soc* **138**, 9807-9825, (2016).
- 7 Martin, M. E., Negri, F. & Olivucci, M. Origin, nature, and fate of the fluorescent state of the green fluorescent protein chromophore at the CASPT2//CASSCF resolution. *J Am Chem Soc* **126**, 5452-5464, (2004).
- 8 Polyakov, I., Epifanovsky, E., Grigorenko, B., Krylov, A. I. & Nemukhin, A. Quantum Chemical Benchmark Studies of the Electronic Properties of the Green Fluorescent Protein Chromophore: 2. Cis-Trans Isomerization in Water. *J Chem Theory Comput* **5**, 1907-1914, (2009).
- 9 Frisch, M. J., Pople, J. A. & Binkley, J. S. Self-Consistent Molecular-Orbital Methods .25. Supplementary Functions for Gaussian-Basis Sets. *J Chem Phys* **80**, 3265-3269, (1984).
- 10 Becke, A. D. Density-Functional Thermochemistry .3. The Role of Exact Exchange. *J Chem Phys* **98**, 5648-5652, (1993).
- 11 Baldridge, A., Kowalik, J. & Tolbert, L. M. Efficient Synthesis of New 4-Arylideneimidazolin-5-ones Related to the GFP Chromophore by 2+3 Cyclocondensation of Arylideneimines with Imidate Ylides. *Synthesis-Stuttgart*, 2424-2436, (2010).
- 12 Liu, Y. *et al.* Modulation of Fluorescent Protein Chromophores To Detect Protein Aggregation with Turn-On Fluorescence. *J Am Chem Soc* **140**, 7381-7384, (2018).
